# Supplementary material for: Analysis of Alternative Splicing and Alternative Polyadenylation in Populus alba var. pyramidalis by Single-Molecular Long-Read Sequencing
Source: Front Genet. 2020 Feb 7;11:48. doi: 10.3389/fgene.2020.00048 (PMC7020888; doi:10.3389/fgene.2020.00048)
Supplement: Supplementary file 3 [file DataSheet_3.xlsx]

## Sheet: xjy_isoform
Data S3. The fusion transcripts identified in this study
scaffold	source	feature	start	end	score	strand	frame	attribute
GWHAAEP00000531	PacBio	transcript	26169	27950	.	+	.	gene_id "PBfusion.138"; transcript_id "PBfusion.138.1";
GWHAAEP00000531	PacBio	exon	26169	26449	.	+	.	gene_id "PBfusion.138"; transcript_id "PBfusion.138.1";
GWHAAEP00000531	PacBio	exon	26532	26702	.	+	.	gene_id "PBfusion.138"; transcript_id "PBfusion.138.1";
GWHAAEP00000531	PacBio	exon	26803	26871	.	+	.	gene_id "PBfusion.138"; transcript_id "PBfusion.138.1";
GWHAAEP00000531	PacBio	exon	26957	27144	.	+	.	gene_id "PBfusion.138"; transcript_id "PBfusion.138.1";
GWHAAEP00000531	PacBio	exon	27522	27950	.	+	.	gene_id "PBfusion.138"; transcript_id "PBfusion.138.1";
GWHAAEP00010331	PacBio	transcript	11719	13500	.	-	.	gene_id "PBfusion.138"; transcript_id "PBfusion.138.2";
GWHAAEP00010331	PacBio	exon	11719	12147	.	-	.	gene_id "PBfusion.138"; transcript_id "PBfusion.138.2";
GWHAAEP00010331	PacBio	exon	12525	12712	.	-	.	gene_id "PBfusion.138"; transcript_id "PBfusion.138.2";
GWHAAEP00010331	PacBio	exon	12798	12866	.	-	.	gene_id "PBfusion.138"; transcript_id "PBfusion.138.2";
GWHAAEP00010331	PacBio	exon	12967	13137	.	-	.	gene_id "PBfusion.138"; transcript_id "PBfusion.138.2";
GWHAAEP00010331	PacBio	exon	13220	13500	.	-	.	gene_id "PBfusion.138"; transcript_id "PBfusion.138.2";
GWHAAEP00002716	PacBio	transcript	151333	152601	.	-	.	gene_id "PBfusion.139"; transcript_id "PBfusion.139.1";
GWHAAEP00002716	PacBio	exon	151333	152601	.	-	.	gene_id "PBfusion.139"; transcript_id "PBfusion.139.1";
GWHAAEP00012270	PacBio	transcript	2771	4038	.	-	.	gene_id "PBfusion.139"; transcript_id "PBfusion.139.2";
GWHAAEP00012270	PacBio	exon	2771	4038	.	-	.	gene_id "PBfusion.139"; transcript_id "PBfusion.139.2";
GWHAAEP00003533	PacBio	transcript	283057	285742	.	-	.	gene_id "PBfusion.130"; transcript_id "PBfusion.130.1";
GWHAAEP00003533	PacBio	exon	283057	285742	.	-	.	gene_id "PBfusion.130"; transcript_id "PBfusion.130.1";
GWHAAEP00005958	PacBio	transcript	7518	10203	.	-	.	gene_id "PBfusion.130"; transcript_id "PBfusion.130.2";
GWHAAEP00005958	PacBio	exon	7518	10203	.	-	.	gene_id "PBfusion.130"; transcript_id "PBfusion.130.2";
GWHAAEP00000633	PacBio	transcript	7171	17392	.	-	.	gene_id "PBfusion.131"; transcript_id "PBfusion.131.1";
GWHAAEP00000633	PacBio	exon	7171	7985	.	-	.	gene_id "PBfusion.131"; transcript_id "PBfusion.131.1";
GWHAAEP00000633	PacBio	exon	8109	8194	.	-	.	gene_id "PBfusion.131"; transcript_id "PBfusion.131.1";
GWHAAEP00000633	PacBio	exon	8646	8759	.	-	.	gene_id "PBfusion.131"; transcript_id "PBfusion.131.1";
GWHAAEP00000633	PacBio	exon	10179	10548	.	-	.	gene_id "PBfusion.131"; transcript_id "PBfusion.131.1";
GWHAAEP00000633	PacBio	exon	11322	11455	.	-	.	gene_id "PBfusion.131"; transcript_id "PBfusion.131.1";
GWHAAEP00000633	PacBio	exon	12622	12730	.	-	.	gene_id "PBfusion.131"; transcript_id "PBfusion.131.1";
GWHAAEP00000633	PacBio	exon	13533	13654	.	-	.	gene_id "PBfusion.131"; transcript_id "PBfusion.131.1";
GWHAAEP00000633	PacBio	exon	14165	14271	.	-	.	gene_id "PBfusion.131"; transcript_id "PBfusion.131.1";
GWHAAEP00000633	PacBio	exon	14647	14751	.	-	.	gene_id "PBfusion.131"; transcript_id "PBfusion.131.1";
GWHAAEP00000633	PacBio	exon	14850	15008	.	-	.	gene_id "PBfusion.131"; transcript_id "PBfusion.131.1";
GWHAAEP00000633	PacBio	exon	15379	15434	.	-	.	gene_id "PBfusion.131"; transcript_id "PBfusion.131.1";
GWHAAEP00000633	PacBio	exon	16002	16053	.	-	.	gene_id "PBfusion.131"; transcript_id "PBfusion.131.1";
GWHAAEP00000633	PacBio	exon	16274	17392	.	-	.	gene_id "PBfusion.131"; transcript_id "PBfusion.131.1";
GWHAAEP00000862	PacBio	transcript	60577	70798	.	-	.	gene_id "PBfusion.131"; transcript_id "PBfusion.131.2";
GWHAAEP00000862	PacBio	exon	60577	61391	.	-	.	gene_id "PBfusion.131"; transcript_id "PBfusion.131.2";
GWHAAEP00000862	PacBio	exon	61515	61600	.	-	.	gene_id "PBfusion.131"; transcript_id "PBfusion.131.2";
GWHAAEP00000862	PacBio	exon	62052	62165	.	-	.	gene_id "PBfusion.131"; transcript_id "PBfusion.131.2";
GWHAAEP00000862	PacBio	exon	63585	63954	.	-	.	gene_id "PBfusion.131"; transcript_id "PBfusion.131.2";
GWHAAEP00000862	PacBio	exon	64728	64861	.	-	.	gene_id "PBfusion.131"; transcript_id "PBfusion.131.2";
GWHAAEP00000862	PacBio	exon	66028	66136	.	-	.	gene_id "PBfusion.131"; transcript_id "PBfusion.131.2";
GWHAAEP00000862	PacBio	exon	66939	67060	.	-	.	gene_id "PBfusion.131"; transcript_id "PBfusion.131.2";
GWHAAEP00000862	PacBio	exon	67571	67677	.	-	.	gene_id "PBfusion.131"; transcript_id "PBfusion.131.2";
GWHAAEP00000862	PacBio	exon	68053	68157	.	-	.	gene_id "PBfusion.131"; transcript_id "PBfusion.131.2";
GWHAAEP00000862	PacBio	exon	68256	68414	.	-	.	gene_id "PBfusion.131"; transcript_id "PBfusion.131.2";
GWHAAEP00000862	PacBio	exon	68785	68840	.	-	.	gene_id "PBfusion.131"; transcript_id "PBfusion.131.2";
GWHAAEP00000862	PacBio	exon	69408	69459	.	-	.	gene_id "PBfusion.131"; transcript_id "PBfusion.131.2";
GWHAAEP00000862	PacBio	exon	69680	70798	.	-	.	gene_id "PBfusion.131"; transcript_id "PBfusion.131.2";
GWHAAEP00001906	PacBio	transcript	13980	17097	.	-	.	gene_id "PBfusion.132"; transcript_id "PBfusion.132.1";
GWHAAEP00001906	PacBio	exon	13980	17097	.	-	.	gene_id "PBfusion.132"; transcript_id "PBfusion.132.1";
GWHAAEP00003011	PacBio	transcript	49981	53098	.	+	.	gene_id "PBfusion.132"; transcript_id "PBfusion.132.2";
GWHAAEP00003011	PacBio	exon	49981	53098	.	+	.	gene_id "PBfusion.132"; transcript_id "PBfusion.132.2";
GWHAAEP00000633	PacBio	transcript	79667	85786	.	+	.	gene_id "PBfusion.133"; transcript_id "PBfusion.133.1";
GWHAAEP00000633	PacBio	exon	79667	80010	.	+	.	gene_id "PBfusion.133"; transcript_id "PBfusion.133.1";
GWHAAEP00000633	PacBio	exon	80279	80699	.	+	.	gene_id "PBfusion.133"; transcript_id "PBfusion.133.1";
GWHAAEP00000633	PacBio	exon	81022	81306	.	+	.	gene_id "PBfusion.133"; transcript_id "PBfusion.133.1";
GWHAAEP00000633	PacBio	exon	81408	81725	.	+	.	gene_id "PBfusion.133"; transcript_id "PBfusion.133.1";
GWHAAEP00000633	PacBio	exon	82244	82471	.	+	.	gene_id "PBfusion.133"; transcript_id "PBfusion.133.1";
GWHAAEP00000633	PacBio	exon	83576	83676	.	+	.	gene_id "PBfusion.133"; transcript_id "PBfusion.133.1";
GWHAAEP00000633	PacBio	exon	84321	84438	.	+	.	gene_id "PBfusion.133"; transcript_id "PBfusion.133.1";
GWHAAEP00000633	PacBio	exon	85121	85786	.	+	.	gene_id "PBfusion.133"; transcript_id "PBfusion.133.1";
GWHAAEP00000862	PacBio	transcript	133073	139192	.	+	.	gene_id "PBfusion.133"; transcript_id "PBfusion.133.2";
GWHAAEP00000862	PacBio	exon	133073	133416	.	+	.	gene_id "PBfusion.133"; transcript_id "PBfusion.133.2";
GWHAAEP00000862	PacBio	exon	133685	134105	.	+	.	gene_id "PBfusion.133"; transcript_id "PBfusion.133.2";
GWHAAEP00000862	PacBio	exon	134428	134712	.	+	.	gene_id "PBfusion.133"; transcript_id "PBfusion.133.2";
GWHAAEP00000862	PacBio	exon	134814	135131	.	+	.	gene_id "PBfusion.133"; transcript_id "PBfusion.133.2";
GWHAAEP00000862	PacBio	exon	135650	135877	.	+	.	gene_id "PBfusion.133"; transcript_id "PBfusion.133.2";
GWHAAEP00000862	PacBio	exon	136982	137082	.	+	.	gene_id "PBfusion.133"; transcript_id "PBfusion.133.2";
GWHAAEP00000862	PacBio	exon	137727	137844	.	+	.	gene_id "PBfusion.133"; transcript_id "PBfusion.133.2";
GWHAAEP00000862	PacBio	exon	138527	139192	.	+	.	gene_id "PBfusion.133"; transcript_id "PBfusion.133.2";
GWHAAEP00001291	PacBio	transcript	39770	42348	.	+	.	gene_id "PBfusion.134"; transcript_id "PBfusion.134.1";
GWHAAEP00001291	PacBio	exon	39770	40028	.	+	.	gene_id "PBfusion.134"; transcript_id "PBfusion.134.1";
GWHAAEP00001291	PacBio	exon	40298	40414	.	+	.	gene_id "PBfusion.134"; transcript_id "PBfusion.134.1";
GWHAAEP00001291	PacBio	exon	40492	40545	.	+	.	gene_id "PBfusion.134"; transcript_id "PBfusion.134.1";
GWHAAEP00001291	PacBio	exon	41478	41594	.	+	.	gene_id "PBfusion.134"; transcript_id "PBfusion.134.1";
GWHAAEP00001291	PacBio	exon	41816	41912	.	+	.	gene_id "PBfusion.134"; transcript_id "PBfusion.134.1";
GWHAAEP00001291	PacBio	exon	42059	42348	.	+	.	gene_id "PBfusion.134"; transcript_id "PBfusion.134.1";
GWHAAEP00007848	PacBio	transcript	2424	5002	.	+	.	gene_id "PBfusion.134"; transcript_id "PBfusion.134.2";
GWHAAEP00007848	PacBio	exon	2424	2682	.	+	.	gene_id "PBfusion.134"; transcript_id "PBfusion.134.2";
GWHAAEP00007848	PacBio	exon	2952	3068	.	+	.	gene_id "PBfusion.134"; transcript_id "PBfusion.134.2";
GWHAAEP00007848	PacBio	exon	3146	3199	.	+	.	gene_id "PBfusion.134"; transcript_id "PBfusion.134.2";
GWHAAEP00007848	PacBio	exon	4132	4248	.	+	.	gene_id "PBfusion.134"; transcript_id "PBfusion.134.2";
GWHAAEP00007848	PacBio	exon	4470	4566	.	+	.	gene_id "PBfusion.134"; transcript_id "PBfusion.134.2";
GWHAAEP00007848	PacBio	exon	4713	5002	.	+	.	gene_id "PBfusion.134"; transcript_id "PBfusion.134.2";
GWHAAEP00002461	PacBio	transcript	908138	912442	.	+	.	gene_id "PBfusion.135"; transcript_id "PBfusion.135.1";
GWHAAEP00002461	PacBio	exon	908138	908272	.	+	.	gene_id "PBfusion.135"; transcript_id "PBfusion.135.1";
GWHAAEP00002461	PacBio	exon	908510	910651	.	+	.	gene_id "PBfusion.135"; transcript_id "PBfusion.135.1";
GWHAAEP00002461	PacBio	exon	910745	910992	.	+	.	gene_id "PBfusion.135"; transcript_id "PBfusion.135.1";
GWHAAEP00002461	PacBio	exon	911129	911236	.	+	.	gene_id "PBfusion.135"; transcript_id "PBfusion.135.1";
GWHAAEP00002461	PacBio	exon	911803	912442	.	+	.	gene_id "PBfusion.135"; transcript_id "PBfusion.135.1";
GWHAAEP00006596	PacBio	transcript	178156	182460	.	+	.	gene_id "PBfusion.135"; transcript_id "PBfusion.135.2";
GWHAAEP00006596	PacBio	exon	178156	178290	.	+	.	gene_id "PBfusion.135"; transcript_id "PBfusion.135.2";
GWHAAEP00006596	PacBio	exon	178528	180669	.	+	.	gene_id "PBfusion.135"; transcript_id "PBfusion.135.2";
GWHAAEP00006596	PacBio	exon	180763	181010	.	+	.	gene_id "PBfusion.135"; transcript_id "PBfusion.135.2";
GWHAAEP00006596	PacBio	exon	181147	181254	.	+	.	gene_id "PBfusion.135"; transcript_id "PBfusion.135.2";
GWHAAEP00006596	PacBio	exon	181821	182460	.	+	.	gene_id "PBfusion.135"; transcript_id "PBfusion.135.2";
GWHAAEP00000892	PacBio	transcript	310629	312826	.	-	.	gene_id "PBfusion.136"; transcript_id "PBfusion.136.1";
GWHAAEP00000892	PacBio	exon	310629	312826	.	-	.	gene_id "PBfusion.136"; transcript_id "PBfusion.136.1";
GWHAAEP00007479	PacBio	transcript	2613	4810	.	+	.	gene_id "PBfusion.136"; transcript_id "PBfusion.136.2";
GWHAAEP00007479	PacBio	exon	2613	4810	.	+	.	gene_id "PBfusion.136"; transcript_id "PBfusion.136.2";
GWHAAEP00000633	PacBio	transcript	182570	206222	.	+	.	gene_id "PBfusion.137"; transcript_id "PBfusion.137.1";
GWHAAEP00000633	PacBio	exon	182570	182621	.	+	.	gene_id "PBfusion.137"; transcript_id "PBfusion.137.1";
GWHAAEP00000633	PacBio	exon	203409	204066	.	+	.	gene_id "PBfusion.137"; transcript_id "PBfusion.137.1";
GWHAAEP00000633	PacBio	exon	204706	204878	.	+	.	gene_id "PBfusion.137"; transcript_id "PBfusion.137.1";
GWHAAEP00000633	PacBio	exon	204975	206222	.	+	.	gene_id "PBfusion.137"; transcript_id "PBfusion.137.1";
GWHAAEP00000862	PacBio	transcript	235976	259628	.	+	.	gene_id "PBfusion.137"; transcript_id "PBfusion.137.2";
GWHAAEP00000862	PacBio	exon	235976	236027	.	+	.	gene_id "PBfusion.137"; transcript_id "PBfusion.137.2";
GWHAAEP00000862	PacBio	exon	256815	257472	.	+	.	gene_id "PBfusion.137"; transcript_id "PBfusion.137.2";
GWHAAEP00000862	PacBio	exon	258112	258284	.	+	.	gene_id "PBfusion.137"; transcript_id "PBfusion.137.2";
GWHAAEP00000862	PacBio	exon	258381	259628	.	+	.	gene_id "PBfusion.137"; transcript_id "PBfusion.137.2";
GWHAAEP00002461	PacBio	transcript	850566	852964	.	+	.	gene_id "PBfusion.14"; transcript_id "PBfusion.14.1";
GWHAAEP00002461	PacBio	exon	850566	851069	.	+	.	gene_id "PBfusion.14"; transcript_id "PBfusion.14.1";
GWHAAEP00002461	PacBio	exon	851153	852964	.	+	.	gene_id "PBfusion.14"; transcript_id "PBfusion.14.1";
GWHAAEP00006596	PacBio	transcript	120592	122990	.	+	.	gene_id "PBfusion.14"; transcript_id "PBfusion.14.2";
GWHAAEP00006596	PacBio	exon	120592	121095	.	+	.	gene_id "PBfusion.14"; transcript_id "PBfusion.14.2";
GWHAAEP00006596	PacBio	exon	121179	122990	.	+	.	gene_id "PBfusion.14"; transcript_id "PBfusion.14.2";
GWHAAEP00000633	PacBio	transcript	73723	77576	.	+	.	gene_id "PBfusion.15"; transcript_id "PBfusion.15.1";
GWHAAEP00000633	PacBio	exon	73723	73748	.	+	.	gene_id "PBfusion.15"; transcript_id "PBfusion.15.1";
GWHAAEP00000633	PacBio	exon	74202	74300	.	+	.	gene_id "PBfusion.15"; transcript_id "PBfusion.15.1";
GWHAAEP00000633	PacBio	exon	74608	74649	.	+	.	gene_id "PBfusion.15"; transcript_id "PBfusion.15.1";
GWHAAEP00000633	PacBio	exon	75042	75221	.	+	.	gene_id "PBfusion.15"; transcript_id "PBfusion.15.1";
GWHAAEP00000633	PacBio	exon	75311	75475	.	+	.	gene_id "PBfusion.15"; transcript_id "PBfusion.15.1";
GWHAAEP00000633	PacBio	exon	75850	76074	.	+	.	gene_id "PBfusion.15"; transcript_id "PBfusion.15.1";
GWHAAEP00000633	PacBio	exon	77344	77576	.	+	.	gene_id "PBfusion.15"; transcript_id "PBfusion.15.1";
GWHAAEP00000862	PacBio	transcript	127129	130982	.	+	.	gene_id "PBfusion.15"; transcript_id "PBfusion.15.2";
GWHAAEP00000862	PacBio	exon	127129	127154	.	+	.	gene_id "PBfusion.15"; transcript_id "PBfusion.15.2";
GWHAAEP00000862	PacBio	exon	127608	127706	.	+	.	gene_id "PBfusion.15"; transcript_id "PBfusion.15.2";
GWHAAEP00000862	PacBio	exon	128014	128055	.	+	.	gene_id "PBfusion.15"; transcript_id "PBfusion.15.2";
GWHAAEP00000862	PacBio	exon	128448	128627	.	+	.	gene_id "PBfusion.15"; transcript_id "PBfusion.15.2";
GWHAAEP00000862	PacBio	exon	128717	128881	.	+	.	gene_id "PBfusion.15"; transcript_id "PBfusion.15.2";
GWHAAEP00000862	PacBio	exon	129256	129480	.	+	.	gene_id "PBfusion.15"; transcript_id "PBfusion.15.2";
GWHAAEP00000862	PacBio	exon	130750	130982	.	+	.	gene_id "PBfusion.15"; transcript_id "PBfusion.15.2";
GWHAAEP00001291	PacBio	transcript	37620	42348	.	+	.	gene_id "PBfusion.16"; transcript_id "PBfusion.16.1";
GWHAAEP00001291	PacBio	exon	37620	37803	.	+	.	gene_id "PBfusion.16"; transcript_id "PBfusion.16.1";
GWHAAEP00001291	PacBio	exon	38296	38445	.	+	.	gene_id "PBfusion.16"; transcript_id "PBfusion.16.1";
GWHAAEP00001291	PacBio	exon	38666	38929	.	+	.	gene_id "PBfusion.16"; transcript_id "PBfusion.16.1";
GWHAAEP00001291	PacBio	exon	39016	39083	.	+	.	gene_id "PBfusion.16"; transcript_id "PBfusion.16.1";
GWHAAEP00001291	PacBio	exon	39171	39498	.	+	.	gene_id "PBfusion.16"; transcript_id "PBfusion.16.1";
GWHAAEP00001291	PacBio	exon	39588	39800	.	+	.	gene_id "PBfusion.16"; transcript_id "PBfusion.16.1";
GWHAAEP00001291	PacBio	exon	39891	40028	.	+	.	gene_id "PBfusion.16"; transcript_id "PBfusion.16.1";
GWHAAEP00001291	PacBio	exon	40298	40414	.	+	.	gene_id "PBfusion.16"; transcript_id "PBfusion.16.1";
GWHAAEP00001291	PacBio	exon	40492	40545	.	+	.	gene_id "PBfusion.16"; transcript_id "PBfusion.16.1";
GWHAAEP00001291	PacBio	exon	41478	41594	.	+	.	gene_id "PBfusion.16"; transcript_id "PBfusion.16.1";
GWHAAEP00001291	PacBio	exon	41816	41912	.	+	.	gene_id "PBfusion.16"; transcript_id "PBfusion.16.1";
GWHAAEP00001291	PacBio	exon	42059	42348	.	+	.	gene_id "PBfusion.16"; transcript_id "PBfusion.16.1";
GWHAAEP00007848	PacBio	transcript	274	5002	.	+	.	gene_id "PBfusion.16"; transcript_id "PBfusion.16.2";
GWHAAEP00007848	PacBio	exon	274	457	.	+	.	gene_id "PBfusion.16"; transcript_id "PBfusion.16.2";
GWHAAEP00007848	PacBio	exon	950	1099	.	+	.	gene_id "PBfusion.16"; transcript_id "PBfusion.16.2";
GWHAAEP00007848	PacBio	exon	1320	1583	.	+	.	gene_id "PBfusion.16"; transcript_id "PBfusion.16.2";
GWHAAEP00007848	PacBio	exon	1670	1737	.	+	.	gene_id "PBfusion.16"; transcript_id "PBfusion.16.2";
GWHAAEP00007848	PacBio	exon	1825	2152	.	+	.	gene_id "PBfusion.16"; transcript_id "PBfusion.16.2";
GWHAAEP00007848	PacBio	exon	2242	2454	.	+	.	gene_id "PBfusion.16"; transcript_id "PBfusion.16.2";
GWHAAEP00007848	PacBio	exon	2545	2682	.	+	.	gene_id "PBfusion.16"; transcript_id "PBfusion.16.2";
GWHAAEP00007848	PacBio	exon	2952	3068	.	+	.	gene_id "PBfusion.16"; transcript_id "PBfusion.16.2";
GWHAAEP00007848	PacBio	exon	3146	3199	.	+	.	gene_id "PBfusion.16"; transcript_id "PBfusion.16.2";
GWHAAEP00007848	PacBio	exon	4132	4248	.	+	.	gene_id "PBfusion.16"; transcript_id "PBfusion.16.2";
GWHAAEP00007848	PacBio	exon	4470	4566	.	+	.	gene_id "PBfusion.16"; transcript_id "PBfusion.16.2";
GWHAAEP00007848	PacBio	exon	4713	5002	.	+	.	gene_id "PBfusion.16"; transcript_id "PBfusion.16.2";
GWHAAEP00000633	PacBio	transcript	67963	72735	.	+	.	gene_id "PBfusion.17"; transcript_id "PBfusion.17.1";
GWHAAEP00000633	PacBio	exon	67963	69448	.	+	.	gene_id "PBfusion.17"; transcript_id "PBfusion.17.1";
GWHAAEP00000633	PacBio	exon	70365	70584	.	+	.	gene_id "PBfusion.17"; transcript_id "PBfusion.17.1";
GWHAAEP00000633	PacBio	exon	71184	72735	.	+	.	gene_id "PBfusion.17"; transcript_id "PBfusion.17.1";
GWHAAEP00000862	PacBio	transcript	121369	126141	.	+	.	gene_id "PBfusion.17"; transcript_id "PBfusion.17.2";
GWHAAEP00000862	PacBio	exon	121369	122854	.	+	.	gene_id "PBfusion.17"; transcript_id "PBfusion.17.2";
GWHAAEP00000862	PacBio	exon	123771	123990	.	+	.	gene_id "PBfusion.17"; transcript_id "PBfusion.17.2";
GWHAAEP00000862	PacBio	exon	124590	126141	.	+	.	gene_id "PBfusion.17"; transcript_id "PBfusion.17.2";
GWHAAEP00000590	PacBio	transcript	132542	135839	.	-	.	gene_id "PBfusion.10"; transcript_id "PBfusion.10.1";
GWHAAEP00000590	PacBio	exon	132542	134676	.	-	.	gene_id "PBfusion.10"; transcript_id "PBfusion.10.1";
GWHAAEP00000590	PacBio	exon	134751	135152	.	-	.	gene_id "PBfusion.10"; transcript_id "PBfusion.10.1";
GWHAAEP00000590	PacBio	exon	135786	135839	.	-	.	gene_id "PBfusion.10"; transcript_id "PBfusion.10.1";
GWHAAEP00002135	PacBio	transcript	18919	22216	.	+	.	gene_id "PBfusion.10"; transcript_id "PBfusion.10.2";
GWHAAEP00002135	PacBio	exon	18919	18972	.	+	.	gene_id "PBfusion.10"; transcript_id "PBfusion.10.2";
GWHAAEP00002135	PacBio	exon	19606	20007	.	+	.	gene_id "PBfusion.10"; transcript_id "PBfusion.10.2";
GWHAAEP00002135	PacBio	exon	20082	22216	.	+	.	gene_id "PBfusion.10"; transcript_id "PBfusion.10.2";
GWHAAEP00001395	PacBio	transcript	100257	103360	.	-	.	gene_id "PBfusion.11"; transcript_id "PBfusion.11.1";
GWHAAEP00001395	PacBio	exon	100257	100533	.	-	.	gene_id "PBfusion.11"; transcript_id "PBfusion.11.1";
GWHAAEP00001395	PacBio	exon	100611	100844	.	-	.	gene_id "PBfusion.11"; transcript_id "PBfusion.11.1";
GWHAAEP00001395	PacBio	exon	101372	101625	.	-	.	gene_id "PBfusion.11"; transcript_id "PBfusion.11.1";
GWHAAEP00001395	PacBio	exon	101909	101974	.	-	.	gene_id "PBfusion.11"; transcript_id "PBfusion.11.1";
GWHAAEP00001395	PacBio	exon	102198	102401	.	-	.	gene_id "PBfusion.11"; transcript_id "PBfusion.11.1";
GWHAAEP00001395	PacBio	exon	102972	103360	.	-	.	gene_id "PBfusion.11"; transcript_id "PBfusion.11.1";
GWHAAEP00006073	PacBio	transcript	441	3744	.	-	.	gene_id "PBfusion.11"; transcript_id "PBfusion.11.2";
GWHAAEP00006073	PacBio	exon	441	717	.	-	.	gene_id "PBfusion.11"; transcript_id "PBfusion.11.2";
GWHAAEP00006073	PacBio	exon	795	1028	.	-	.	gene_id "PBfusion.11"; transcript_id "PBfusion.11.2";
GWHAAEP00006073	PacBio	exon	1756	2009	.	-	.	gene_id "PBfusion.11"; transcript_id "PBfusion.11.2";
GWHAAEP00006073	PacBio	exon	2293	2358	.	-	.	gene_id "PBfusion.11"; transcript_id "PBfusion.11.2";
GWHAAEP00006073	PacBio	exon	2582	2785	.	-	.	gene_id "PBfusion.11"; transcript_id "PBfusion.11.2";
GWHAAEP00006073	PacBio	exon	3356	3744	.	-	.	gene_id "PBfusion.11"; transcript_id "PBfusion.11.2";
GWHAAEP00002461	PacBio	transcript	906943	912442	.	+	.	gene_id "PBfusion.12"; transcript_id "PBfusion.12.1";
GWHAAEP00002461	PacBio	exon	906943	907981	.	+	.	gene_id "PBfusion.12"; transcript_id "PBfusion.12.1";
GWHAAEP00002461	PacBio	exon	908136	908272	.	+	.	gene_id "PBfusion.12"; transcript_id "PBfusion.12.1";
GWHAAEP00002461	PacBio	exon	908510	908773	.	+	.	gene_id "PBfusion.12"; transcript_id "PBfusion.12.1";
GWHAAEP00002461	PacBio	exon	908852	910405	.	+	.	gene_id "PBfusion.12"; transcript_id "PBfusion.12.1";
GWHAAEP00002461	PacBio	exon	910603	910651	.	+	.	gene_id "PBfusion.12"; transcript_id "PBfusion.12.1";
GWHAAEP00002461	PacBio	exon	910745	910992	.	+	.	gene_id "PBfusion.12"; transcript_id "PBfusion.12.1";
GWHAAEP00002461	PacBio	exon	911129	911236	.	+	.	gene_id "PBfusion.12"; transcript_id "PBfusion.12.1";
GWHAAEP00002461	PacBio	exon	911803	912442	.	+	.	gene_id "PBfusion.12"; transcript_id "PBfusion.12.1";
GWHAAEP00006596	PacBio	transcript	176961	182460	.	+	.	gene_id "PBfusion.12"; transcript_id "PBfusion.12.2";
GWHAAEP00006596	PacBio	exon	176961	177999	.	+	.	gene_id "PBfusion.12"; transcript_id "PBfusion.12.2";
GWHAAEP00006596	PacBio	exon	178154	178290	.	+	.	gene_id "PBfusion.12"; transcript_id "PBfusion.12.2";
GWHAAEP00006596	PacBio	exon	178528	178791	.	+	.	gene_id "PBfusion.12"; transcript_id "PBfusion.12.2";
GWHAAEP00006596	PacBio	exon	178870	180423	.	+	.	gene_id "PBfusion.12"; transcript_id "PBfusion.12.2";
GWHAAEP00006596	PacBio	exon	180621	180669	.	+	.	gene_id "PBfusion.12"; transcript_id "PBfusion.12.2";
GWHAAEP00006596	PacBio	exon	180763	181010	.	+	.	gene_id "PBfusion.12"; transcript_id "PBfusion.12.2";
GWHAAEP00006596	PacBio	exon	181147	181254	.	+	.	gene_id "PBfusion.12"; transcript_id "PBfusion.12.2";
GWHAAEP00006596	PacBio	exon	181821	182460	.	+	.	gene_id "PBfusion.12"; transcript_id "PBfusion.12.2";
GWHAAEP00000633	PacBio	transcript	7113	17393	.	-	.	gene_id "PBfusion.13"; transcript_id "PBfusion.13.1";
GWHAAEP00000633	PacBio	exon	7113	7985	.	-	.	gene_id "PBfusion.13"; transcript_id "PBfusion.13.1";
GWHAAEP00000633	PacBio	exon	8109	8194	.	-	.	gene_id "PBfusion.13"; transcript_id "PBfusion.13.1";
GWHAAEP00000633	PacBio	exon	8646	8759	.	-	.	gene_id "PBfusion.13"; transcript_id "PBfusion.13.1";
GWHAAEP00000633	PacBio	exon	10179	10548	.	-	.	gene_id "PBfusion.13"; transcript_id "PBfusion.13.1";
GWHAAEP00000633	PacBio	exon	11322	11455	.	-	.	gene_id "PBfusion.13"; transcript_id "PBfusion.13.1";
GWHAAEP00000633	PacBio	exon	12622	12730	.	-	.	gene_id "PBfusion.13"; transcript_id "PBfusion.13.1";
GWHAAEP00000633	PacBio	exon	13533	13654	.	-	.	gene_id "PBfusion.13"; transcript_id "PBfusion.13.1";
GWHAAEP00000633	PacBio	exon	14165	14271	.	-	.	gene_id "PBfusion.13"; transcript_id "PBfusion.13.1";
GWHAAEP00000633	PacBio	exon	14647	14751	.	-	.	gene_id "PBfusion.13"; transcript_id "PBfusion.13.1";
GWHAAEP00000633	PacBio	exon	14850	15008	.	-	.	gene_id "PBfusion.13"; transcript_id "PBfusion.13.1";
GWHAAEP00000633	PacBio	exon	15379	16053	.	-	.	gene_id "PBfusion.13"; transcript_id "PBfusion.13.1";
GWHAAEP00000633	PacBio	exon	16274	17393	.	-	.	gene_id "PBfusion.13"; transcript_id "PBfusion.13.1";
GWHAAEP00000862	PacBio	transcript	60519	70799	.	-	.	gene_id "PBfusion.13"; transcript_id "PBfusion.13.2";
GWHAAEP00000862	PacBio	exon	60519	61391	.	-	.	gene_id "PBfusion.13"; transcript_id "PBfusion.13.2";
GWHAAEP00000862	PacBio	exon	61515	61600	.	-	.	gene_id "PBfusion.13"; transcript_id "PBfusion.13.2";
GWHAAEP00000862	PacBio	exon	62052	62165	.	-	.	gene_id "PBfusion.13"; transcript_id "PBfusion.13.2";
GWHAAEP00000862	PacBio	exon	63585	63954	.	-	.	gene_id "PBfusion.13"; transcript_id "PBfusion.13.2";
GWHAAEP00000862	PacBio	exon	64728	64861	.	-	.	gene_id "PBfusion.13"; transcript_id "PBfusion.13.2";
GWHAAEP00000862	PacBio	exon	66028	66136	.	-	.	gene_id "PBfusion.13"; transcript_id "PBfusion.13.2";
GWHAAEP00000862	PacBio	exon	66939	67060	.	-	.	gene_id "PBfusion.13"; transcript_id "PBfusion.13.2";
GWHAAEP00000862	PacBio	exon	67571	67677	.	-	.	gene_id "PBfusion.13"; transcript_id "PBfusion.13.2";
GWHAAEP00000862	PacBio	exon	68053	68157	.	-	.	gene_id "PBfusion.13"; transcript_id "PBfusion.13.2";
GWHAAEP00000862	PacBio	exon	68256	68414	.	-	.	gene_id "PBfusion.13"; transcript_id "PBfusion.13.2";
GWHAAEP00000862	PacBio	exon	68785	69459	.	-	.	gene_id "PBfusion.13"; transcript_id "PBfusion.13.2";
GWHAAEP00000862	PacBio	exon	69680	70799	.	-	.	gene_id "PBfusion.13"; transcript_id "PBfusion.13.2";
GWHAAEP00004100	PacBio	transcript	361664	364105	.	-	.	gene_id "PBfusion.18"; transcript_id "PBfusion.18.1";
GWHAAEP00004100	PacBio	exon	361664	361912	.	-	.	gene_id "PBfusion.18"; transcript_id "PBfusion.18.1";
GWHAAEP00004100	PacBio	exon	362018	362160	.	-	.	gene_id "PBfusion.18"; transcript_id "PBfusion.18.1";
GWHAAEP00004100	PacBio	exon	362244	362448	.	-	.	gene_id "PBfusion.18"; transcript_id "PBfusion.18.1";
GWHAAEP00004100	PacBio	exon	362549	364105	.	-	.	gene_id "PBfusion.18"; transcript_id "PBfusion.18.1";
GWHAAEP00004300	PacBio	transcript	1249025	1251471	.	+	.	gene_id "PBfusion.18"; transcript_id "PBfusion.18.2";
GWHAAEP00004300	PacBio	exon	1249025	1250581	.	+	.	gene_id "PBfusion.18"; transcript_id "PBfusion.18.2";
GWHAAEP00004300	PacBio	exon	1250687	1250891	.	+	.	gene_id "PBfusion.18"; transcript_id "PBfusion.18.2";
GWHAAEP00004300	PacBio	exon	1250975	1251117	.	+	.	gene_id "PBfusion.18"; transcript_id "PBfusion.18.2";
GWHAAEP00004300	PacBio	exon	1251223	1251471	.	+	.	gene_id "PBfusion.18"; transcript_id "PBfusion.18.2";
GWHAAEP00002461	PacBio	transcript	953054	961177	.	-	.	gene_id "PBfusion.19"; transcript_id "PBfusion.19.1";
GWHAAEP00002461	PacBio	exon	953054	953507	.	-	.	gene_id "PBfusion.19"; transcript_id "PBfusion.19.1";
GWHAAEP00002461	PacBio	exon	954860	955364	.	-	.	gene_id "PBfusion.19"; transcript_id "PBfusion.19.1";
GWHAAEP00002461	PacBio	exon	957997	958167	.	-	.	gene_id "PBfusion.19"; transcript_id "PBfusion.19.1";
GWHAAEP00002461	PacBio	exon	958309	958473	.	-	.	gene_id "PBfusion.19"; transcript_id "PBfusion.19.1";
GWHAAEP00002461	PacBio	exon	958673	958825	.	-	.	gene_id "PBfusion.19"; transcript_id "PBfusion.19.1";
GWHAAEP00002461	PacBio	exon	959027	959179	.	-	.	gene_id "PBfusion.19"; transcript_id "PBfusion.19.1";
GWHAAEP00002461	PacBio	exon	959532	959699	.	-	.	gene_id "PBfusion.19"; transcript_id "PBfusion.19.1";
GWHAAEP00002461	PacBio	exon	959961	960110	.	-	.	gene_id "PBfusion.19"; transcript_id "PBfusion.19.1";
GWHAAEP00002461	PacBio	exon	960860	961177	.	-	.	gene_id "PBfusion.19"; transcript_id "PBfusion.19.1";
GWHAAEP00006596	PacBio	transcript	223072	231195	.	-	.	gene_id "PBfusion.19"; transcript_id "PBfusion.19.2";
GWHAAEP00006596	PacBio	exon	223072	223525	.	-	.	gene_id "PBfusion.19"; transcript_id "PBfusion.19.2";
GWHAAEP00006596	PacBio	exon	224878	225382	.	-	.	gene_id "PBfusion.19"; transcript_id "PBfusion.19.2";
GWHAAEP00006596	PacBio	exon	228015	228185	.	-	.	gene_id "PBfusion.19"; transcript_id "PBfusion.19.2";
GWHAAEP00006596	PacBio	exon	228327	228491	.	-	.	gene_id "PBfusion.19"; transcript_id "PBfusion.19.2";
GWHAAEP00006596	PacBio	exon	228691	228843	.	-	.	gene_id "PBfusion.19"; transcript_id "PBfusion.19.2";
GWHAAEP00006596	PacBio	exon	229045	229197	.	-	.	gene_id "PBfusion.19"; transcript_id "PBfusion.19.2";
GWHAAEP00006596	PacBio	exon	229550	229717	.	-	.	gene_id "PBfusion.19"; transcript_id "PBfusion.19.2";
GWHAAEP00006596	PacBio	exon	229979	230128	.	-	.	gene_id "PBfusion.19"; transcript_id "PBfusion.19.2";
GWHAAEP00006596	PacBio	exon	230878	231195	.	-	.	gene_id "PBfusion.19"; transcript_id "PBfusion.19.2";
GWHAAEP00001049	PacBio	transcript	744643	746334	.	-	.	gene_id "PBfusion.129"; transcript_id "PBfusion.129.1";
GWHAAEP00001049	PacBio	exon	744643	745568	.	-	.	gene_id "PBfusion.129"; transcript_id "PBfusion.129.1";
GWHAAEP00001049	PacBio	exon	745676	745986	.	-	.	gene_id "PBfusion.129"; transcript_id "PBfusion.129.1";
GWHAAEP00001049	PacBio	exon	746098	746334	.	-	.	gene_id "PBfusion.129"; transcript_id "PBfusion.129.1";
GWHAAEP00011146	PacBio	transcript	25449	27140	.	+	.	gene_id "PBfusion.129"; transcript_id "PBfusion.129.2";
GWHAAEP00011146	PacBio	exon	25449	25685	.	+	.	gene_id "PBfusion.129"; transcript_id "PBfusion.129.2";
GWHAAEP00011146	PacBio	exon	25797	26107	.	+	.	gene_id "PBfusion.129"; transcript_id "PBfusion.129.2";
GWHAAEP00011146	PacBio	exon	26215	27140	.	+	.	gene_id "PBfusion.129"; transcript_id "PBfusion.129.2";
GWHAAEP00002461	PacBio	transcript	773770	783706	.	-	.	gene_id "PBfusion.128"; transcript_id "PBfusion.128.1";
GWHAAEP00002461	PacBio	exon	773770	774036	.	-	.	gene_id "PBfusion.128"; transcript_id "PBfusion.128.1";
GWHAAEP00002461	PacBio	exon	774189	774354	.	-	.	gene_id "PBfusion.128"; transcript_id "PBfusion.128.1";
GWHAAEP00002461	PacBio	exon	774644	774689	.	-	.	gene_id "PBfusion.128"; transcript_id "PBfusion.128.1";
GWHAAEP00002461	PacBio	exon	774775	774857	.	-	.	gene_id "PBfusion.128"; transcript_id "PBfusion.128.1";
GWHAAEP00002461	PacBio	exon	775144	775223	.	-	.	gene_id "PBfusion.128"; transcript_id "PBfusion.128.1";
GWHAAEP00002461	PacBio	exon	775925	776033	.	-	.	gene_id "PBfusion.128"; transcript_id "PBfusion.128.1";
GWHAAEP00002461	PacBio	exon	776977	777045	.	-	.	gene_id "PBfusion.128"; transcript_id "PBfusion.128.1";
GWHAAEP00002461	PacBio	exon	777506	777556	.	-	.	gene_id "PBfusion.128"; transcript_id "PBfusion.128.1";
GWHAAEP00002461	PacBio	exon	777700	777825	.	-	.	gene_id "PBfusion.128"; transcript_id "PBfusion.128.1";
GWHAAEP00002461	PacBio	exon	777922	778045	.	-	.	gene_id "PBfusion.128"; transcript_id "PBfusion.128.1";
GWHAAEP00002461	PacBio	exon	778649	778704	.	-	.	gene_id "PBfusion.128"; transcript_id "PBfusion.128.1";
GWHAAEP00002461	PacBio	exon	778833	778897	.	-	.	gene_id "PBfusion.128"; transcript_id "PBfusion.128.1";
GWHAAEP00002461	PacBio	exon	779155	779230	.	-	.	gene_id "PBfusion.128"; transcript_id "PBfusion.128.1";
GWHAAEP00002461	PacBio	exon	780790	780866	.	-	.	gene_id "PBfusion.128"; transcript_id "PBfusion.128.1";
GWHAAEP00002461	PacBio	exon	782233	782347	.	-	.	gene_id "PBfusion.128"; transcript_id "PBfusion.128.1";
GWHAAEP00002461	PacBio	exon	782472	782648	.	-	.	gene_id "PBfusion.128"; transcript_id "PBfusion.128.1";
GWHAAEP00002461	PacBio	exon	782777	783027	.	-	.	gene_id "PBfusion.128"; transcript_id "PBfusion.128.1";
GWHAAEP00002461	PacBio	exon	783675	783706	.	-	.	gene_id "PBfusion.128"; transcript_id "PBfusion.128.1";
GWHAAEP00006596	PacBio	transcript	43796	53732	.	-	.	gene_id "PBfusion.128"; transcript_id "PBfusion.128.2";
GWHAAEP00006596	PacBio	exon	43796	44062	.	-	.	gene_id "PBfusion.128"; transcript_id "PBfusion.128.2";
GWHAAEP00006596	PacBio	exon	44215	44380	.	-	.	gene_id "PBfusion.128"; transcript_id "PBfusion.128.2";
GWHAAEP00006596	PacBio	exon	44670	44715	.	-	.	gene_id "PBfusion.128"; transcript_id "PBfusion.128.2";
GWHAAEP00006596	PacBio	exon	44801	44883	.	-	.	gene_id "PBfusion.128"; transcript_id "PBfusion.128.2";
GWHAAEP00006596	PacBio	exon	45170	45249	.	-	.	gene_id "PBfusion.128"; transcript_id "PBfusion.128.2";
GWHAAEP00006596	PacBio	exon	45951	46059	.	-	.	gene_id "PBfusion.128"; transcript_id "PBfusion.128.2";
GWHAAEP00006596	PacBio	exon	47003	47071	.	-	.	gene_id "PBfusion.128"; transcript_id "PBfusion.128.2";
GWHAAEP00006596	PacBio	exon	47532	47582	.	-	.	gene_id "PBfusion.128"; transcript_id "PBfusion.128.2";
GWHAAEP00006596	PacBio	exon	47726	47851	.	-	.	gene_id "PBfusion.128"; transcript_id "PBfusion.128.2";
GWHAAEP00006596	PacBio	exon	47948	48071	.	-	.	gene_id "PBfusion.128"; transcript_id "PBfusion.128.2";
GWHAAEP00006596	PacBio	exon	48675	48730	.	-	.	gene_id "PBfusion.128"; transcript_id "PBfusion.128.2";
GWHAAEP00006596	PacBio	exon	48859	48923	.	-	.	gene_id "PBfusion.128"; transcript_id "PBfusion.128.2";
GWHAAEP00006596	PacBio	exon	49181	49256	.	-	.	gene_id "PBfusion.128"; transcript_id "PBfusion.128.2";
GWHAAEP00006596	PacBio	exon	50816	50892	.	-	.	gene_id "PBfusion.128"; transcript_id "PBfusion.128.2";
GWHAAEP00006596	PacBio	exon	52259	52373	.	-	.	gene_id "PBfusion.128"; transcript_id "PBfusion.128.2";
GWHAAEP00006596	PacBio	exon	52498	52674	.	-	.	gene_id "PBfusion.128"; transcript_id "PBfusion.128.2";
GWHAAEP00006596	PacBio	exon	52803	53053	.	-	.	gene_id "PBfusion.128"; transcript_id "PBfusion.128.2";
GWHAAEP00006596	PacBio	exon	53701	53732	.	-	.	gene_id "PBfusion.128"; transcript_id "PBfusion.128.2";
GWHAAEP00001031	PacBio	transcript	259519	261807	.	-	.	gene_id "PBfusion.8"; transcript_id "PBfusion.8.1";
GWHAAEP00001031	PacBio	exon	259519	261529	.	-	.	gene_id "PBfusion.8"; transcript_id "PBfusion.8.1";
GWHAAEP00001031	PacBio	exon	261634	261807	.	-	.	gene_id "PBfusion.8"; transcript_id "PBfusion.8.1";
GWHAAEP00008061	PacBio	transcript	6440	8728	.	-	.	gene_id "PBfusion.8"; transcript_id "PBfusion.8.2";
GWHAAEP00008061	PacBio	exon	6440	8450	.	-	.	gene_id "PBfusion.8"; transcript_id "PBfusion.8.2";
GWHAAEP00008061	PacBio	exon	8555	8728	.	-	.	gene_id "PBfusion.8"; transcript_id "PBfusion.8.2";
GWHAAEP00004100	PacBio	transcript	361669	364104	.	-	.	gene_id "PBfusion.9"; transcript_id "PBfusion.9.1";
GWHAAEP00004100	PacBio	exon	361669	361912	.	-	.	gene_id "PBfusion.9"; transcript_id "PBfusion.9.1";
GWHAAEP00004100	PacBio	exon	362018	362448	.	-	.	gene_id "PBfusion.9"; transcript_id "PBfusion.9.1";
GWHAAEP00004100	PacBio	exon	362549	364104	.	-	.	gene_id "PBfusion.9"; transcript_id "PBfusion.9.1";
GWHAAEP00004300	PacBio	transcript	1249026	1251466	.	+	.	gene_id "PBfusion.9"; transcript_id "PBfusion.9.2";
GWHAAEP00004300	PacBio	exon	1249026	1250581	.	+	.	gene_id "PBfusion.9"; transcript_id "PBfusion.9.2";
GWHAAEP00004300	PacBio	exon	1250687	1251117	.	+	.	gene_id "PBfusion.9"; transcript_id "PBfusion.9.2";
GWHAAEP00004300	PacBio	exon	1251223	1251466	.	+	.	gene_id "PBfusion.9"; transcript_id "PBfusion.9.2";
GWHAAEP00000633	PacBio	transcript	7654	17325	.	-	.	gene_id "PBfusion.123"; transcript_id "PBfusion.123.1";
GWHAAEP00000633	PacBio	exon	7654	7985	.	-	.	gene_id "PBfusion.123"; transcript_id "PBfusion.123.1";
GWHAAEP00000633	PacBio	exon	8109	8194	.	-	.	gene_id "PBfusion.123"; transcript_id "PBfusion.123.1";
GWHAAEP00000633	PacBio	exon	8646	8759	.	-	.	gene_id "PBfusion.123"; transcript_id "PBfusion.123.1";
GWHAAEP00000633	PacBio	exon	10179	10548	.	-	.	gene_id "PBfusion.123"; transcript_id "PBfusion.123.1";
GWHAAEP00000633	PacBio	exon	11322	11455	.	-	.	gene_id "PBfusion.123"; transcript_id "PBfusion.123.1";
GWHAAEP00000633	PacBio	exon	12622	12730	.	-	.	gene_id "PBfusion.123"; transcript_id "PBfusion.123.1";
GWHAAEP00000633	PacBio	exon	13533	13654	.	-	.	gene_id "PBfusion.123"; transcript_id "PBfusion.123.1";
GWHAAEP00000633	PacBio	exon	14165	14271	.	-	.	gene_id "PBfusion.123"; transcript_id "PBfusion.123.1";
GWHAAEP00000633	PacBio	exon	14647	14751	.	-	.	gene_id "PBfusion.123"; transcript_id "PBfusion.123.1";
GWHAAEP00000633	PacBio	exon	14850	15008	.	-	.	gene_id "PBfusion.123"; transcript_id "PBfusion.123.1";
GWHAAEP00000633	PacBio	exon	15379	16053	.	-	.	gene_id "PBfusion.123"; transcript_id "PBfusion.123.1";
GWHAAEP00000633	PacBio	exon	16191	17325	.	-	.	gene_id "PBfusion.123"; transcript_id "PBfusion.123.1";
GWHAAEP00000862	PacBio	transcript	61060	70731	.	-	.	gene_id "PBfusion.123"; transcript_id "PBfusion.123.2";
GWHAAEP00000862	PacBio	exon	61060	61391	.	-	.	gene_id "PBfusion.123"; transcript_id "PBfusion.123.2";
GWHAAEP00000862	PacBio	exon	61515	61600	.	-	.	gene_id "PBfusion.123"; transcript_id "PBfusion.123.2";
GWHAAEP00000862	PacBio	exon	62052	62165	.	-	.	gene_id "PBfusion.123"; transcript_id "PBfusion.123.2";
GWHAAEP00000862	PacBio	exon	63585	63954	.	-	.	gene_id "PBfusion.123"; transcript_id "PBfusion.123.2";
GWHAAEP00000862	PacBio	exon	64728	64861	.	-	.	gene_id "PBfusion.123"; transcript_id "PBfusion.123.2";
GWHAAEP00000862	PacBio	exon	66028	66136	.	-	.	gene_id "PBfusion.123"; transcript_id "PBfusion.123.2";
GWHAAEP00000862	PacBio	exon	66939	67060	.	-	.	gene_id "PBfusion.123"; transcript_id "PBfusion.123.2";
GWHAAEP00000862	PacBio	exon	67571	67677	.	-	.	gene_id "PBfusion.123"; transcript_id "PBfusion.123.2";
GWHAAEP00000862	PacBio	exon	68053	68157	.	-	.	gene_id "PBfusion.123"; transcript_id "PBfusion.123.2";
GWHAAEP00000862	PacBio	exon	68256	68414	.	-	.	gene_id "PBfusion.123"; transcript_id "PBfusion.123.2";
GWHAAEP00000862	PacBio	exon	68785	69459	.	-	.	gene_id "PBfusion.123"; transcript_id "PBfusion.123.2";
GWHAAEP00000862	PacBio	exon	69597	70731	.	-	.	gene_id "PBfusion.123"; transcript_id "PBfusion.123.2";
GWHAAEP00000633	PacBio	transcript	146215	149866	.	-	.	gene_id "PBfusion.7"; transcript_id "PBfusion.7.1";
GWHAAEP00000633	PacBio	exon	146215	146464	.	-	.	gene_id "PBfusion.7"; transcript_id "PBfusion.7.1";
GWHAAEP00000633	PacBio	exon	146605	146686	.	-	.	gene_id "PBfusion.7"; transcript_id "PBfusion.7.1";
GWHAAEP00000633	PacBio	exon	146809	146911	.	-	.	gene_id "PBfusion.7"; transcript_id "PBfusion.7.1";
GWHAAEP00000633	PacBio	exon	147006	147168	.	-	.	gene_id "PBfusion.7"; transcript_id "PBfusion.7.1";
GWHAAEP00000633	PacBio	exon	147488	147679	.	-	.	gene_id "PBfusion.7"; transcript_id "PBfusion.7.1";
GWHAAEP00000633	PacBio	exon	149393	149866	.	-	.	gene_id "PBfusion.7"; transcript_id "PBfusion.7.1";
GWHAAEP00000862	PacBio	transcript	199621	203272	.	-	.	gene_id "PBfusion.7"; transcript_id "PBfusion.7.2";
GWHAAEP00000862	PacBio	exon	199621	199870	.	-	.	gene_id "PBfusion.7"; transcript_id "PBfusion.7.2";
GWHAAEP00000862	PacBio	exon	200011	200092	.	-	.	gene_id "PBfusion.7"; transcript_id "PBfusion.7.2";
GWHAAEP00000862	PacBio	exon	200215	200317	.	-	.	gene_id "PBfusion.7"; transcript_id "PBfusion.7.2";
GWHAAEP00000862	PacBio	exon	200412	200574	.	-	.	gene_id "PBfusion.7"; transcript_id "PBfusion.7.2";
GWHAAEP00000862	PacBio	exon	200894	201085	.	-	.	gene_id "PBfusion.7"; transcript_id "PBfusion.7.2";
GWHAAEP00000862	PacBio	exon	202799	203272	.	-	.	gene_id "PBfusion.7"; transcript_id "PBfusion.7.2";
GWHAAEP00000250	PacBio	transcript	106799	108008	.	-	.	gene_id "PBfusion.121"; transcript_id "PBfusion.121.1";
GWHAAEP00000250	PacBio	exon	106799	108008	.	-	.	gene_id "PBfusion.121"; transcript_id "PBfusion.121.1";
GWHAAEP00009122	PacBio	transcript	2638	3847	.	-	.	gene_id "PBfusion.121"; transcript_id "PBfusion.121.2";
GWHAAEP00009122	PacBio	exon	2638	3847	.	-	.	gene_id "PBfusion.121"; transcript_id "PBfusion.121.2";
GWHAAEP00000633	PacBio	transcript	22957	32669	.	-	.	gene_id "PBfusion.120"; transcript_id "PBfusion.120.1";
GWHAAEP00000633	PacBio	exon	22957	23755	.	-	.	gene_id "PBfusion.120"; transcript_id "PBfusion.120.1";
GWHAAEP00000633	PacBio	exon	24084	24205	.	-	.	gene_id "PBfusion.120"; transcript_id "PBfusion.120.1";
GWHAAEP00000633	PacBio	exon	24584	24772	.	-	.	gene_id "PBfusion.120"; transcript_id "PBfusion.120.1";
GWHAAEP00000633	PacBio	exon	25438	25531	.	-	.	gene_id "PBfusion.120"; transcript_id "PBfusion.120.1";
GWHAAEP00000633	PacBio	exon	25807	26168	.	-	.	gene_id "PBfusion.120"; transcript_id "PBfusion.120.1";
GWHAAEP00000633	PacBio	exon	26671	26805	.	-	.	gene_id "PBfusion.120"; transcript_id "PBfusion.120.1";
GWHAAEP00000633	PacBio	exon	26892	26930	.	-	.	gene_id "PBfusion.120"; transcript_id "PBfusion.120.1";
GWHAAEP00000633	PacBio	exon	27130	27195	.	-	.	gene_id "PBfusion.120"; transcript_id "PBfusion.120.1";
GWHAAEP00000633	PacBio	exon	27351	27446	.	-	.	gene_id "PBfusion.120"; transcript_id "PBfusion.120.1";
GWHAAEP00000633	PacBio	exon	27799	28035	.	-	.	gene_id "PBfusion.120"; transcript_id "PBfusion.120.1";
GWHAAEP00000633	PacBio	exon	28139	28259	.	-	.	gene_id "PBfusion.120"; transcript_id "PBfusion.120.1";
GWHAAEP00000633	PacBio	exon	28376	28411	.	-	.	gene_id "PBfusion.120"; transcript_id "PBfusion.120.1";
GWHAAEP00000633	PacBio	exon	28747	28844	.	-	.	gene_id "PBfusion.120"; transcript_id "PBfusion.120.1";
GWHAAEP00000633	PacBio	exon	29173	29472	.	-	.	gene_id "PBfusion.120"; transcript_id "PBfusion.120.1";
GWHAAEP00000633	PacBio	exon	29656	29745	.	-	.	gene_id "PBfusion.120"; transcript_id "PBfusion.120.1";
GWHAAEP00000633	PacBio	exon	29882	29947	.	-	.	gene_id "PBfusion.120"; transcript_id "PBfusion.120.1";
GWHAAEP00000633	PacBio	exon	30384	30542	.	-	.	gene_id "PBfusion.120"; transcript_id "PBfusion.120.1";
GWHAAEP00000633	PacBio	exon	31403	31512	.	-	.	gene_id "PBfusion.120"; transcript_id "PBfusion.120.1";
GWHAAEP00000633	PacBio	exon	32511	32669	.	-	.	gene_id "PBfusion.120"; transcript_id "PBfusion.120.1";
GWHAAEP00000862	PacBio	transcript	76363	86075	.	-	.	gene_id "PBfusion.120"; transcript_id "PBfusion.120.2";
GWHAAEP00000862	PacBio	exon	76363	77161	.	-	.	gene_id "PBfusion.120"; transcript_id "PBfusion.120.2";
GWHAAEP00000862	PacBio	exon	77490	77611	.	-	.	gene_id "PBfusion.120"; transcript_id "PBfusion.120.2";
GWHAAEP00000862	PacBio	exon	77990	78178	.	-	.	gene_id "PBfusion.120"; transcript_id "PBfusion.120.2";
GWHAAEP00000862	PacBio	exon	78844	78937	.	-	.	gene_id "PBfusion.120"; transcript_id "PBfusion.120.2";
GWHAAEP00000862	PacBio	exon	79213	79574	.	-	.	gene_id "PBfusion.120"; transcript_id "PBfusion.120.2";
GWHAAEP00000862	PacBio	exon	80077	80211	.	-	.	gene_id "PBfusion.120"; transcript_id "PBfusion.120.2";
GWHAAEP00000862	PacBio	exon	80298	80336	.	-	.	gene_id "PBfusion.120"; transcript_id "PBfusion.120.2";
GWHAAEP00000862	PacBio	exon	80536	80601	.	-	.	gene_id "PBfusion.120"; transcript_id "PBfusion.120.2";
GWHAAEP00000862	PacBio	exon	80757	80852	.	-	.	gene_id "PBfusion.120"; transcript_id "PBfusion.120.2";
GWHAAEP00000862	PacBio	exon	81205	81441	.	-	.	gene_id "PBfusion.120"; transcript_id "PBfusion.120.2";
GWHAAEP00000862	PacBio	exon	81545	81665	.	-	.	gene_id "PBfusion.120"; transcript_id "PBfusion.120.2";
GWHAAEP00000862	PacBio	exon	81782	81817	.	-	.	gene_id "PBfusion.120"; transcript_id "PBfusion.120.2";
GWHAAEP00000862	PacBio	exon	82153	82250	.	-	.	gene_id "PBfusion.120"; transcript_id "PBfusion.120.2";
GWHAAEP00000862	PacBio	exon	82579	82878	.	-	.	gene_id "PBfusion.120"; transcript_id "PBfusion.120.2";
GWHAAEP00000862	PacBio	exon	83062	83151	.	-	.	gene_id "PBfusion.120"; transcript_id "PBfusion.120.2";
GWHAAEP00000862	PacBio	exon	83288	83353	.	-	.	gene_id "PBfusion.120"; transcript_id "PBfusion.120.2";
GWHAAEP00000862	PacBio	exon	83790	83948	.	-	.	gene_id "PBfusion.120"; transcript_id "PBfusion.120.2";
GWHAAEP00000862	PacBio	exon	84809	84918	.	-	.	gene_id "PBfusion.120"; transcript_id "PBfusion.120.2";
GWHAAEP00000862	PacBio	exon	85917	86075	.	-	.	gene_id "PBfusion.120"; transcript_id "PBfusion.120.2";
GWHAAEP00000987	PacBio	transcript	353394	357235	.	+	.	gene_id "PBfusion.2"; transcript_id "PBfusion.2.1";
GWHAAEP00000987	PacBio	exon	353394	353622	.	+	.	gene_id "PBfusion.2"; transcript_id "PBfusion.2.1";
GWHAAEP00000987	PacBio	exon	355219	355329	.	+	.	gene_id "PBfusion.2"; transcript_id "PBfusion.2.1";
GWHAAEP00000987	PacBio	exon	356762	357235	.	+	.	gene_id "PBfusion.2"; transcript_id "PBfusion.2.1";
GWHAAEP00003174	PacBio	transcript	31770	35611	.	+	.	gene_id "PBfusion.2"; transcript_id "PBfusion.2.2";
GWHAAEP00003174	PacBio	exon	31770	31998	.	+	.	gene_id "PBfusion.2"; transcript_id "PBfusion.2.2";
GWHAAEP00003174	PacBio	exon	33595	33705	.	+	.	gene_id "PBfusion.2"; transcript_id "PBfusion.2.2";
GWHAAEP00003174	PacBio	exon	35138	35611	.	+	.	gene_id "PBfusion.2"; transcript_id "PBfusion.2.2";
GWHAAEP00001124	PacBio	transcript	6863	9363	.	+	.	gene_id "PBfusion.3"; transcript_id "PBfusion.3.1";
GWHAAEP00001124	PacBio	exon	6863	7078	.	+	.	gene_id "PBfusion.3"; transcript_id "PBfusion.3.1";
GWHAAEP00001124	PacBio	exon	7157	7264	.	+	.	gene_id "PBfusion.3"; transcript_id "PBfusion.3.1";
GWHAAEP00001124	PacBio	exon	7364	7504	.	+	.	gene_id "PBfusion.3"; transcript_id "PBfusion.3.1";
GWHAAEP00001124	PacBio	exon	7593	7703	.	+	.	gene_id "PBfusion.3"; transcript_id "PBfusion.3.1";
GWHAAEP00001124	PacBio	exon	7829	7990	.	+	.	gene_id "PBfusion.3"; transcript_id "PBfusion.3.1";
GWHAAEP00001124	PacBio	exon	8365	8467	.	+	.	gene_id "PBfusion.3"; transcript_id "PBfusion.3.1";
GWHAAEP00001124	PacBio	exon	8551	8646	.	+	.	gene_id "PBfusion.3"; transcript_id "PBfusion.3.1";
GWHAAEP00001124	PacBio	exon	8888	9363	.	+	.	gene_id "PBfusion.3"; transcript_id "PBfusion.3.1";
GWHAAEP00006491	PacBio	transcript	42355	44860	.	+	.	gene_id "PBfusion.3"; transcript_id "PBfusion.3.2";
GWHAAEP00006491	PacBio	exon	42355	42570	.	+	.	gene_id "PBfusion.3"; transcript_id "PBfusion.3.2";
GWHAAEP00006491	PacBio	exon	42649	42756	.	+	.	gene_id "PBfusion.3"; transcript_id "PBfusion.3.2";
GWHAAEP00006491	PacBio	exon	42861	43001	.	+	.	gene_id "PBfusion.3"; transcript_id "PBfusion.3.2";
GWHAAEP00006491	PacBio	exon	43090	43200	.	+	.	gene_id "PBfusion.3"; transcript_id "PBfusion.3.2";
GWHAAEP00006491	PacBio	exon	43326	43487	.	+	.	gene_id "PBfusion.3"; transcript_id "PBfusion.3.2";
GWHAAEP00006491	PacBio	exon	43862	43964	.	+	.	gene_id "PBfusion.3"; transcript_id "PBfusion.3.2";
GWHAAEP00006491	PacBio	exon	44048	44143	.	+	.	gene_id "PBfusion.3"; transcript_id "PBfusion.3.2";
GWHAAEP00006491	PacBio	exon	44385	44860	.	+	.	gene_id "PBfusion.3"; transcript_id "PBfusion.3.2";
GWHAAEP00002461	PacBio	transcript	787506	792274	.	-	.	gene_id "PBfusion.125"; transcript_id "PBfusion.125.1";
GWHAAEP00002461	PacBio	exon	787506	788728	.	-	.	gene_id "PBfusion.125"; transcript_id "PBfusion.125.1";
GWHAAEP00002461	PacBio	exon	788915	788990	.	-	.	gene_id "PBfusion.125"; transcript_id "PBfusion.125.1";
GWHAAEP00002461	PacBio	exon	789079	789131	.	-	.	gene_id "PBfusion.125"; transcript_id "PBfusion.125.1";
GWHAAEP00002461	PacBio	exon	790489	790545	.	-	.	gene_id "PBfusion.125"; transcript_id "PBfusion.125.1";
GWHAAEP00002461	PacBio	exon	790627	790695	.	-	.	gene_id "PBfusion.125"; transcript_id "PBfusion.125.1";
GWHAAEP00002461	PacBio	exon	790787	791070	.	-	.	gene_id "PBfusion.125"; transcript_id "PBfusion.125.1";
GWHAAEP00002461	PacBio	exon	791180	791573	.	-	.	gene_id "PBfusion.125"; transcript_id "PBfusion.125.1";
GWHAAEP00002461	PacBio	exon	791941	792274	.	-	.	gene_id "PBfusion.125"; transcript_id "PBfusion.125.1";
GWHAAEP00006596	PacBio	transcript	57532	62300	.	-	.	gene_id "PBfusion.125"; transcript_id "PBfusion.125.2";
GWHAAEP00006596	PacBio	exon	57532	58754	.	-	.	gene_id "PBfusion.125"; transcript_id "PBfusion.125.2";
GWHAAEP00006596	PacBio	exon	58941	59016	.	-	.	gene_id "PBfusion.125"; transcript_id "PBfusion.125.2";
GWHAAEP00006596	PacBio	exon	59105	59157	.	-	.	gene_id "PBfusion.125"; transcript_id "PBfusion.125.2";
GWHAAEP00006596	PacBio	exon	60515	60571	.	-	.	gene_id "PBfusion.125"; transcript_id "PBfusion.125.2";
GWHAAEP00006596	PacBio	exon	60653	60721	.	-	.	gene_id "PBfusion.125"; transcript_id "PBfusion.125.2";
GWHAAEP00006596	PacBio	exon	60813	61096	.	-	.	gene_id "PBfusion.125"; transcript_id "PBfusion.125.2";
GWHAAEP00006596	PacBio	exon	61206	61599	.	-	.	gene_id "PBfusion.125"; transcript_id "PBfusion.125.2";
GWHAAEP00006596	PacBio	exon	61967	62300	.	-	.	gene_id "PBfusion.125"; transcript_id "PBfusion.125.2";
GWHAAEP00000633	PacBio	transcript	7553	17393	.	-	.	gene_id "PBfusion.124"; transcript_id "PBfusion.124.1";
GWHAAEP00000633	PacBio	exon	7553	7985	.	-	.	gene_id "PBfusion.124"; transcript_id "PBfusion.124.1";
GWHAAEP00000633	PacBio	exon	8109	8194	.	-	.	gene_id "PBfusion.124"; transcript_id "PBfusion.124.1";
GWHAAEP00000633	PacBio	exon	8646	8759	.	-	.	gene_id "PBfusion.124"; transcript_id "PBfusion.124.1";
GWHAAEP00000633	PacBio	exon	10179	10548	.	-	.	gene_id "PBfusion.124"; transcript_id "PBfusion.124.1";
GWHAAEP00000633	PacBio	exon	11322	11455	.	-	.	gene_id "PBfusion.124"; transcript_id "PBfusion.124.1";
GWHAAEP00000633	PacBio	exon	12622	12730	.	-	.	gene_id "PBfusion.124"; transcript_id "PBfusion.124.1";
GWHAAEP00000633	PacBio	exon	13533	13654	.	-	.	gene_id "PBfusion.124"; transcript_id "PBfusion.124.1";
GWHAAEP00000633	PacBio	exon	14165	14271	.	-	.	gene_id "PBfusion.124"; transcript_id "PBfusion.124.1";
GWHAAEP00000633	PacBio	exon	14647	14751	.	-	.	gene_id "PBfusion.124"; transcript_id "PBfusion.124.1";
GWHAAEP00000633	PacBio	exon	14850	15008	.	-	.	gene_id "PBfusion.124"; transcript_id "PBfusion.124.1";
GWHAAEP00000633	PacBio	exon	15379	15434	.	-	.	gene_id "PBfusion.124"; transcript_id "PBfusion.124.1";
GWHAAEP00000633	PacBio	exon	15804	16053	.	-	.	gene_id "PBfusion.124"; transcript_id "PBfusion.124.1";
GWHAAEP00000633	PacBio	exon	16274	17393	.	-	.	gene_id "PBfusion.124"; transcript_id "PBfusion.124.1";
GWHAAEP00000862	PacBio	transcript	60959	70799	.	-	.	gene_id "PBfusion.124"; transcript_id "PBfusion.124.2";
GWHAAEP00000862	PacBio	exon	60959	61391	.	-	.	gene_id "PBfusion.124"; transcript_id "PBfusion.124.2";
GWHAAEP00000862	PacBio	exon	61515	61600	.	-	.	gene_id "PBfusion.124"; transcript_id "PBfusion.124.2";
GWHAAEP00000862	PacBio	exon	62052	62165	.	-	.	gene_id "PBfusion.124"; transcript_id "PBfusion.124.2";
GWHAAEP00000862	PacBio	exon	63585	63954	.	-	.	gene_id "PBfusion.124"; transcript_id "PBfusion.124.2";
GWHAAEP00000862	PacBio	exon	64728	64861	.	-	.	gene_id "PBfusion.124"; transcript_id "PBfusion.124.2";
GWHAAEP00000862	PacBio	exon	66028	66136	.	-	.	gene_id "PBfusion.124"; transcript_id "PBfusion.124.2";
GWHAAEP00000862	PacBio	exon	66939	67060	.	-	.	gene_id "PBfusion.124"; transcript_id "PBfusion.124.2";
GWHAAEP00000862	PacBio	exon	67571	67677	.	-	.	gene_id "PBfusion.124"; transcript_id "PBfusion.124.2";
GWHAAEP00000862	PacBio	exon	68053	68157	.	-	.	gene_id "PBfusion.124"; transcript_id "PBfusion.124.2";
GWHAAEP00000862	PacBio	exon	68256	68414	.	-	.	gene_id "PBfusion.124"; transcript_id "PBfusion.124.2";
GWHAAEP00000862	PacBio	exon	68785	68840	.	-	.	gene_id "PBfusion.124"; transcript_id "PBfusion.124.2";
GWHAAEP00000862	PacBio	exon	69210	69459	.	-	.	gene_id "PBfusion.124"; transcript_id "PBfusion.124.2";
GWHAAEP00000862	PacBio	exon	69680	70799	.	-	.	gene_id "PBfusion.124"; transcript_id "PBfusion.124.2";
GWHAAEP00001936	PacBio	transcript	1038820	1043157	.	-	.	gene_id "PBfusion.6"; transcript_id "PBfusion.6.1";
GWHAAEP00001936	PacBio	exon	1038820	1039366	.	-	.	gene_id "PBfusion.6"; transcript_id "PBfusion.6.1";
GWHAAEP00001936	PacBio	exon	1039907	1040014	.	-	.	gene_id "PBfusion.6"; transcript_id "PBfusion.6.1";
GWHAAEP00001936	PacBio	exon	1040112	1040666	.	-	.	gene_id "PBfusion.6"; transcript_id "PBfusion.6.1";
GWHAAEP00001936	PacBio	exon	1040866	1041000	.	-	.	gene_id "PBfusion.6"; transcript_id "PBfusion.6.1";
GWHAAEP00001936	PacBio	exon	1041098	1041220	.	-	.	gene_id "PBfusion.6"; transcript_id "PBfusion.6.1";
GWHAAEP00001936	PacBio	exon	1041313	1041774	.	-	.	gene_id "PBfusion.6"; transcript_id "PBfusion.6.1";
GWHAAEP00001936	PacBio	exon	1042083	1042162	.	-	.	gene_id "PBfusion.6"; transcript_id "PBfusion.6.1";
GWHAAEP00001936	PacBio	exon	1042868	1043157	.	-	.	gene_id "PBfusion.6"; transcript_id "PBfusion.6.1";
GWHAAEP00007924	PacBio	transcript	71069	75406	.	-	.	gene_id "PBfusion.6"; transcript_id "PBfusion.6.2";
GWHAAEP00007924	PacBio	exon	71069	71615	.	-	.	gene_id "PBfusion.6"; transcript_id "PBfusion.6.2";
GWHAAEP00007924	PacBio	exon	72156	72263	.	-	.	gene_id "PBfusion.6"; transcript_id "PBfusion.6.2";
GWHAAEP00007924	PacBio	exon	72361	72915	.	-	.	gene_id "PBfusion.6"; transcript_id "PBfusion.6.2";
GWHAAEP00007924	PacBio	exon	73115	73249	.	-	.	gene_id "PBfusion.6"; transcript_id "PBfusion.6.2";
GWHAAEP00007924	PacBio	exon	73347	73469	.	-	.	gene_id "PBfusion.6"; transcript_id "PBfusion.6.2";
GWHAAEP00007924	PacBio	exon	73562	74023	.	-	.	gene_id "PBfusion.6"; transcript_id "PBfusion.6.2";
GWHAAEP00007924	PacBio	exon	74332	74411	.	-	.	gene_id "PBfusion.6"; transcript_id "PBfusion.6.2";
GWHAAEP00007924	PacBio	exon	75117	75406	.	-	.	gene_id "PBfusion.6"; transcript_id "PBfusion.6.2";
GWHAAEP00000633	PacBio	transcript	191143	195376	.	+	.	gene_id "PBfusion.89"; transcript_id "PBfusion.89.1";
GWHAAEP00000633	PacBio	exon	191143	191419	.	+	.	gene_id "PBfusion.89"; transcript_id "PBfusion.89.1";
GWHAAEP00000633	PacBio	exon	191636	193443	.	+	.	gene_id "PBfusion.89"; transcript_id "PBfusion.89.1";
GWHAAEP00000633	PacBio	exon	194094	194263	.	+	.	gene_id "PBfusion.89"; transcript_id "PBfusion.89.1";
GWHAAEP00000633	PacBio	exon	194359	195376	.	+	.	gene_id "PBfusion.89"; transcript_id "PBfusion.89.1";
GWHAAEP00000862	PacBio	transcript	244549	248782	.	+	.	gene_id "PBfusion.89"; transcript_id "PBfusion.89.2";
GWHAAEP00000862	PacBio	exon	244549	244825	.	+	.	gene_id "PBfusion.89"; transcript_id "PBfusion.89.2";
GWHAAEP00000862	PacBio	exon	245042	246849	.	+	.	gene_id "PBfusion.89"; transcript_id "PBfusion.89.2";
GWHAAEP00000862	PacBio	exon	247500	247669	.	+	.	gene_id "PBfusion.89"; transcript_id "PBfusion.89.2";
GWHAAEP00000862	PacBio	exon	247765	248782	.	+	.	gene_id "PBfusion.89"; transcript_id "PBfusion.89.2";
GWHAAEP00000986	PacBio	transcript	939543	944732	.	-	.	gene_id "PBfusion.88"; transcript_id "PBfusion.88.1";
GWHAAEP00000986	PacBio	exon	939543	940296	.	-	.	gene_id "PBfusion.88"; transcript_id "PBfusion.88.1";
GWHAAEP00000986	PacBio	exon	940458	940989	.	-	.	gene_id "PBfusion.88"; transcript_id "PBfusion.88.1";
GWHAAEP00000986	PacBio	exon	941092	941206	.	-	.	gene_id "PBfusion.88"; transcript_id "PBfusion.88.1";
GWHAAEP00000986	PacBio	exon	941314	941389	.	-	.	gene_id "PBfusion.88"; transcript_id "PBfusion.88.1";
GWHAAEP00000986	PacBio	exon	941810	941909	.	-	.	gene_id "PBfusion.88"; transcript_id "PBfusion.88.1";
GWHAAEP00000986	PacBio	exon	942004	942107	.	-	.	gene_id "PBfusion.88"; transcript_id "PBfusion.88.1";
GWHAAEP00000986	PacBio	exon	942235	942323	.	-	.	gene_id "PBfusion.88"; transcript_id "PBfusion.88.1";
GWHAAEP00000986	PacBio	exon	942447	943417	.	-	.	gene_id "PBfusion.88"; transcript_id "PBfusion.88.1";
GWHAAEP00000986	PacBio	exon	943711	943797	.	-	.	gene_id "PBfusion.88"; transcript_id "PBfusion.88.1";
GWHAAEP00000986	PacBio	exon	944280	944732	.	-	.	gene_id "PBfusion.88"; transcript_id "PBfusion.88.1";
GWHAAEP00004764	PacBio	transcript	1511	6704	.	-	.	gene_id "PBfusion.88"; transcript_id "PBfusion.88.2";
GWHAAEP00004764	PacBio	exon	1511	2264	.	-	.	gene_id "PBfusion.88"; transcript_id "PBfusion.88.2";
GWHAAEP00004764	PacBio	exon	2429	2960	.	-	.	gene_id "PBfusion.88"; transcript_id "PBfusion.88.2";
GWHAAEP00004764	PacBio	exon	3063	3177	.	-	.	gene_id "PBfusion.88"; transcript_id "PBfusion.88.2";
GWHAAEP00004764	PacBio	exon	3286	3361	.	-	.	gene_id "PBfusion.88"; transcript_id "PBfusion.88.2";
GWHAAEP00004764	PacBio	exon	3782	3881	.	-	.	gene_id "PBfusion.88"; transcript_id "PBfusion.88.2";
GWHAAEP00004764	PacBio	exon	3976	4079	.	-	.	gene_id "PBfusion.88"; transcript_id "PBfusion.88.2";
GWHAAEP00004764	PacBio	exon	4207	4295	.	-	.	gene_id "PBfusion.88"; transcript_id "PBfusion.88.2";
GWHAAEP00004764	PacBio	exon	4419	5389	.	-	.	gene_id "PBfusion.88"; transcript_id "PBfusion.88.2";
GWHAAEP00004764	PacBio	exon	5683	5769	.	-	.	gene_id "PBfusion.88"; transcript_id "PBfusion.88.2";
GWHAAEP00004764	PacBio	exon	6252	6704	.	-	.	gene_id "PBfusion.88"; transcript_id "PBfusion.88.2";
GWHAAEP00001527	PacBio	transcript	1207	4279	.	-	.	gene_id "PBfusion.87"; transcript_id "PBfusion.87.1";
GWHAAEP00001527	PacBio	exon	1207	4279	.	-	.	gene_id "PBfusion.87"; transcript_id "PBfusion.87.1";
GWHAAEP00001630	PacBio	transcript	912099	915171	.	-	.	gene_id "PBfusion.87"; transcript_id "PBfusion.87.2";
GWHAAEP00001630	PacBio	exon	912099	915171	.	-	.	gene_id "PBfusion.87"; transcript_id "PBfusion.87.2";
GWHAAEP00000633	PacBio	transcript	168389	171091	.	+	.	gene_id "PBfusion.86"; transcript_id "PBfusion.86.1";
GWHAAEP00000633	PacBio	exon	168389	168575	.	+	.	gene_id "PBfusion.86"; transcript_id "PBfusion.86.1";
GWHAAEP00000633	PacBio	exon	168663	168780	.	+	.	gene_id "PBfusion.86"; transcript_id "PBfusion.86.1";
GWHAAEP00000633	PacBio	exon	168856	171091	.	+	.	gene_id "PBfusion.86"; transcript_id "PBfusion.86.1";
GWHAAEP00000862	PacBio	transcript	221795	224497	.	+	.	gene_id "PBfusion.86"; transcript_id "PBfusion.86.2";
GWHAAEP00000862	PacBio	exon	221795	221981	.	+	.	gene_id "PBfusion.86"; transcript_id "PBfusion.86.2";
GWHAAEP00000862	PacBio	exon	222069	222186	.	+	.	gene_id "PBfusion.86"; transcript_id "PBfusion.86.2";
GWHAAEP00000862	PacBio	exon	222262	224497	.	+	.	gene_id "PBfusion.86"; transcript_id "PBfusion.86.2";
GWHAAEP00002461	PacBio	transcript	850459	860206	.	+	.	gene_id "PBfusion.85"; transcript_id "PBfusion.85.1";
GWHAAEP00002461	PacBio	exon	850459	850727	.	+	.	gene_id "PBfusion.85"; transcript_id "PBfusion.85.1";
GWHAAEP00002461	PacBio	exon	850959	851069	.	+	.	gene_id "PBfusion.85"; transcript_id "PBfusion.85.1";
GWHAAEP00002461	PacBio	exon	851153	851331	.	+	.	gene_id "PBfusion.85"; transcript_id "PBfusion.85.1";
GWHAAEP00002461	PacBio	exon	851813	851962	.	+	.	gene_id "PBfusion.85"; transcript_id "PBfusion.85.1";
GWHAAEP00002461	PacBio	exon	852832	852920	.	+	.	gene_id "PBfusion.85"; transcript_id "PBfusion.85.1";
GWHAAEP00002461	PacBio	exon	853075	853184	.	+	.	gene_id "PBfusion.85"; transcript_id "PBfusion.85.1";
GWHAAEP00002461	PacBio	exon	853336	853430	.	+	.	gene_id "PBfusion.85"; transcript_id "PBfusion.85.1";
GWHAAEP00002461	PacBio	exon	854314	854369	.	+	.	gene_id "PBfusion.85"; transcript_id "PBfusion.85.1";
GWHAAEP00002461	PacBio	exon	854581	854746	.	+	.	gene_id "PBfusion.85"; transcript_id "PBfusion.85.1";
GWHAAEP00002461	PacBio	exon	855877	855969	.	+	.	gene_id "PBfusion.85"; transcript_id "PBfusion.85.1";
GWHAAEP00002461	PacBio	exon	856352	856480	.	+	.	gene_id "PBfusion.85"; transcript_id "PBfusion.85.1";
GWHAAEP00002461	PacBio	exon	856756	856875	.	+	.	gene_id "PBfusion.85"; transcript_id "PBfusion.85.1";
GWHAAEP00002461	PacBio	exon	857225	857305	.	+	.	gene_id "PBfusion.85"; transcript_id "PBfusion.85.1";
GWHAAEP00002461	PacBio	exon	857884	857991	.	+	.	gene_id "PBfusion.85"; transcript_id "PBfusion.85.1";
GWHAAEP00002461	PacBio	exon	858132	858275	.	+	.	gene_id "PBfusion.85"; transcript_id "PBfusion.85.1";
GWHAAEP00002461	PacBio	exon	858363	858464	.	+	.	gene_id "PBfusion.85"; transcript_id "PBfusion.85.1";
GWHAAEP00002461	PacBio	exon	858883	858962	.	+	.	gene_id "PBfusion.85"; transcript_id "PBfusion.85.1";
GWHAAEP00002461	PacBio	exon	859624	859716	.	+	.	gene_id "PBfusion.85"; transcript_id "PBfusion.85.1";
GWHAAEP00002461	PacBio	exon	859800	859873	.	+	.	gene_id "PBfusion.85"; transcript_id "PBfusion.85.1";
GWHAAEP00002461	PacBio	exon	859960	860206	.	+	.	gene_id "PBfusion.85"; transcript_id "PBfusion.85.1";
GWHAAEP00006596	PacBio	transcript	120485	130232	.	+	.	gene_id "PBfusion.85"; transcript_id "PBfusion.85.2";
GWHAAEP00006596	PacBio	exon	120485	120753	.	+	.	gene_id "PBfusion.85"; transcript_id "PBfusion.85.2";
GWHAAEP00006596	PacBio	exon	120985	121095	.	+	.	gene_id "PBfusion.85"; transcript_id "PBfusion.85.2";
GWHAAEP00006596	PacBio	exon	121179	121357	.	+	.	gene_id "PBfusion.85"; transcript_id "PBfusion.85.2";
GWHAAEP00006596	PacBio	exon	121839	121988	.	+	.	gene_id "PBfusion.85"; transcript_id "PBfusion.85.2";
GWHAAEP00006596	PacBio	exon	122858	122946	.	+	.	gene_id "PBfusion.85"; transcript_id "PBfusion.85.2";
GWHAAEP00006596	PacBio	exon	123101	123210	.	+	.	gene_id "PBfusion.85"; transcript_id "PBfusion.85.2";
GWHAAEP00006596	PacBio	exon	123362	123456	.	+	.	gene_id "PBfusion.85"; transcript_id "PBfusion.85.2";
GWHAAEP00006596	PacBio	exon	124340	124395	.	+	.	gene_id "PBfusion.85"; transcript_id "PBfusion.85.2";
GWHAAEP00006596	PacBio	exon	124607	124772	.	+	.	gene_id "PBfusion.85"; transcript_id "PBfusion.85.2";
GWHAAEP00006596	PacBio	exon	125903	125995	.	+	.	gene_id "PBfusion.85"; transcript_id "PBfusion.85.2";
GWHAAEP00006596	PacBio	exon	126378	126506	.	+	.	gene_id "PBfusion.85"; transcript_id "PBfusion.85.2";
GWHAAEP00006596	PacBio	exon	126782	126901	.	+	.	gene_id "PBfusion.85"; transcript_id "PBfusion.85.2";
GWHAAEP00006596	PacBio	exon	127251	127331	.	+	.	gene_id "PBfusion.85"; transcript_id "PBfusion.85.2";
GWHAAEP00006596	PacBio	exon	127910	128017	.	+	.	gene_id "PBfusion.85"; transcript_id "PBfusion.85.2";
GWHAAEP00006596	PacBio	exon	128158	128301	.	+	.	gene_id "PBfusion.85"; transcript_id "PBfusion.85.2";
GWHAAEP00006596	PacBio	exon	128389	128490	.	+	.	gene_id "PBfusion.85"; transcript_id "PBfusion.85.2";
GWHAAEP00006596	PacBio	exon	128909	128988	.	+	.	gene_id "PBfusion.85"; transcript_id "PBfusion.85.2";
GWHAAEP00006596	PacBio	exon	129650	129742	.	+	.	gene_id "PBfusion.85"; transcript_id "PBfusion.85.2";
GWHAAEP00006596	PacBio	exon	129826	129899	.	+	.	gene_id "PBfusion.85"; transcript_id "PBfusion.85.2";
GWHAAEP00006596	PacBio	exon	129986	130232	.	+	.	gene_id "PBfusion.85"; transcript_id "PBfusion.85.2";
GWHAAEP00001196	PacBio	transcript	100236	102161	.	-	.	gene_id "PBfusion.84"; transcript_id "PBfusion.84.1";
GWHAAEP00001196	PacBio	exon	100236	100563	.	-	.	gene_id "PBfusion.84"; transcript_id "PBfusion.84.1";
GWHAAEP00001196	PacBio	exon	101436	101553	.	-	.	gene_id "PBfusion.84"; transcript_id "PBfusion.84.1";
GWHAAEP00001196	PacBio	exon	101666	102161	.	-	.	gene_id "PBfusion.84"; transcript_id "PBfusion.84.1";
GWHAAEP00004208	PacBio	transcript	27231	29156	.	-	.	gene_id "PBfusion.84"; transcript_id "PBfusion.84.2";
GWHAAEP00004208	PacBio	exon	27231	27558	.	-	.	gene_id "PBfusion.84"; transcript_id "PBfusion.84.2";
GWHAAEP00004208	PacBio	exon	28431	28548	.	-	.	gene_id "PBfusion.84"; transcript_id "PBfusion.84.2";
GWHAAEP00004208	PacBio	exon	28661	29156	.	-	.	gene_id "PBfusion.84"; transcript_id "PBfusion.84.2";
GWHAAEP00001135	PacBio	transcript	1769069	1771196	.	-	.	gene_id "PBfusion.83"; transcript_id "PBfusion.83.1";
GWHAAEP00001135	PacBio	exon	1769069	1769378	.	-	.	gene_id "PBfusion.83"; transcript_id "PBfusion.83.1";
GWHAAEP00001135	PacBio	exon	1770100	1771196	.	-	.	gene_id "PBfusion.83"; transcript_id "PBfusion.83.1";
GWHAAEP00012633	PacBio	transcript	990	3117	.	-	.	gene_id "PBfusion.83"; transcript_id "PBfusion.83.2";
GWHAAEP00012633	PacBio	exon	990	1299	.	-	.	gene_id "PBfusion.83"; transcript_id "PBfusion.83.2";
GWHAAEP00012633	PacBio	exon	2021	3117	.	-	.	gene_id "PBfusion.83"; transcript_id "PBfusion.83.2";
GWHAAEP00002461	PacBio	transcript	811450	830212	.	+	.	gene_id "PBfusion.4"; transcript_id "PBfusion.4.1";
GWHAAEP00002461	PacBio	exon	811450	811730	.	+	.	gene_id "PBfusion.4"; transcript_id "PBfusion.4.1";
GWHAAEP00002461	PacBio	exon	811818	811911	.	+	.	gene_id "PBfusion.4"; transcript_id "PBfusion.4.1";
GWHAAEP00002461	PacBio	exon	812210	812411	.	+	.	gene_id "PBfusion.4"; transcript_id "PBfusion.4.1";
GWHAAEP00002461	PacBio	exon	812666	812807	.	+	.	gene_id "PBfusion.4"; transcript_id "PBfusion.4.1";
GWHAAEP00002461	PacBio	exon	812933	813033	.	+	.	gene_id "PBfusion.4"; transcript_id "PBfusion.4.1";
GWHAAEP00002461	PacBio	exon	813488	813551	.	+	.	gene_id "PBfusion.4"; transcript_id "PBfusion.4.1";
GWHAAEP00002461	PacBio	exon	813774	813887	.	+	.	gene_id "PBfusion.4"; transcript_id "PBfusion.4.1";
GWHAAEP00002461	PacBio	exon	815423	815643	.	+	.	gene_id "PBfusion.4"; transcript_id "PBfusion.4.1";
GWHAAEP00002461	PacBio	exon	816528	816582	.	+	.	gene_id "PBfusion.4"; transcript_id "PBfusion.4.1";
GWHAAEP00002461	PacBio	exon	816683	816766	.	+	.	gene_id "PBfusion.4"; transcript_id "PBfusion.4.1";
GWHAAEP00002461	PacBio	exon	816901	817096	.	+	.	gene_id "PBfusion.4"; transcript_id "PBfusion.4.1";
GWHAAEP00002461	PacBio	exon	817211	817337	.	+	.	gene_id "PBfusion.4"; transcript_id "PBfusion.4.1";
GWHAAEP00002461	PacBio	exon	817449	817500	.	+	.	gene_id "PBfusion.4"; transcript_id "PBfusion.4.1";
GWHAAEP00002461	PacBio	exon	817589	817633	.	+	.	gene_id "PBfusion.4"; transcript_id "PBfusion.4.1";
GWHAAEP00002461	PacBio	exon	818413	818488	.	+	.	gene_id "PBfusion.4"; transcript_id "PBfusion.4.1";
GWHAAEP00002461	PacBio	exon	818628	818832	.	+	.	gene_id "PBfusion.4"; transcript_id "PBfusion.4.1";
GWHAAEP00002461	PacBio	exon	819122	819279	.	+	.	gene_id "PBfusion.4"; transcript_id "PBfusion.4.1";
GWHAAEP00002461	PacBio	exon	819556	819603	.	+	.	gene_id "PBfusion.4"; transcript_id "PBfusion.4.1";
GWHAAEP00002461	PacBio	exon	820135	820192	.	+	.	gene_id "PBfusion.4"; transcript_id "PBfusion.4.1";
GWHAAEP00002461	PacBio	exon	820285	820368	.	+	.	gene_id "PBfusion.4"; transcript_id "PBfusion.4.1";
GWHAAEP00002461	PacBio	exon	821874	822129	.	+	.	gene_id "PBfusion.4"; transcript_id "PBfusion.4.1";
GWHAAEP00002461	PacBio	exon	822238	822434	.	+	.	gene_id "PBfusion.4"; transcript_id "PBfusion.4.1";
GWHAAEP00002461	PacBio	exon	822794	822858	.	+	.	gene_id "PBfusion.4"; transcript_id "PBfusion.4.1";
GWHAAEP00002461	PacBio	exon	822965	823088	.	+	.	gene_id "PBfusion.4"; transcript_id "PBfusion.4.1";
GWHAAEP00002461	PacBio	exon	825570	825751	.	+	.	gene_id "PBfusion.4"; transcript_id "PBfusion.4.1";
GWHAAEP00002461	PacBio	exon	825852	825923	.	+	.	gene_id "PBfusion.4"; transcript_id "PBfusion.4.1";
GWHAAEP00002461	PacBio	exon	826009	826169	.	+	.	gene_id "PBfusion.4"; transcript_id "PBfusion.4.1";
GWHAAEP00002461	PacBio	exon	826365	826406	.	+	.	gene_id "PBfusion.4"; transcript_id "PBfusion.4.1";
GWHAAEP00002461	PacBio	exon	827379	827587	.	+	.	gene_id "PBfusion.4"; transcript_id "PBfusion.4.1";
GWHAAEP00002461	PacBio	exon	829763	830212	.	+	.	gene_id "PBfusion.4"; transcript_id "PBfusion.4.1";
GWHAAEP00006596	PacBio	transcript	81476	100238	.	+	.	gene_id "PBfusion.4"; transcript_id "PBfusion.4.2";
GWHAAEP00006596	PacBio	exon	81476	81756	.	+	.	gene_id "PBfusion.4"; transcript_id "PBfusion.4.2";
GWHAAEP00006596	PacBio	exon	81844	81937	.	+	.	gene_id "PBfusion.4"; transcript_id "PBfusion.4.2";
GWHAAEP00006596	PacBio	exon	82236	82437	.	+	.	gene_id "PBfusion.4"; transcript_id "PBfusion.4.2";
GWHAAEP00006596	PacBio	exon	82692	82833	.	+	.	gene_id "PBfusion.4"; transcript_id "PBfusion.4.2";
GWHAAEP00006596	PacBio	exon	82959	83059	.	+	.	gene_id "PBfusion.4"; transcript_id "PBfusion.4.2";
GWHAAEP00006596	PacBio	exon	83514	83577	.	+	.	gene_id "PBfusion.4"; transcript_id "PBfusion.4.2";
GWHAAEP00006596	PacBio	exon	83800	83913	.	+	.	gene_id "PBfusion.4"; transcript_id "PBfusion.4.2";
GWHAAEP00006596	PacBio	exon	85449	85669	.	+	.	gene_id "PBfusion.4"; transcript_id "PBfusion.4.2";
GWHAAEP00006596	PacBio	exon	86554	86608	.	+	.	gene_id "PBfusion.4"; transcript_id "PBfusion.4.2";
GWHAAEP00006596	PacBio	exon	86709	86792	.	+	.	gene_id "PBfusion.4"; transcript_id "PBfusion.4.2";
GWHAAEP00006596	PacBio	exon	86927	87122	.	+	.	gene_id "PBfusion.4"; transcript_id "PBfusion.4.2";
GWHAAEP00006596	PacBio	exon	87237	87363	.	+	.	gene_id "PBfusion.4"; transcript_id "PBfusion.4.2";
GWHAAEP00006596	PacBio	exon	87475	87526	.	+	.	gene_id "PBfusion.4"; transcript_id "PBfusion.4.2";
GWHAAEP00006596	PacBio	exon	87615	87659	.	+	.	gene_id "PBfusion.4"; transcript_id "PBfusion.4.2";
GWHAAEP00006596	PacBio	exon	88439	88514	.	+	.	gene_id "PBfusion.4"; transcript_id "PBfusion.4.2";
GWHAAEP00006596	PacBio	exon	88654	88858	.	+	.	gene_id "PBfusion.4"; transcript_id "PBfusion.4.2";
GWHAAEP00006596	PacBio	exon	89148	89305	.	+	.	gene_id "PBfusion.4"; transcript_id "PBfusion.4.2";
GWHAAEP00006596	PacBio	exon	89582	89629	.	+	.	gene_id "PBfusion.4"; transcript_id "PBfusion.4.2";
GWHAAEP00006596	PacBio	exon	90161	90218	.	+	.	gene_id "PBfusion.4"; transcript_id "PBfusion.4.2";
GWHAAEP00006596	PacBio	exon	90311	90394	.	+	.	gene_id "PBfusion.4"; transcript_id "PBfusion.4.2";
GWHAAEP00006596	PacBio	exon	91900	92155	.	+	.	gene_id "PBfusion.4"; transcript_id "PBfusion.4.2";
GWHAAEP00006596	PacBio	exon	92264	92460	.	+	.	gene_id "PBfusion.4"; transcript_id "PBfusion.4.2";
GWHAAEP00006596	PacBio	exon	92820	92884	.	+	.	gene_id "PBfusion.4"; transcript_id "PBfusion.4.2";
GWHAAEP00006596	PacBio	exon	92991	93114	.	+	.	gene_id "PBfusion.4"; transcript_id "PBfusion.4.2";
GWHAAEP00006596	PacBio	exon	95596	95777	.	+	.	gene_id "PBfusion.4"; transcript_id "PBfusion.4.2";
GWHAAEP00006596	PacBio	exon	95878	95949	.	+	.	gene_id "PBfusion.4"; transcript_id "PBfusion.4.2";
GWHAAEP00006596	PacBio	exon	96035	96195	.	+	.	gene_id "PBfusion.4"; transcript_id "PBfusion.4.2";
GWHAAEP00006596	PacBio	exon	96391	96432	.	+	.	gene_id "PBfusion.4"; transcript_id "PBfusion.4.2";
GWHAAEP00006596	PacBio	exon	97405	97613	.	+	.	gene_id "PBfusion.4"; transcript_id "PBfusion.4.2";
GWHAAEP00006596	PacBio	exon	99789	100238	.	+	.	gene_id "PBfusion.4"; transcript_id "PBfusion.4.2";
GWHAAEP00001698	PacBio	transcript	467923	471371	.	-	.	gene_id "PBfusion.81"; transcript_id "PBfusion.81.1";
GWHAAEP00001698	PacBio	exon	467923	468300	.	-	.	gene_id "PBfusion.81"; transcript_id "PBfusion.81.1";
GWHAAEP00001698	PacBio	exon	469282	469630	.	-	.	gene_id "PBfusion.81"; transcript_id "PBfusion.81.1";
GWHAAEP00001698	PacBio	exon	469703	469775	.	-	.	gene_id "PBfusion.81"; transcript_id "PBfusion.81.1";
GWHAAEP00001698	PacBio	exon	470061	471371	.	-	.	gene_id "PBfusion.81"; transcript_id "PBfusion.81.1";
GWHAAEP00001998	PacBio	transcript	490	3938	.	-	.	gene_id "PBfusion.81"; transcript_id "PBfusion.81.2";
GWHAAEP00001998	PacBio	exon	490	867	.	-	.	gene_id "PBfusion.81"; transcript_id "PBfusion.81.2";
GWHAAEP00001998	PacBio	exon	1849	2197	.	-	.	gene_id "PBfusion.81"; transcript_id "PBfusion.81.2";
GWHAAEP00001998	PacBio	exon	2270	2342	.	-	.	gene_id "PBfusion.81"; transcript_id "PBfusion.81.2";
GWHAAEP00001998	PacBio	exon	2628	3938	.	-	.	gene_id "PBfusion.81"; transcript_id "PBfusion.81.2";
GWHAAEP00002461	PacBio	transcript	881561	889309	.	+	.	gene_id "PBfusion.80"; transcript_id "PBfusion.80.1";
GWHAAEP00002461	PacBio	exon	881561	881627	.	+	.	gene_id "PBfusion.80"; transcript_id "PBfusion.80.1";
GWHAAEP00002461	PacBio	exon	881739	881812	.	+	.	gene_id "PBfusion.80"; transcript_id "PBfusion.80.1";
GWHAAEP00002461	PacBio	exon	881919	881999	.	+	.	gene_id "PBfusion.80"; transcript_id "PBfusion.80.1";
GWHAAEP00002461	PacBio	exon	882562	882622	.	+	.	gene_id "PBfusion.80"; transcript_id "PBfusion.80.1";
GWHAAEP00002461	PacBio	exon	882740	882789	.	+	.	gene_id "PBfusion.80"; transcript_id "PBfusion.80.1";
GWHAAEP00002461	PacBio	exon	883504	883558	.	+	.	gene_id "PBfusion.80"; transcript_id "PBfusion.80.1";
GWHAAEP00002461	PacBio	exon	884581	884658	.	+	.	gene_id "PBfusion.80"; transcript_id "PBfusion.80.1";
GWHAAEP00002461	PacBio	exon	884787	884840	.	+	.	gene_id "PBfusion.80"; transcript_id "PBfusion.80.1";
GWHAAEP00002461	PacBio	exon	885050	887064	.	+	.	gene_id "PBfusion.80"; transcript_id "PBfusion.80.1";
GWHAAEP00002461	PacBio	exon	887163	887225	.	+	.	gene_id "PBfusion.80"; transcript_id "PBfusion.80.1";
GWHAAEP00002461	PacBio	exon	887694	887756	.	+	.	gene_id "PBfusion.80"; transcript_id "PBfusion.80.1";
GWHAAEP00002461	PacBio	exon	887878	887942	.	+	.	gene_id "PBfusion.80"; transcript_id "PBfusion.80.1";
GWHAAEP00002461	PacBio	exon	888661	888729	.	+	.	gene_id "PBfusion.80"; transcript_id "PBfusion.80.1";
GWHAAEP00002461	PacBio	exon	888918	889309	.	+	.	gene_id "PBfusion.80"; transcript_id "PBfusion.80.1";
GWHAAEP00006596	PacBio	transcript	151579	159327	.	+	.	gene_id "PBfusion.80"; transcript_id "PBfusion.80.2";
GWHAAEP00006596	PacBio	exon	151579	151645	.	+	.	gene_id "PBfusion.80"; transcript_id "PBfusion.80.2";
GWHAAEP00006596	PacBio	exon	151757	151830	.	+	.	gene_id "PBfusion.80"; transcript_id "PBfusion.80.2";
GWHAAEP00006596	PacBio	exon	151937	152017	.	+	.	gene_id "PBfusion.80"; transcript_id "PBfusion.80.2";
GWHAAEP00006596	PacBio	exon	152580	152640	.	+	.	gene_id "PBfusion.80"; transcript_id "PBfusion.80.2";
GWHAAEP00006596	PacBio	exon	152758	152807	.	+	.	gene_id "PBfusion.80"; transcript_id "PBfusion.80.2";
GWHAAEP00006596	PacBio	exon	153522	153576	.	+	.	gene_id "PBfusion.80"; transcript_id "PBfusion.80.2";
GWHAAEP00006596	PacBio	exon	154599	154676	.	+	.	gene_id "PBfusion.80"; transcript_id "PBfusion.80.2";
GWHAAEP00006596	PacBio	exon	154805	154858	.	+	.	gene_id "PBfusion.80"; transcript_id "PBfusion.80.2";
GWHAAEP00006596	PacBio	exon	155068	157082	.	+	.	gene_id "PBfusion.80"; transcript_id "PBfusion.80.2";
GWHAAEP00006596	PacBio	exon	157181	157243	.	+	.	gene_id "PBfusion.80"; transcript_id "PBfusion.80.2";
GWHAAEP00006596	PacBio	exon	157712	157774	.	+	.	gene_id "PBfusion.80"; transcript_id "PBfusion.80.2";
GWHAAEP00006596	PacBio	exon	157896	157960	.	+	.	gene_id "PBfusion.80"; transcript_id "PBfusion.80.2";
GWHAAEP00006596	PacBio	exon	158679	158747	.	+	.	gene_id "PBfusion.80"; transcript_id "PBfusion.80.2";
GWHAAEP00006596	PacBio	exon	158936	159327	.	+	.	gene_id "PBfusion.80"; transcript_id "PBfusion.80.2";
GWHAAEP00000662	PacBio	transcript	870537	871673	.	+	.	gene_id "PBfusion.29"; transcript_id "PBfusion.29.1";
GWHAAEP00000662	PacBio	exon	870537	871673	.	+	.	gene_id "PBfusion.29"; transcript_id "PBfusion.29.1";
GWHAAEP00003948	PacBio	transcript	971	2107	.	-	.	gene_id "PBfusion.29"; transcript_id "PBfusion.29.2";
GWHAAEP00003948	PacBio	exon	971	2107	.	-	.	gene_id "PBfusion.29"; transcript_id "PBfusion.29.2";
GWHAAEP00000633	PacBio	transcript	90994	101881	.	-	.	gene_id "PBfusion.28"; transcript_id "PBfusion.28.1";
GWHAAEP00000633	PacBio	exon	90994	91356	.	-	.	gene_id "PBfusion.28"; transcript_id "PBfusion.28.1";
GWHAAEP00000633	PacBio	exon	91815	91940	.	-	.	gene_id "PBfusion.28"; transcript_id "PBfusion.28.1";
GWHAAEP00000633	PacBio	exon	92102	92173	.	-	.	gene_id "PBfusion.28"; transcript_id "PBfusion.28.1";
GWHAAEP00000633	PacBio	exon	92587	92669	.	-	.	gene_id "PBfusion.28"; transcript_id "PBfusion.28.1";
GWHAAEP00000633	PacBio	exon	93041	93132	.	-	.	gene_id "PBfusion.28"; transcript_id "PBfusion.28.1";
GWHAAEP00000633	PacBio	exon	94456	94532	.	-	.	gene_id "PBfusion.28"; transcript_id "PBfusion.28.1";
GWHAAEP00000633	PacBio	exon	94610	94870	.	-	.	gene_id "PBfusion.28"; transcript_id "PBfusion.28.1";
GWHAAEP00000633	PacBio	exon	96013	96074	.	-	.	gene_id "PBfusion.28"; transcript_id "PBfusion.28.1";
GWHAAEP00000633	PacBio	exon	96408	96534	.	-	.	gene_id "PBfusion.28"; transcript_id "PBfusion.28.1";
GWHAAEP00000633	PacBio	exon	98005	98267	.	-	.	gene_id "PBfusion.28"; transcript_id "PBfusion.28.1";
GWHAAEP00000633	PacBio	exon	99226	99415	.	-	.	gene_id "PBfusion.28"; transcript_id "PBfusion.28.1";
GWHAAEP00000633	PacBio	exon	100179	100286	.	-	.	gene_id "PBfusion.28"; transcript_id "PBfusion.28.1";
GWHAAEP00000633	PacBio	exon	100479	100793	.	-	.	gene_id "PBfusion.28"; transcript_id "PBfusion.28.1";
GWHAAEP00000633	PacBio	exon	101281	101511	.	-	.	gene_id "PBfusion.28"; transcript_id "PBfusion.28.1";
GWHAAEP00000633	PacBio	exon	101600	101881	.	-	.	gene_id "PBfusion.28"; transcript_id "PBfusion.28.1";
GWHAAEP00000862	PacBio	transcript	144400	155287	.	-	.	gene_id "PBfusion.28"; transcript_id "PBfusion.28.2";
GWHAAEP00000862	PacBio	exon	144400	144762	.	-	.	gene_id "PBfusion.28"; transcript_id "PBfusion.28.2";
GWHAAEP00000862	PacBio	exon	145221	145346	.	-	.	gene_id "PBfusion.28"; transcript_id "PBfusion.28.2";
GWHAAEP00000862	PacBio	exon	145508	145579	.	-	.	gene_id "PBfusion.28"; transcript_id "PBfusion.28.2";
GWHAAEP00000862	PacBio	exon	145993	146075	.	-	.	gene_id "PBfusion.28"; transcript_id "PBfusion.28.2";
GWHAAEP00000862	PacBio	exon	146447	146538	.	-	.	gene_id "PBfusion.28"; transcript_id "PBfusion.28.2";
GWHAAEP00000862	PacBio	exon	147862	147938	.	-	.	gene_id "PBfusion.28"; transcript_id "PBfusion.28.2";
GWHAAEP00000862	PacBio	exon	148016	148276	.	-	.	gene_id "PBfusion.28"; transcript_id "PBfusion.28.2";
GWHAAEP00000862	PacBio	exon	149419	149480	.	-	.	gene_id "PBfusion.28"; transcript_id "PBfusion.28.2";
GWHAAEP00000862	PacBio	exon	149814	149940	.	-	.	gene_id "PBfusion.28"; transcript_id "PBfusion.28.2";
GWHAAEP00000862	PacBio	exon	151411	151673	.	-	.	gene_id "PBfusion.28"; transcript_id "PBfusion.28.2";
GWHAAEP00000862	PacBio	exon	152632	152821	.	-	.	gene_id "PBfusion.28"; transcript_id "PBfusion.28.2";
GWHAAEP00000862	PacBio	exon	153585	153692	.	-	.	gene_id "PBfusion.28"; transcript_id "PBfusion.28.2";
GWHAAEP00000862	PacBio	exon	153885	154199	.	-	.	gene_id "PBfusion.28"; transcript_id "PBfusion.28.2";
GWHAAEP00000862	PacBio	exon	154687	154917	.	-	.	gene_id "PBfusion.28"; transcript_id "PBfusion.28.2";
GWHAAEP00000862	PacBio	exon	155006	155287	.	-	.	gene_id "PBfusion.28"; transcript_id "PBfusion.28.2";
GWHAAEP00002461	PacBio	transcript	850414	860226	.	+	.	gene_id "PBfusion.5"; transcript_id "PBfusion.5.1";
GWHAAEP00002461	PacBio	exon	850414	850727	.	+	.	gene_id "PBfusion.5"; transcript_id "PBfusion.5.1";
GWHAAEP00002461	PacBio	exon	850959	851069	.	+	.	gene_id "PBfusion.5"; transcript_id "PBfusion.5.1";
GWHAAEP00002461	PacBio	exon	851153	851331	.	+	.	gene_id "PBfusion.5"; transcript_id "PBfusion.5.1";
GWHAAEP00002461	PacBio	exon	851813	851962	.	+	.	gene_id "PBfusion.5"; transcript_id "PBfusion.5.1";
GWHAAEP00002461	PacBio	exon	852832	852920	.	+	.	gene_id "PBfusion.5"; transcript_id "PBfusion.5.1";
GWHAAEP00002461	PacBio	exon	853075	853184	.	+	.	gene_id "PBfusion.5"; transcript_id "PBfusion.5.1";
GWHAAEP00002461	PacBio	exon	853336	853430	.	+	.	gene_id "PBfusion.5"; transcript_id "PBfusion.5.1";
GWHAAEP00002461	PacBio	exon	854314	854369	.	+	.	gene_id "PBfusion.5"; transcript_id "PBfusion.5.1";
GWHAAEP00002461	PacBio	exon	854581	854746	.	+	.	gene_id "PBfusion.5"; transcript_id "PBfusion.5.1";
GWHAAEP00002461	PacBio	exon	855877	855969	.	+	.	gene_id "PBfusion.5"; transcript_id "PBfusion.5.1";
GWHAAEP00002461	PacBio	exon	856352	856480	.	+	.	gene_id "PBfusion.5"; transcript_id "PBfusion.5.1";
GWHAAEP00002461	PacBio	exon	856756	856875	.	+	.	gene_id "PBfusion.5"; transcript_id "PBfusion.5.1";
GWHAAEP00002461	PacBio	exon	857225	857305	.	+	.	gene_id "PBfusion.5"; transcript_id "PBfusion.5.1";
GWHAAEP00002461	PacBio	exon	857884	857991	.	+	.	gene_id "PBfusion.5"; transcript_id "PBfusion.5.1";
GWHAAEP00002461	PacBio	exon	858132	858275	.	+	.	gene_id "PBfusion.5"; transcript_id "PBfusion.5.1";
GWHAAEP00002461	PacBio	exon	858363	858464	.	+	.	gene_id "PBfusion.5"; transcript_id "PBfusion.5.1";
GWHAAEP00002461	PacBio	exon	858883	858962	.	+	.	gene_id "PBfusion.5"; transcript_id "PBfusion.5.1";
GWHAAEP00002461	PacBio	exon	859624	859716	.	+	.	gene_id "PBfusion.5"; transcript_id "PBfusion.5.1";
GWHAAEP00002461	PacBio	exon	859800	860226	.	+	.	gene_id "PBfusion.5"; transcript_id "PBfusion.5.1";
GWHAAEP00006596	PacBio	transcript	120440	130252	.	+	.	gene_id "PBfusion.5"; transcript_id "PBfusion.5.2";
GWHAAEP00006596	PacBio	exon	120440	120753	.	+	.	gene_id "PBfusion.5"; transcript_id "PBfusion.5.2";
GWHAAEP00006596	PacBio	exon	120985	121095	.	+	.	gene_id "PBfusion.5"; transcript_id "PBfusion.5.2";
GWHAAEP00006596	PacBio	exon	121179	121357	.	+	.	gene_id "PBfusion.5"; transcript_id "PBfusion.5.2";
GWHAAEP00006596	PacBio	exon	121839	121988	.	+	.	gene_id "PBfusion.5"; transcript_id "PBfusion.5.2";
GWHAAEP00006596	PacBio	exon	122858	122946	.	+	.	gene_id "PBfusion.5"; transcript_id "PBfusion.5.2";
GWHAAEP00006596	PacBio	exon	123101	123210	.	+	.	gene_id "PBfusion.5"; transcript_id "PBfusion.5.2";
GWHAAEP00006596	PacBio	exon	123362	123456	.	+	.	gene_id "PBfusion.5"; transcript_id "PBfusion.5.2";
GWHAAEP00006596	PacBio	exon	124340	124395	.	+	.	gene_id "PBfusion.5"; transcript_id "PBfusion.5.2";
GWHAAEP00006596	PacBio	exon	124607	124772	.	+	.	gene_id "PBfusion.5"; transcript_id "PBfusion.5.2";
GWHAAEP00006596	PacBio	exon	125903	125995	.	+	.	gene_id "PBfusion.5"; transcript_id "PBfusion.5.2";
GWHAAEP00006596	PacBio	exon	126378	126506	.	+	.	gene_id "PBfusion.5"; transcript_id "PBfusion.5.2";
GWHAAEP00006596	PacBio	exon	126782	126901	.	+	.	gene_id "PBfusion.5"; transcript_id "PBfusion.5.2";
GWHAAEP00006596	PacBio	exon	127251	127331	.	+	.	gene_id "PBfusion.5"; transcript_id "PBfusion.5.2";
GWHAAEP00006596	PacBio	exon	127910	128017	.	+	.	gene_id "PBfusion.5"; transcript_id "PBfusion.5.2";
GWHAAEP00006596	PacBio	exon	128158	128301	.	+	.	gene_id "PBfusion.5"; transcript_id "PBfusion.5.2";
GWHAAEP00006596	PacBio	exon	128389	128490	.	+	.	gene_id "PBfusion.5"; transcript_id "PBfusion.5.2";
GWHAAEP00006596	PacBio	exon	128909	128988	.	+	.	gene_id "PBfusion.5"; transcript_id "PBfusion.5.2";
GWHAAEP00006596	PacBio	exon	129650	129742	.	+	.	gene_id "PBfusion.5"; transcript_id "PBfusion.5.2";
GWHAAEP00006596	PacBio	exon	129826	130252	.	+	.	gene_id "PBfusion.5"; transcript_id "PBfusion.5.2";
GWHAAEP00000633	PacBio	transcript	80013	85740	.	+	.	gene_id "PBfusion.122"; transcript_id "PBfusion.122.1";
GWHAAEP00000633	PacBio	exon	80013	81306	.	+	.	gene_id "PBfusion.122"; transcript_id "PBfusion.122.1";
GWHAAEP00000633	PacBio	exon	81408	81725	.	+	.	gene_id "PBfusion.122"; transcript_id "PBfusion.122.1";
GWHAAEP00000633	PacBio	exon	82244	82471	.	+	.	gene_id "PBfusion.122"; transcript_id "PBfusion.122.1";
GWHAAEP00000633	PacBio	exon	83576	83676	.	+	.	gene_id "PBfusion.122"; transcript_id "PBfusion.122.1";
GWHAAEP00000633	PacBio	exon	84321	84438	.	+	.	gene_id "PBfusion.122"; transcript_id "PBfusion.122.1";
GWHAAEP00000633	PacBio	exon	85121	85740	.	+	.	gene_id "PBfusion.122"; transcript_id "PBfusion.122.1";
GWHAAEP00000862	PacBio	transcript	133419	139146	.	+	.	gene_id "PBfusion.122"; transcript_id "PBfusion.122.2";
GWHAAEP00000862	PacBio	exon	133419	134712	.	+	.	gene_id "PBfusion.122"; transcript_id "PBfusion.122.2";
GWHAAEP00000862	PacBio	exon	134814	135131	.	+	.	gene_id "PBfusion.122"; transcript_id "PBfusion.122.2";
GWHAAEP00000862	PacBio	exon	135650	135877	.	+	.	gene_id "PBfusion.122"; transcript_id "PBfusion.122.2";
GWHAAEP00000862	PacBio	exon	136982	137082	.	+	.	gene_id "PBfusion.122"; transcript_id "PBfusion.122.2";
GWHAAEP00000862	PacBio	exon	137727	137844	.	+	.	gene_id "PBfusion.122"; transcript_id "PBfusion.122.2";
GWHAAEP00000862	PacBio	exon	138527	139146	.	+	.	gene_id "PBfusion.122"; transcript_id "PBfusion.122.2";
GWHAAEP00002537	PacBio	transcript	259140	260794	.	+	.	gene_id "PBfusion.21"; transcript_id "PBfusion.21.1";
GWHAAEP00002537	PacBio	exon	259140	259486	.	+	.	gene_id "PBfusion.21"; transcript_id "PBfusion.21.1";
GWHAAEP00002537	PacBio	exon	259618	259810	.	+	.	gene_id "PBfusion.21"; transcript_id "PBfusion.21.1";
GWHAAEP00002537	PacBio	exon	259905	260164	.	+	.	gene_id "PBfusion.21"; transcript_id "PBfusion.21.1";
GWHAAEP00002537	PacBio	exon	260281	260338	.	+	.	gene_id "PBfusion.21"; transcript_id "PBfusion.21.1";
GWHAAEP00002537	PacBio	exon	260478	260794	.	+	.	gene_id "PBfusion.21"; transcript_id "PBfusion.21.1";
GWHAAEP00010348	PacBio	transcript	2556	4210	.	-	.	gene_id "PBfusion.21"; transcript_id "PBfusion.21.2";
GWHAAEP00010348	PacBio	exon	2556	2872	.	-	.	gene_id "PBfusion.21"; transcript_id "PBfusion.21.2";
GWHAAEP00010348	PacBio	exon	3012	3069	.	-	.	gene_id "PBfusion.21"; transcript_id "PBfusion.21.2";
GWHAAEP00010348	PacBio	exon	3186	3445	.	-	.	gene_id "PBfusion.21"; transcript_id "PBfusion.21.2";
GWHAAEP00010348	PacBio	exon	3540	3732	.	-	.	gene_id "PBfusion.21"; transcript_id "PBfusion.21.2";
GWHAAEP00010348	PacBio	exon	3864	4210	.	-	.	gene_id "PBfusion.21"; transcript_id "PBfusion.21.2";
GWHAAEP00000840	PacBio	transcript	89410	92507	.	+	.	gene_id "PBfusion.20"; transcript_id "PBfusion.20.1";
GWHAAEP00000840	PacBio	exon	89410	89474	.	+	.	gene_id "PBfusion.20"; transcript_id "PBfusion.20.1";
GWHAAEP00000840	PacBio	exon	91370	92507	.	+	.	gene_id "PBfusion.20"; transcript_id "PBfusion.20.1";
GWHAAEP00002636	PacBio	transcript	2137	5234	.	+	.	gene_id "PBfusion.20"; transcript_id "PBfusion.20.2";
GWHAAEP00002636	PacBio	exon	2137	2201	.	+	.	gene_id "PBfusion.20"; transcript_id "PBfusion.20.2";
GWHAAEP00002636	PacBio	exon	4097	5234	.	+	.	gene_id "PBfusion.20"; transcript_id "PBfusion.20.2";
GWHAAEP00000633	PacBio	transcript	50973	55476	.	+	.	gene_id "PBfusion.23"; transcript_id "PBfusion.23.1";
GWHAAEP00000633	PacBio	exon	50973	53301	.	+	.	gene_id "PBfusion.23"; transcript_id "PBfusion.23.1";
GWHAAEP00000633	PacBio	exon	54219	54719	.	+	.	gene_id "PBfusion.23"; transcript_id "PBfusion.23.1";
GWHAAEP00000633	PacBio	exon	54816	54984	.	+	.	gene_id "PBfusion.23"; transcript_id "PBfusion.23.1";
GWHAAEP00000633	PacBio	exon	55127	55476	.	+	.	gene_id "PBfusion.23"; transcript_id "PBfusion.23.1";
GWHAAEP00000862	PacBio	transcript	104379	108882	.	+	.	gene_id "PBfusion.23"; transcript_id "PBfusion.23.2";
GWHAAEP00000862	PacBio	exon	104379	106707	.	+	.	gene_id "PBfusion.23"; transcript_id "PBfusion.23.2";
GWHAAEP00000862	PacBio	exon	107625	108125	.	+	.	gene_id "PBfusion.23"; transcript_id "PBfusion.23.2";
GWHAAEP00000862	PacBio	exon	108222	108390	.	+	.	gene_id "PBfusion.23"; transcript_id "PBfusion.23.2";
GWHAAEP00000862	PacBio	exon	108533	108882	.	+	.	gene_id "PBfusion.23"; transcript_id "PBfusion.23.2";
GWHAAEP00002113	PacBio	transcript	23085	26829	.	-	.	gene_id "PBfusion.22"; transcript_id "PBfusion.22.1";
GWHAAEP00002113	PacBio	exon	23085	24923	.	-	.	gene_id "PBfusion.22"; transcript_id "PBfusion.22.1";
GWHAAEP00002113	PacBio	exon	25291	25608	.	-	.	gene_id "PBfusion.22"; transcript_id "PBfusion.22.1";
GWHAAEP00002113	PacBio	exon	26308	26829	.	-	.	gene_id "PBfusion.22"; transcript_id "PBfusion.22.1";
GWHAAEP00007138	PacBio	transcript	370009	373753	.	-	.	gene_id "PBfusion.22"; transcript_id "PBfusion.22.2";
GWHAAEP00007138	PacBio	exon	370009	371847	.	-	.	gene_id "PBfusion.22"; transcript_id "PBfusion.22.2";
GWHAAEP00007138	PacBio	exon	372215	372532	.	-	.	gene_id "PBfusion.22"; transcript_id "PBfusion.22.2";
GWHAAEP00007138	PacBio	exon	373232	373753	.	-	.	gene_id "PBfusion.22"; transcript_id "PBfusion.22.2";
GWHAAEP00000633	PacBio	transcript	50973	55453	.	+	.	gene_id "PBfusion.25"; transcript_id "PBfusion.25.1";
GWHAAEP00000633	PacBio	exon	50973	53301	.	+	.	gene_id "PBfusion.25"; transcript_id "PBfusion.25.1";
GWHAAEP00000633	PacBio	exon	54144	54719	.	+	.	gene_id "PBfusion.25"; transcript_id "PBfusion.25.1";
GWHAAEP00000633	PacBio	exon	54816	54984	.	+	.	gene_id "PBfusion.25"; transcript_id "PBfusion.25.1";
GWHAAEP00000633	PacBio	exon	55127	55453	.	+	.	gene_id "PBfusion.25"; transcript_id "PBfusion.25.1";
GWHAAEP00000862	PacBio	transcript	104379	108859	.	+	.	gene_id "PBfusion.25"; transcript_id "PBfusion.25.2";
GWHAAEP00000862	PacBio	exon	104379	106707	.	+	.	gene_id "PBfusion.25"; transcript_id "PBfusion.25.2";
GWHAAEP00000862	PacBio	exon	107550	108125	.	+	.	gene_id "PBfusion.25"; transcript_id "PBfusion.25.2";
GWHAAEP00000862	PacBio	exon	108222	108390	.	+	.	gene_id "PBfusion.25"; transcript_id "PBfusion.25.2";
GWHAAEP00000862	PacBio	exon	108533	108859	.	+	.	gene_id "PBfusion.25"; transcript_id "PBfusion.25.2";
GWHAAEP00001464	PacBio	transcript	475144	479068	.	-	.	gene_id "PBfusion.24"; transcript_id "PBfusion.24.1";
GWHAAEP00001464	PacBio	exon	475144	478222	.	-	.	gene_id "PBfusion.24"; transcript_id "PBfusion.24.1";
GWHAAEP00001464	PacBio	exon	478913	479068	.	-	.	gene_id "PBfusion.24"; transcript_id "PBfusion.24.1";
GWHAAEP00009916	PacBio	transcript	5247	9171	.	-	.	gene_id "PBfusion.24"; transcript_id "PBfusion.24.2";
GWHAAEP00009916	PacBio	exon	5247	8325	.	-	.	gene_id "PBfusion.24"; transcript_id "PBfusion.24.2";
GWHAAEP00009916	PacBio	exon	9016	9171	.	-	.	gene_id "PBfusion.24"; transcript_id "PBfusion.24.2";
GWHAAEP00002461	PacBio	transcript	952933	958943	.	-	.	gene_id "PBfusion.27"; transcript_id "PBfusion.27.1";
GWHAAEP00002461	PacBio	exon	952933	953507	.	-	.	gene_id "PBfusion.27"; transcript_id "PBfusion.27.1";
GWHAAEP00002461	PacBio	exon	954860	955073	.	-	.	gene_id "PBfusion.27"; transcript_id "PBfusion.27.1";
GWHAAEP00002461	PacBio	exon	955175	958167	.	-	.	gene_id "PBfusion.27"; transcript_id "PBfusion.27.1";
GWHAAEP00002461	PacBio	exon	958309	958473	.	-	.	gene_id "PBfusion.27"; transcript_id "PBfusion.27.1";
GWHAAEP00002461	PacBio	exon	958673	958943	.	-	.	gene_id "PBfusion.27"; transcript_id "PBfusion.27.1";
GWHAAEP00006596	PacBio	transcript	222951	228961	.	-	.	gene_id "PBfusion.27"; transcript_id "PBfusion.27.2";
GWHAAEP00006596	PacBio	exon	222951	223525	.	-	.	gene_id "PBfusion.27"; transcript_id "PBfusion.27.2";
GWHAAEP00006596	PacBio	exon	224878	225091	.	-	.	gene_id "PBfusion.27"; transcript_id "PBfusion.27.2";
GWHAAEP00006596	PacBio	exon	225193	228185	.	-	.	gene_id "PBfusion.27"; transcript_id "PBfusion.27.2";
GWHAAEP00006596	PacBio	exon	228327	228491	.	-	.	gene_id "PBfusion.27"; transcript_id "PBfusion.27.2";
GWHAAEP00006596	PacBio	exon	228691	228961	.	-	.	gene_id "PBfusion.27"; transcript_id "PBfusion.27.2";
GWHAAEP00000531	PacBio	transcript	26156	27975	.	+	.	gene_id "PBfusion.26"; transcript_id "PBfusion.26.1";
GWHAAEP00000531	PacBio	exon	26156	26449	.	+	.	gene_id "PBfusion.26"; transcript_id "PBfusion.26.1";
GWHAAEP00000531	PacBio	exon	26544	26702	.	+	.	gene_id "PBfusion.26"; transcript_id "PBfusion.26.1";
GWHAAEP00000531	PacBio	exon	26803	26871	.	+	.	gene_id "PBfusion.26"; transcript_id "PBfusion.26.1";
GWHAAEP00000531	PacBio	exon	26957	27144	.	+	.	gene_id "PBfusion.26"; transcript_id "PBfusion.26.1";
GWHAAEP00000531	PacBio	exon	27522	27975	.	+	.	gene_id "PBfusion.26"; transcript_id "PBfusion.26.1";
GWHAAEP00010331	PacBio	transcript	11694	13513	.	-	.	gene_id "PBfusion.26"; transcript_id "PBfusion.26.2";
GWHAAEP00010331	PacBio	exon	11694	12147	.	-	.	gene_id "PBfusion.26"; transcript_id "PBfusion.26.2";
GWHAAEP00010331	PacBio	exon	12525	12712	.	-	.	gene_id "PBfusion.26"; transcript_id "PBfusion.26.2";
GWHAAEP00010331	PacBio	exon	12798	12866	.	-	.	gene_id "PBfusion.26"; transcript_id "PBfusion.26.2";
GWHAAEP00010331	PacBio	exon	12967	13125	.	-	.	gene_id "PBfusion.26"; transcript_id "PBfusion.26.2";
GWHAAEP00010331	PacBio	exon	13220	13513	.	-	.	gene_id "PBfusion.26"; transcript_id "PBfusion.26.2";
GWHAAEP00002461	PacBio	transcript	951850	953187	.	-	.	gene_id "PBfusion.1"; transcript_id "PBfusion.1.1";
GWHAAEP00002461	PacBio	exon	951850	953187	.	-	.	gene_id "PBfusion.1"; transcript_id "PBfusion.1.1";
GWHAAEP00006596	PacBio	transcript	221868	223205	.	-	.	gene_id "PBfusion.1"; transcript_id "PBfusion.1.2";
GWHAAEP00006596	PacBio	exon	221868	223205	.	-	.	gene_id "PBfusion.1"; transcript_id "PBfusion.1.2";
GWHAAEP00001936	PacBio	transcript	999348	1000964	.	-	.	gene_id "PBfusion.116"; transcript_id "PBfusion.116.1";
GWHAAEP00001936	PacBio	exon	999348	1000964	.	-	.	gene_id "PBfusion.116"; transcript_id "PBfusion.116.1";
GWHAAEP00007924	PacBio	transcript	31597	33213	.	-	.	gene_id "PBfusion.116"; transcript_id "PBfusion.116.2";
GWHAAEP00007924	PacBio	exon	31597	33213	.	-	.	gene_id "PBfusion.116"; transcript_id "PBfusion.116.2";
GWHAAEP00002716	PacBio	transcript	151439	152708	.	+	.	gene_id "PBfusion.117"; transcript_id "PBfusion.117.1";
GWHAAEP00002716	PacBio	exon	151439	152708	.	+	.	gene_id "PBfusion.117"; transcript_id "PBfusion.117.1";
GWHAAEP00012270	PacBio	transcript	2876	4145	.	+	.	gene_id "PBfusion.117"; transcript_id "PBfusion.117.2";
GWHAAEP00012270	PacBio	exon	2876	4145	.	+	.	gene_id "PBfusion.117"; transcript_id "PBfusion.117.2";
GWHAAEP00000633	PacBio	transcript	159528	162396	.	+	.	gene_id "PBfusion.114"; transcript_id "PBfusion.114.1";
GWHAAEP00000633	PacBio	exon	159528	159843	.	+	.	gene_id "PBfusion.114"; transcript_id "PBfusion.114.1";
GWHAAEP00000633	PacBio	exon	160337	160425	.	+	.	gene_id "PBfusion.114"; transcript_id "PBfusion.114.1";
GWHAAEP00000633	PacBio	exon	160515	160616	.	+	.	gene_id "PBfusion.114"; transcript_id "PBfusion.114.1";
GWHAAEP00000633	PacBio	exon	160746	160841	.	+	.	gene_id "PBfusion.114"; transcript_id "PBfusion.114.1";
GWHAAEP00000633	PacBio	exon	161079	161186	.	+	.	gene_id "PBfusion.114"; transcript_id "PBfusion.114.1";
GWHAAEP00000633	PacBio	exon	161805	161858	.	+	.	gene_id "PBfusion.114"; transcript_id "PBfusion.114.1";
GWHAAEP00000633	PacBio	exon	162097	162396	.	+	.	gene_id "PBfusion.114"; transcript_id "PBfusion.114.1";
GWHAAEP00000862	PacBio	transcript	212934	215802	.	+	.	gene_id "PBfusion.114"; transcript_id "PBfusion.114.2";
GWHAAEP00000862	PacBio	exon	212934	213249	.	+	.	gene_id "PBfusion.114"; transcript_id "PBfusion.114.2";
GWHAAEP00000862	PacBio	exon	213743	213831	.	+	.	gene_id "PBfusion.114"; transcript_id "PBfusion.114.2";
GWHAAEP00000862	PacBio	exon	213921	214022	.	+	.	gene_id "PBfusion.114"; transcript_id "PBfusion.114.2";
GWHAAEP00000862	PacBio	exon	214152	214247	.	+	.	gene_id "PBfusion.114"; transcript_id "PBfusion.114.2";
GWHAAEP00000862	PacBio	exon	214485	214592	.	+	.	gene_id "PBfusion.114"; transcript_id "PBfusion.114.2";
GWHAAEP00000862	PacBio	exon	215211	215264	.	+	.	gene_id "PBfusion.114"; transcript_id "PBfusion.114.2";
GWHAAEP00000862	PacBio	exon	215503	215802	.	+	.	gene_id "PBfusion.114"; transcript_id "PBfusion.114.2";
GWHAAEP00000633	PacBio	transcript	168392	170743	.	+	.	gene_id "PBfusion.115"; transcript_id "PBfusion.115.1";
GWHAAEP00000633	PacBio	exon	168392	168575	.	+	.	gene_id "PBfusion.115"; transcript_id "PBfusion.115.1";
GWHAAEP00000633	PacBio	exon	168663	168780	.	+	.	gene_id "PBfusion.115"; transcript_id "PBfusion.115.1";
GWHAAEP00000633	PacBio	exon	168856	169069	.	+	.	gene_id "PBfusion.115"; transcript_id "PBfusion.115.1";
GWHAAEP00000633	PacBio	exon	170426	170743	.	+	.	gene_id "PBfusion.115"; transcript_id "PBfusion.115.1";
GWHAAEP00000862	PacBio	transcript	221798	224149	.	+	.	gene_id "PBfusion.115"; transcript_id "PBfusion.115.2";
GWHAAEP00000862	PacBio	exon	221798	221981	.	+	.	gene_id "PBfusion.115"; transcript_id "PBfusion.115.2";
GWHAAEP00000862	PacBio	exon	222069	222186	.	+	.	gene_id "PBfusion.115"; transcript_id "PBfusion.115.2";
GWHAAEP00000862	PacBio	exon	222262	222475	.	+	.	gene_id "PBfusion.115"; transcript_id "PBfusion.115.2";
GWHAAEP00000862	PacBio	exon	223832	224149	.	+	.	gene_id "PBfusion.115"; transcript_id "PBfusion.115.2";
GWHAAEP00002461	PacBio	transcript	771906	774563	.	+	.	gene_id "PBfusion.112"; transcript_id "PBfusion.112.1";
GWHAAEP00002461	PacBio	exon	771906	772379	.	+	.	gene_id "PBfusion.112"; transcript_id "PBfusion.112.1";
GWHAAEP00002461	PacBio	exon	772680	774563	.	+	.	gene_id "PBfusion.112"; transcript_id "PBfusion.112.1";
GWHAAEP00006596	PacBio	transcript	41932	44589	.	+	.	gene_id "PBfusion.112"; transcript_id "PBfusion.112.2";
GWHAAEP00006596	PacBio	exon	41932	42405	.	+	.	gene_id "PBfusion.112"; transcript_id "PBfusion.112.2";
GWHAAEP00006596	PacBio	exon	42706	44589	.	+	.	gene_id "PBfusion.112"; transcript_id "PBfusion.112.2";
GWHAAEP00000633	PacBio	transcript	159421	162396	.	+	.	gene_id "PBfusion.113"; transcript_id "PBfusion.113.1";
GWHAAEP00000633	PacBio	exon	159421	159495	.	+	.	gene_id "PBfusion.113"; transcript_id "PBfusion.113.1";
GWHAAEP00000633	PacBio	exon	160337	160425	.	+	.	gene_id "PBfusion.113"; transcript_id "PBfusion.113.1";
GWHAAEP00000633	PacBio	exon	160515	160616	.	+	.	gene_id "PBfusion.113"; transcript_id "PBfusion.113.1";
GWHAAEP00000633	PacBio	exon	160746	160841	.	+	.	gene_id "PBfusion.113"; transcript_id "PBfusion.113.1";
GWHAAEP00000633	PacBio	exon	161079	161186	.	+	.	gene_id "PBfusion.113"; transcript_id "PBfusion.113.1";
GWHAAEP00000633	PacBio	exon	161805	161858	.	+	.	gene_id "PBfusion.113"; transcript_id "PBfusion.113.1";
GWHAAEP00000633	PacBio	exon	162097	162396	.	+	.	gene_id "PBfusion.113"; transcript_id "PBfusion.113.1";
GWHAAEP00000862	PacBio	transcript	212827	215802	.	+	.	gene_id "PBfusion.113"; transcript_id "PBfusion.113.2";
GWHAAEP00000862	PacBio	exon	212827	212901	.	+	.	gene_id "PBfusion.113"; transcript_id "PBfusion.113.2";
GWHAAEP00000862	PacBio	exon	213743	213831	.	+	.	gene_id "PBfusion.113"; transcript_id "PBfusion.113.2";
GWHAAEP00000862	PacBio	exon	213921	214022	.	+	.	gene_id "PBfusion.113"; transcript_id "PBfusion.113.2";
GWHAAEP00000862	PacBio	exon	214152	214247	.	+	.	gene_id "PBfusion.113"; transcript_id "PBfusion.113.2";
GWHAAEP00000862	PacBio	exon	214485	214592	.	+	.	gene_id "PBfusion.113"; transcript_id "PBfusion.113.2";
GWHAAEP00000862	PacBio	exon	215211	215264	.	+	.	gene_id "PBfusion.113"; transcript_id "PBfusion.113.2";
GWHAAEP00000862	PacBio	exon	215503	215802	.	+	.	gene_id "PBfusion.113"; transcript_id "PBfusion.113.2";
GWHAAEP00002461	PacBio	transcript	787335	792531	.	-	.	gene_id "PBfusion.110"; transcript_id "PBfusion.110.1";
GWHAAEP00002461	PacBio	exon	787335	788990	.	-	.	gene_id "PBfusion.110"; transcript_id "PBfusion.110.1";
GWHAAEP00002461	PacBio	exon	789079	790545	.	-	.	gene_id "PBfusion.110"; transcript_id "PBfusion.110.1";
GWHAAEP00002461	PacBio	exon	790627	791009	.	-	.	gene_id "PBfusion.110"; transcript_id "PBfusion.110.1";
GWHAAEP00002461	PacBio	exon	791180	791573	.	-	.	gene_id "PBfusion.110"; transcript_id "PBfusion.110.1";
GWHAAEP00002461	PacBio	exon	791941	792114	.	-	.	gene_id "PBfusion.110"; transcript_id "PBfusion.110.1";
GWHAAEP00002461	PacBio	exon	792306	792531	.	-	.	gene_id "PBfusion.110"; transcript_id "PBfusion.110.1";
GWHAAEP00006596	PacBio	transcript	57361	62557	.	-	.	gene_id "PBfusion.110"; transcript_id "PBfusion.110.2";
GWHAAEP00006596	PacBio	exon	57361	59016	.	-	.	gene_id "PBfusion.110"; transcript_id "PBfusion.110.2";
GWHAAEP00006596	PacBio	exon	59105	60571	.	-	.	gene_id "PBfusion.110"; transcript_id "PBfusion.110.2";
GWHAAEP00006596	PacBio	exon	60653	61035	.	-	.	gene_id "PBfusion.110"; transcript_id "PBfusion.110.2";
GWHAAEP00006596	PacBio	exon	61206	61599	.	-	.	gene_id "PBfusion.110"; transcript_id "PBfusion.110.2";
GWHAAEP00006596	PacBio	exon	61967	62140	.	-	.	gene_id "PBfusion.110"; transcript_id "PBfusion.110.2";
GWHAAEP00006596	PacBio	exon	62332	62557	.	-	.	gene_id "PBfusion.110"; transcript_id "PBfusion.110.2";
GWHAAEP00000818	PacBio	transcript	148102	149434	.	+	.	gene_id "PBfusion.111"; transcript_id "PBfusion.111.1";
GWHAAEP00000818	PacBio	exon	148102	148798	.	+	.	gene_id "PBfusion.111"; transcript_id "PBfusion.111.1";
GWHAAEP00000818	PacBio	exon	148899	149098	.	+	.	gene_id "PBfusion.111"; transcript_id "PBfusion.111.1";
GWHAAEP00000818	PacBio	exon	149225	149434	.	+	.	gene_id "PBfusion.111"; transcript_id "PBfusion.111.1";
GWHAAEP00010040	PacBio	transcript	289	1621	.	-	.	gene_id "PBfusion.111"; transcript_id "PBfusion.111.2";
GWHAAEP00010040	PacBio	exon	289	498	.	-	.	gene_id "PBfusion.111"; transcript_id "PBfusion.111.2";
GWHAAEP00010040	PacBio	exon	625	824	.	-	.	gene_id "PBfusion.111"; transcript_id "PBfusion.111.2";
GWHAAEP00010040	PacBio	exon	925	1621	.	-	.	gene_id "PBfusion.111"; transcript_id "PBfusion.111.2";
GWHAAEP00000633	PacBio	transcript	132190	136856	.	-	.	gene_id "PBfusion.118"; transcript_id "PBfusion.118.1";
GWHAAEP00000633	PacBio	exon	132190	132398	.	-	.	gene_id "PBfusion.118"; transcript_id "PBfusion.118.1";
GWHAAEP00000633	PacBio	exon	132550	132627	.	-	.	gene_id "PBfusion.118"; transcript_id "PBfusion.118.1";
GWHAAEP00000633	PacBio	exon	132888	133253	.	-	.	gene_id "PBfusion.118"; transcript_id "PBfusion.118.1";
GWHAAEP00000633	PacBio	exon	133416	133490	.	-	.	gene_id "PBfusion.118"; transcript_id "PBfusion.118.1";
GWHAAEP00000633	PacBio	exon	133631	133813	.	-	.	gene_id "PBfusion.118"; transcript_id "PBfusion.118.1";
GWHAAEP00000633	PacBio	exon	133892	134007	.	-	.	gene_id "PBfusion.118"; transcript_id "PBfusion.118.1";
GWHAAEP00000633	PacBio	exon	134736	134817	.	-	.	gene_id "PBfusion.118"; transcript_id "PBfusion.118.1";
GWHAAEP00000633	PacBio	exon	134916	134986	.	-	.	gene_id "PBfusion.118"; transcript_id "PBfusion.118.1";
GWHAAEP00000633	PacBio	exon	135500	135618	.	-	.	gene_id "PBfusion.118"; transcript_id "PBfusion.118.1";
GWHAAEP00000633	PacBio	exon	136552	136856	.	-	.	gene_id "PBfusion.118"; transcript_id "PBfusion.118.1";
GWHAAEP00000862	PacBio	transcript	185596	190262	.	-	.	gene_id "PBfusion.118"; transcript_id "PBfusion.118.2";
GWHAAEP00000862	PacBio	exon	185596	185804	.	-	.	gene_id "PBfusion.118"; transcript_id "PBfusion.118.2";
GWHAAEP00000862	PacBio	exon	185956	186033	.	-	.	gene_id "PBfusion.118"; transcript_id "PBfusion.118.2";
GWHAAEP00000862	PacBio	exon	186294	186659	.	-	.	gene_id "PBfusion.118"; transcript_id "PBfusion.118.2";
GWHAAEP00000862	PacBio	exon	186822	186896	.	-	.	gene_id "PBfusion.118"; transcript_id "PBfusion.118.2";
GWHAAEP00000862	PacBio	exon	187037	187219	.	-	.	gene_id "PBfusion.118"; transcript_id "PBfusion.118.2";
GWHAAEP00000862	PacBio	exon	187298	187413	.	-	.	gene_id "PBfusion.118"; transcript_id "PBfusion.118.2";
GWHAAEP00000862	PacBio	exon	188142	188223	.	-	.	gene_id "PBfusion.118"; transcript_id "PBfusion.118.2";
GWHAAEP00000862	PacBio	exon	188322	188392	.	-	.	gene_id "PBfusion.118"; transcript_id "PBfusion.118.2";
GWHAAEP00000862	PacBio	exon	188906	189024	.	-	.	gene_id "PBfusion.118"; transcript_id "PBfusion.118.2";
GWHAAEP00000862	PacBio	exon	189958	190262	.	-	.	gene_id "PBfusion.118"; transcript_id "PBfusion.118.2";
GWHAAEP00000471	PacBio	transcript	598104	600930	.	-	.	gene_id "PBfusion.119"; transcript_id "PBfusion.119.1";
GWHAAEP00000471	PacBio	exon	598104	598444	.	-	.	gene_id "PBfusion.119"; transcript_id "PBfusion.119.1";
GWHAAEP00000471	PacBio	exon	598510	598607	.	-	.	gene_id "PBfusion.119"; transcript_id "PBfusion.119.1";
GWHAAEP00000471	PacBio	exon	598965	599026	.	-	.	gene_id "PBfusion.119"; transcript_id "PBfusion.119.1";
GWHAAEP00000471	PacBio	exon	599157	599229	.	-	.	gene_id "PBfusion.119"; transcript_id "PBfusion.119.1";
GWHAAEP00000471	PacBio	exon	599380	599522	.	-	.	gene_id "PBfusion.119"; transcript_id "PBfusion.119.1";
GWHAAEP00000471	PacBio	exon	599620	599667	.	-	.	gene_id "PBfusion.119"; transcript_id "PBfusion.119.1";
GWHAAEP00000471	PacBio	exon	599750	599824	.	-	.	gene_id "PBfusion.119"; transcript_id "PBfusion.119.1";
GWHAAEP00000471	PacBio	exon	600684	600775	.	-	.	gene_id "PBfusion.119"; transcript_id "PBfusion.119.1";
GWHAAEP00000471	PacBio	exon	600874	600930	.	-	.	gene_id "PBfusion.119"; transcript_id "PBfusion.119.1";
GWHAAEP00010699	PacBio	transcript	1237	4332	.	-	.	gene_id "PBfusion.119"; transcript_id "PBfusion.119.2";
GWHAAEP00010699	PacBio	exon	1237	1577	.	-	.	gene_id "PBfusion.119"; transcript_id "PBfusion.119.2";
GWHAAEP00010699	PacBio	exon	1643	1740	.	-	.	gene_id "PBfusion.119"; transcript_id "PBfusion.119.2";
GWHAAEP00010699	PacBio	exon	2098	2159	.	-	.	gene_id "PBfusion.119"; transcript_id "PBfusion.119.2";
GWHAAEP00010699	PacBio	exon	2290	2362	.	-	.	gene_id "PBfusion.119"; transcript_id "PBfusion.119.2";
GWHAAEP00010699	PacBio	exon	2499	2641	.	-	.	gene_id "PBfusion.119"; transcript_id "PBfusion.119.2";
GWHAAEP00010699	PacBio	exon	2739	2786	.	-	.	gene_id "PBfusion.119"; transcript_id "PBfusion.119.2";
GWHAAEP00010699	PacBio	exon	2869	2943	.	-	.	gene_id "PBfusion.119"; transcript_id "PBfusion.119.2";
GWHAAEP00010699	PacBio	exon	4086	4177	.	-	.	gene_id "PBfusion.119"; transcript_id "PBfusion.119.2";
GWHAAEP00010699	PacBio	exon	4276	4332	.	-	.	gene_id "PBfusion.119"; transcript_id "PBfusion.119.2";
GWHAAEP00000633	PacBio	transcript	23468	27843	.	-	.	gene_id "PBfusion.98"; transcript_id "PBfusion.98.1";
GWHAAEP00000633	PacBio	exon	23468	23755	.	-	.	gene_id "PBfusion.98"; transcript_id "PBfusion.98.1";
GWHAAEP00000633	PacBio	exon	24084	25531	.	-	.	gene_id "PBfusion.98"; transcript_id "PBfusion.98.1";
GWHAAEP00000633	PacBio	exon	25807	26168	.	-	.	gene_id "PBfusion.98"; transcript_id "PBfusion.98.1";
GWHAAEP00000633	PacBio	exon	26671	26805	.	-	.	gene_id "PBfusion.98"; transcript_id "PBfusion.98.1";
GWHAAEP00000633	PacBio	exon	26892	26930	.	-	.	gene_id "PBfusion.98"; transcript_id "PBfusion.98.1";
GWHAAEP00000633	PacBio	exon	27130	27195	.	-	.	gene_id "PBfusion.98"; transcript_id "PBfusion.98.1";
GWHAAEP00000633	PacBio	exon	27351	27446	.	-	.	gene_id "PBfusion.98"; transcript_id "PBfusion.98.1";
GWHAAEP00000633	PacBio	exon	27799	27843	.	-	.	gene_id "PBfusion.98"; transcript_id "PBfusion.98.1";
GWHAAEP00000862	PacBio	transcript	76874	81249	.	-	.	gene_id "PBfusion.98"; transcript_id "PBfusion.98.2";
GWHAAEP00000862	PacBio	exon	76874	77161	.	-	.	gene_id "PBfusion.98"; transcript_id "PBfusion.98.2";
GWHAAEP00000862	PacBio	exon	77490	78937	.	-	.	gene_id "PBfusion.98"; transcript_id "PBfusion.98.2";
GWHAAEP00000862	PacBio	exon	79213	79574	.	-	.	gene_id "PBfusion.98"; transcript_id "PBfusion.98.2";
GWHAAEP00000862	PacBio	exon	80077	80211	.	-	.	gene_id "PBfusion.98"; transcript_id "PBfusion.98.2";
GWHAAEP00000862	PacBio	exon	80298	80336	.	-	.	gene_id "PBfusion.98"; transcript_id "PBfusion.98.2";
GWHAAEP00000862	PacBio	exon	80536	80601	.	-	.	gene_id "PBfusion.98"; transcript_id "PBfusion.98.2";
GWHAAEP00000862	PacBio	exon	80757	80852	.	-	.	gene_id "PBfusion.98"; transcript_id "PBfusion.98.2";
GWHAAEP00000862	PacBio	exon	81205	81249	.	-	.	gene_id "PBfusion.98"; transcript_id "PBfusion.98.2";
GWHAAEP00001279	PacBio	transcript	491014	492192	.	-	.	gene_id "PBfusion.99"; transcript_id "PBfusion.99.1";
GWHAAEP00001279	PacBio	exon	491014	492192	.	-	.	gene_id "PBfusion.99"; transcript_id "PBfusion.99.1";
GWHAAEP00008520	PacBio	transcript	159	1337	.	+	.	gene_id "PBfusion.99"; transcript_id "PBfusion.99.2";
GWHAAEP00008520	PacBio	exon	159	1337	.	+	.	gene_id "PBfusion.99"; transcript_id "PBfusion.99.2";
GWHAAEP00002461	PacBio	transcript	937116	943402	.	+	.	gene_id "PBfusion.94"; transcript_id "PBfusion.94.1";
GWHAAEP00002461	PacBio	exon	937116	938224	.	+	.	gene_id "PBfusion.94"; transcript_id "PBfusion.94.1";
GWHAAEP00002461	PacBio	exon	938977	939026	.	+	.	gene_id "PBfusion.94"; transcript_id "PBfusion.94.1";
GWHAAEP00002461	PacBio	exon	939279	941367	.	+	.	gene_id "PBfusion.94"; transcript_id "PBfusion.94.1";
GWHAAEP00002461	PacBio	exon	941444	941591	.	+	.	gene_id "PBfusion.94"; transcript_id "PBfusion.94.1";
GWHAAEP00002461	PacBio	exon	942511	943402	.	+	.	gene_id "PBfusion.94"; transcript_id "PBfusion.94.1";
GWHAAEP00006596	PacBio	transcript	207134	213420	.	+	.	gene_id "PBfusion.94"; transcript_id "PBfusion.94.2";
GWHAAEP00006596	PacBio	exon	207134	208242	.	+	.	gene_id "PBfusion.94"; transcript_id "PBfusion.94.2";
GWHAAEP00006596	PacBio	exon	208995	209044	.	+	.	gene_id "PBfusion.94"; transcript_id "PBfusion.94.2";
GWHAAEP00006596	PacBio	exon	209297	211385	.	+	.	gene_id "PBfusion.94"; transcript_id "PBfusion.94.2";
GWHAAEP00006596	PacBio	exon	211462	211609	.	+	.	gene_id "PBfusion.94"; transcript_id "PBfusion.94.2";
GWHAAEP00006596	PacBio	exon	212529	213420	.	+	.	gene_id "PBfusion.94"; transcript_id "PBfusion.94.2";
GWHAAEP00001291	PacBio	transcript	38006	41641	.	+	.	gene_id "PBfusion.95"; transcript_id "PBfusion.95.1";
GWHAAEP00001291	PacBio	exon	38006	39498	.	+	.	gene_id "PBfusion.95"; transcript_id "PBfusion.95.1";
GWHAAEP00001291	PacBio	exon	39588	41641	.	+	.	gene_id "PBfusion.95"; transcript_id "PBfusion.95.1";
GWHAAEP00007848	PacBio	transcript	660	4295	.	+	.	gene_id "PBfusion.95"; transcript_id "PBfusion.95.2";
GWHAAEP00007848	PacBio	exon	660	2152	.	+	.	gene_id "PBfusion.95"; transcript_id "PBfusion.95.2";
GWHAAEP00007848	PacBio	exon	2242	4295	.	+	.	gene_id "PBfusion.95"; transcript_id "PBfusion.95.2";
GWHAAEP00005133	PacBio	transcript	1316	3512	.	-	.	gene_id "PBfusion.96"; transcript_id "PBfusion.96.1";
GWHAAEP00005133	PacBio	exon	1316	3512	.	-	.	gene_id "PBfusion.96"; transcript_id "PBfusion.96.1";
GWHAAEP00011380	PacBio	transcript	37504	39700	.	-	.	gene_id "PBfusion.96"; transcript_id "PBfusion.96.2";
GWHAAEP00011380	PacBio	exon	37504	39700	.	-	.	gene_id "PBfusion.96"; transcript_id "PBfusion.96.2";
GWHAAEP00002461	PacBio	transcript	952933	961302	.	-	.	gene_id "PBfusion.97"; transcript_id "PBfusion.97.1";
GWHAAEP00002461	PacBio	exon	952933	953507	.	-	.	gene_id "PBfusion.97"; transcript_id "PBfusion.97.1";
GWHAAEP00002461	PacBio	exon	954860	955073	.	-	.	gene_id "PBfusion.97"; transcript_id "PBfusion.97.1";
GWHAAEP00002461	PacBio	exon	955175	955364	.	-	.	gene_id "PBfusion.97"; transcript_id "PBfusion.97.1";
GWHAAEP00002461	PacBio	exon	957997	958167	.	-	.	gene_id "PBfusion.97"; transcript_id "PBfusion.97.1";
GWHAAEP00002461	PacBio	exon	958309	958473	.	-	.	gene_id "PBfusion.97"; transcript_id "PBfusion.97.1";
GWHAAEP00002461	PacBio	exon	958673	958825	.	-	.	gene_id "PBfusion.97"; transcript_id "PBfusion.97.1";
GWHAAEP00002461	PacBio	exon	959027	959179	.	-	.	gene_id "PBfusion.97"; transcript_id "PBfusion.97.1";
GWHAAEP00002461	PacBio	exon	959532	959699	.	-	.	gene_id "PBfusion.97"; transcript_id "PBfusion.97.1";
GWHAAEP00002461	PacBio	exon	959961	960110	.	-	.	gene_id "PBfusion.97"; transcript_id "PBfusion.97.1";
GWHAAEP00002461	PacBio	exon	960860	961302	.	-	.	gene_id "PBfusion.97"; transcript_id "PBfusion.97.1";
GWHAAEP00006596	PacBio	transcript	222951	231320	.	-	.	gene_id "PBfusion.97"; transcript_id "PBfusion.97.2";
GWHAAEP00006596	PacBio	exon	222951	223525	.	-	.	gene_id "PBfusion.97"; transcript_id "PBfusion.97.2";
GWHAAEP00006596	PacBio	exon	224878	225091	.	-	.	gene_id "PBfusion.97"; transcript_id "PBfusion.97.2";
GWHAAEP00006596	PacBio	exon	225193	225382	.	-	.	gene_id "PBfusion.97"; transcript_id "PBfusion.97.2";
GWHAAEP00006596	PacBio	exon	228015	228185	.	-	.	gene_id "PBfusion.97"; transcript_id "PBfusion.97.2";
GWHAAEP00006596	PacBio	exon	228327	228491	.	-	.	gene_id "PBfusion.97"; transcript_id "PBfusion.97.2";
GWHAAEP00006596	PacBio	exon	228691	228843	.	-	.	gene_id "PBfusion.97"; transcript_id "PBfusion.97.2";
GWHAAEP00006596	PacBio	exon	229045	229197	.	-	.	gene_id "PBfusion.97"; transcript_id "PBfusion.97.2";
GWHAAEP00006596	PacBio	exon	229550	229717	.	-	.	gene_id "PBfusion.97"; transcript_id "PBfusion.97.2";
GWHAAEP00006596	PacBio	exon	229979	230128	.	-	.	gene_id "PBfusion.97"; transcript_id "PBfusion.97.2";
GWHAAEP00006596	PacBio	exon	230878	231320	.	-	.	gene_id "PBfusion.97"; transcript_id "PBfusion.97.2";
GWHAAEP00001069	PacBio	transcript	27127	28611	.	-	.	gene_id "PBfusion.90"; transcript_id "PBfusion.90.1";
GWHAAEP00001069	PacBio	exon	27127	28611	.	-	.	gene_id "PBfusion.90"; transcript_id "PBfusion.90.1";
GWHAAEP00001078	PacBio	transcript	50777	52261	.	-	.	gene_id "PBfusion.90"; transcript_id "PBfusion.90.2";
GWHAAEP00001078	PacBio	exon	50777	52261	.	-	.	gene_id "PBfusion.90"; transcript_id "PBfusion.90.2";
GWHAAEP00002262	PacBio	transcript	23389	24411	.	-	.	gene_id "PBfusion.91"; transcript_id "PBfusion.91.1";
GWHAAEP00002262	PacBio	exon	23389	23628	.	-	.	gene_id "PBfusion.91"; transcript_id "PBfusion.91.1";
GWHAAEP00002262	PacBio	exon	23656	23730	.	-	.	gene_id "PBfusion.91"; transcript_id "PBfusion.91.1";
GWHAAEP00002262	PacBio	exon	23860	24411	.	-	.	gene_id "PBfusion.91"; transcript_id "PBfusion.91.1";
GWHAAEP00006309	PacBio	transcript	325974	326996	.	+	.	gene_id "PBfusion.91"; transcript_id "PBfusion.91.2";
GWHAAEP00006309	PacBio	exon	325974	326525	.	+	.	gene_id "PBfusion.91"; transcript_id "PBfusion.91.2";
GWHAAEP00006309	PacBio	exon	326655	326708	.	+	.	gene_id "PBfusion.91"; transcript_id "PBfusion.91.2";
GWHAAEP00006309	PacBio	exon	326736	326996	.	+	.	gene_id "PBfusion.91"; transcript_id "PBfusion.91.2";
GWHAAEP00000633	PacBio	transcript	73656	77899	.	+	.	gene_id "PBfusion.92"; transcript_id "PBfusion.92.1";
GWHAAEP00000633	PacBio	exon	73656	73748	.	+	.	gene_id "PBfusion.92"; transcript_id "PBfusion.92.1";
GWHAAEP00000633	PacBio	exon	74202	74300	.	+	.	gene_id "PBfusion.92"; transcript_id "PBfusion.92.1";
GWHAAEP00000633	PacBio	exon	74608	74649	.	+	.	gene_id "PBfusion.92"; transcript_id "PBfusion.92.1";
GWHAAEP00000633	PacBio	exon	75042	75221	.	+	.	gene_id "PBfusion.92"; transcript_id "PBfusion.92.1";
GWHAAEP00000633	PacBio	exon	75311	75475	.	+	.	gene_id "PBfusion.92"; transcript_id "PBfusion.92.1";
GWHAAEP00000633	PacBio	exon	75850	76050	.	+	.	gene_id "PBfusion.92"; transcript_id "PBfusion.92.1";
GWHAAEP00000633	PacBio	exon	76423	76920	.	+	.	gene_id "PBfusion.92"; transcript_id "PBfusion.92.1";
GWHAAEP00000633	PacBio	exon	77017	77151	.	+	.	gene_id "PBfusion.92"; transcript_id "PBfusion.92.1";
GWHAAEP00000633	PacBio	exon	77233	77899	.	+	.	gene_id "PBfusion.92"; transcript_id "PBfusion.92.1";
GWHAAEP00000862	PacBio	transcript	127062	131305	.	+	.	gene_id "PBfusion.92"; transcript_id "PBfusion.92.2";
GWHAAEP00000862	PacBio	exon	127062	127154	.	+	.	gene_id "PBfusion.92"; transcript_id "PBfusion.92.2";
GWHAAEP00000862	PacBio	exon	127608	127706	.	+	.	gene_id "PBfusion.92"; transcript_id "PBfusion.92.2";
GWHAAEP00000862	PacBio	exon	128014	128055	.	+	.	gene_id "PBfusion.92"; transcript_id "PBfusion.92.2";
GWHAAEP00000862	PacBio	exon	128448	128627	.	+	.	gene_id "PBfusion.92"; transcript_id "PBfusion.92.2";
GWHAAEP00000862	PacBio	exon	128717	128881	.	+	.	gene_id "PBfusion.92"; transcript_id "PBfusion.92.2";
GWHAAEP00000862	PacBio	exon	129256	129456	.	+	.	gene_id "PBfusion.92"; transcript_id "PBfusion.92.2";
GWHAAEP00000862	PacBio	exon	129829	130326	.	+	.	gene_id "PBfusion.92"; transcript_id "PBfusion.92.2";
GWHAAEP00000862	PacBio	exon	130423	130557	.	+	.	gene_id "PBfusion.92"; transcript_id "PBfusion.92.2";
GWHAAEP00000862	PacBio	exon	130639	131305	.	+	.	gene_id "PBfusion.92"; transcript_id "PBfusion.92.2";
GWHAAEP00000845	PacBio	transcript	1166407	1167336	.	+	.	gene_id "PBfusion.93"; transcript_id "PBfusion.93.1";
GWHAAEP00000845	PacBio	exon	1166407	1167336	.	+	.	gene_id "PBfusion.93"; transcript_id "PBfusion.93.1";
GWHAAEP00006309	PacBio	transcript	320019	320948	.	-	.	gene_id "PBfusion.93"; transcript_id "PBfusion.93.2";
GWHAAEP00006309	PacBio	exon	320019	320948	.	-	.	gene_id "PBfusion.93"; transcript_id "PBfusion.93.2";
GWHAAEP00002461	PacBio	transcript	953064	961165	.	-	.	gene_id "PBfusion.38"; transcript_id "PBfusion.38.1";
GWHAAEP00002461	PacBio	exon	953064	953507	.	-	.	gene_id "PBfusion.38"; transcript_id "PBfusion.38.1";
GWHAAEP00002461	PacBio	exon	954860	955073	.	-	.	gene_id "PBfusion.38"; transcript_id "PBfusion.38.1";
GWHAAEP00002461	PacBio	exon	955175	955364	.	-	.	gene_id "PBfusion.38"; transcript_id "PBfusion.38.1";
GWHAAEP00002461	PacBio	exon	956351	958167	.	-	.	gene_id "PBfusion.38"; transcript_id "PBfusion.38.1";
GWHAAEP00002461	PacBio	exon	958309	958473	.	-	.	gene_id "PBfusion.38"; transcript_id "PBfusion.38.1";
GWHAAEP00002461	PacBio	exon	958673	958825	.	-	.	gene_id "PBfusion.38"; transcript_id "PBfusion.38.1";
GWHAAEP00002461	PacBio	exon	959027	959179	.	-	.	gene_id "PBfusion.38"; transcript_id "PBfusion.38.1";
GWHAAEP00002461	PacBio	exon	959532	959699	.	-	.	gene_id "PBfusion.38"; transcript_id "PBfusion.38.1";
GWHAAEP00002461	PacBio	exon	959961	960110	.	-	.	gene_id "PBfusion.38"; transcript_id "PBfusion.38.1";
GWHAAEP00002461	PacBio	exon	960860	961165	.	-	.	gene_id "PBfusion.38"; transcript_id "PBfusion.38.1";
GWHAAEP00006596	PacBio	transcript	223082	231183	.	-	.	gene_id "PBfusion.38"; transcript_id "PBfusion.38.2";
GWHAAEP00006596	PacBio	exon	223082	223525	.	-	.	gene_id "PBfusion.38"; transcript_id "PBfusion.38.2";
GWHAAEP00006596	PacBio	exon	224878	225091	.	-	.	gene_id "PBfusion.38"; transcript_id "PBfusion.38.2";
GWHAAEP00006596	PacBio	exon	225193	225382	.	-	.	gene_id "PBfusion.38"; transcript_id "PBfusion.38.2";
GWHAAEP00006596	PacBio	exon	226369	228185	.	-	.	gene_id "PBfusion.38"; transcript_id "PBfusion.38.2";
GWHAAEP00006596	PacBio	exon	228327	228491	.	-	.	gene_id "PBfusion.38"; transcript_id "PBfusion.38.2";
GWHAAEP00006596	PacBio	exon	228691	228843	.	-	.	gene_id "PBfusion.38"; transcript_id "PBfusion.38.2";
GWHAAEP00006596	PacBio	exon	229045	229197	.	-	.	gene_id "PBfusion.38"; transcript_id "PBfusion.38.2";
GWHAAEP00006596	PacBio	exon	229550	229717	.	-	.	gene_id "PBfusion.38"; transcript_id "PBfusion.38.2";
GWHAAEP00006596	PacBio	exon	229979	230128	.	-	.	gene_id "PBfusion.38"; transcript_id "PBfusion.38.2";
GWHAAEP00006596	PacBio	exon	230878	231183	.	-	.	gene_id "PBfusion.38"; transcript_id "PBfusion.38.2";
GWHAAEP00000590	PacBio	transcript	119378	123781	.	+	.	gene_id "PBfusion.39"; transcript_id "PBfusion.39.1";
GWHAAEP00000590	PacBio	exon	119378	120559	.	+	.	gene_id "PBfusion.39"; transcript_id "PBfusion.39.1";
GWHAAEP00000590	PacBio	exon	120773	120841	.	+	.	gene_id "PBfusion.39"; transcript_id "PBfusion.39.1";
GWHAAEP00000590	PacBio	exon	120972	121054	.	+	.	gene_id "PBfusion.39"; transcript_id "PBfusion.39.1";
GWHAAEP00000590	PacBio	exon	121726	121778	.	+	.	gene_id "PBfusion.39"; transcript_id "PBfusion.39.1";
GWHAAEP00000590	PacBio	exon	121888	122012	.	+	.	gene_id "PBfusion.39"; transcript_id "PBfusion.39.1";
GWHAAEP00000590	PacBio	exon	122119	122146	.	+	.	gene_id "PBfusion.39"; transcript_id "PBfusion.39.1";
GWHAAEP00000590	PacBio	exon	122259	122569	.	+	.	gene_id "PBfusion.39"; transcript_id "PBfusion.39.1";
GWHAAEP00000590	PacBio	exon	122654	122744	.	+	.	gene_id "PBfusion.39"; transcript_id "PBfusion.39.1";
GWHAAEP00000590	PacBio	exon	123009	123781	.	+	.	gene_id "PBfusion.39"; transcript_id "PBfusion.39.1";
GWHAAEP00002135	PacBio	transcript	30977	35380	.	-	.	gene_id "PBfusion.39"; transcript_id "PBfusion.39.2";
GWHAAEP00002135	PacBio	exon	30977	31749	.	-	.	gene_id "PBfusion.39"; transcript_id "PBfusion.39.2";
GWHAAEP00002135	PacBio	exon	32014	32104	.	-	.	gene_id "PBfusion.39"; transcript_id "PBfusion.39.2";
GWHAAEP00002135	PacBio	exon	32189	32499	.	-	.	gene_id "PBfusion.39"; transcript_id "PBfusion.39.2";
GWHAAEP00002135	PacBio	exon	32612	32639	.	-	.	gene_id "PBfusion.39"; transcript_id "PBfusion.39.2";
GWHAAEP00002135	PacBio	exon	32746	32870	.	-	.	gene_id "PBfusion.39"; transcript_id "PBfusion.39.2";
GWHAAEP00002135	PacBio	exon	32980	33032	.	-	.	gene_id "PBfusion.39"; transcript_id "PBfusion.39.2";
GWHAAEP00002135	PacBio	exon	33704	33786	.	-	.	gene_id "PBfusion.39"; transcript_id "PBfusion.39.2";
GWHAAEP00002135	PacBio	exon	33917	33985	.	-	.	gene_id "PBfusion.39"; transcript_id "PBfusion.39.2";
GWHAAEP00002135	PacBio	exon	34199	35380	.	-	.	gene_id "PBfusion.39"; transcript_id "PBfusion.39.2";
GWHAAEP00000633	PacBio	transcript	131974	136872	.	-	.	gene_id "PBfusion.36"; transcript_id "PBfusion.36.1";
GWHAAEP00000633	PacBio	exon	131974	132398	.	-	.	gene_id "PBfusion.36"; transcript_id "PBfusion.36.1";
GWHAAEP00000633	PacBio	exon	132550	132627	.	-	.	gene_id "PBfusion.36"; transcript_id "PBfusion.36.1";
GWHAAEP00000633	PacBio	exon	132888	133253	.	-	.	gene_id "PBfusion.36"; transcript_id "PBfusion.36.1";
GWHAAEP00000633	PacBio	exon	133416	133490	.	-	.	gene_id "PBfusion.36"; transcript_id "PBfusion.36.1";
GWHAAEP00000633	PacBio	exon	133631	133813	.	-	.	gene_id "PBfusion.36"; transcript_id "PBfusion.36.1";
GWHAAEP00000633	PacBio	exon	133892	134007	.	-	.	gene_id "PBfusion.36"; transcript_id "PBfusion.36.1";
GWHAAEP00000633	PacBio	exon	134282	134817	.	-	.	gene_id "PBfusion.36"; transcript_id "PBfusion.36.1";
GWHAAEP00000633	PacBio	exon	134916	134986	.	-	.	gene_id "PBfusion.36"; transcript_id "PBfusion.36.1";
GWHAAEP00000633	PacBio	exon	135500	135618	.	-	.	gene_id "PBfusion.36"; transcript_id "PBfusion.36.1";
GWHAAEP00000633	PacBio	exon	136552	136872	.	-	.	gene_id "PBfusion.36"; transcript_id "PBfusion.36.1";
GWHAAEP00000862	PacBio	transcript	185380	190278	.	-	.	gene_id "PBfusion.36"; transcript_id "PBfusion.36.2";
GWHAAEP00000862	PacBio	exon	185380	185804	.	-	.	gene_id "PBfusion.36"; transcript_id "PBfusion.36.2";
GWHAAEP00000862	PacBio	exon	185956	186033	.	-	.	gene_id "PBfusion.36"; transcript_id "PBfusion.36.2";
GWHAAEP00000862	PacBio	exon	186294	186659	.	-	.	gene_id "PBfusion.36"; transcript_id "PBfusion.36.2";
GWHAAEP00000862	PacBio	exon	186822	186896	.	-	.	gene_id "PBfusion.36"; transcript_id "PBfusion.36.2";
GWHAAEP00000862	PacBio	exon	187037	187219	.	-	.	gene_id "PBfusion.36"; transcript_id "PBfusion.36.2";
GWHAAEP00000862	PacBio	exon	187298	187413	.	-	.	gene_id "PBfusion.36"; transcript_id "PBfusion.36.2";
GWHAAEP00000862	PacBio	exon	187688	188223	.	-	.	gene_id "PBfusion.36"; transcript_id "PBfusion.36.2";
GWHAAEP00000862	PacBio	exon	188322	188392	.	-	.	gene_id "PBfusion.36"; transcript_id "PBfusion.36.2";
GWHAAEP00000862	PacBio	exon	188906	189024	.	-	.	gene_id "PBfusion.36"; transcript_id "PBfusion.36.2";
GWHAAEP00000862	PacBio	exon	189958	190278	.	-	.	gene_id "PBfusion.36"; transcript_id "PBfusion.36.2";
GWHAAEP00000590	PacBio	transcript	40447	42101	.	-	.	gene_id "PBfusion.37"; transcript_id "PBfusion.37.1";
GWHAAEP00000590	PacBio	exon	40447	41266	.	-	.	gene_id "PBfusion.37"; transcript_id "PBfusion.37.1";
GWHAAEP00000590	PacBio	exon	41536	41659	.	-	.	gene_id "PBfusion.37"; transcript_id "PBfusion.37.1";
GWHAAEP00000590	PacBio	exon	41809	41951	.	-	.	gene_id "PBfusion.37"; transcript_id "PBfusion.37.1";
GWHAAEP00000590	PacBio	exon	42083	42101	.	-	.	gene_id "PBfusion.37"; transcript_id "PBfusion.37.1";
GWHAAEP00002135	PacBio	transcript	112658	114312	.	+	.	gene_id "PBfusion.37"; transcript_id "PBfusion.37.2";
GWHAAEP00002135	PacBio	exon	112658	112676	.	+	.	gene_id "PBfusion.37"; transcript_id "PBfusion.37.2";
GWHAAEP00002135	PacBio	exon	112808	112950	.	+	.	gene_id "PBfusion.37"; transcript_id "PBfusion.37.2";
GWHAAEP00002135	PacBio	exon	113100	113223	.	+	.	gene_id "PBfusion.37"; transcript_id "PBfusion.37.2";
GWHAAEP00002135	PacBio	exon	113493	114312	.	+	.	gene_id "PBfusion.37"; transcript_id "PBfusion.37.2";
GWHAAEP00002461	PacBio	transcript	953090	961339	.	-	.	gene_id "PBfusion.34"; transcript_id "PBfusion.34.1";
GWHAAEP00002461	PacBio	exon	953090	953507	.	-	.	gene_id "PBfusion.34"; transcript_id "PBfusion.34.1";
GWHAAEP00002461	PacBio	exon	954860	955073	.	-	.	gene_id "PBfusion.34"; transcript_id "PBfusion.34.1";
GWHAAEP00002461	PacBio	exon	955175	955364	.	-	.	gene_id "PBfusion.34"; transcript_id "PBfusion.34.1";
GWHAAEP00002461	PacBio	exon	957997	958167	.	-	.	gene_id "PBfusion.34"; transcript_id "PBfusion.34.1";
GWHAAEP00002461	PacBio	exon	958309	958473	.	-	.	gene_id "PBfusion.34"; transcript_id "PBfusion.34.1";
GWHAAEP00002461	PacBio	exon	958673	959179	.	-	.	gene_id "PBfusion.34"; transcript_id "PBfusion.34.1";
GWHAAEP00002461	PacBio	exon	959532	959699	.	-	.	gene_id "PBfusion.34"; transcript_id "PBfusion.34.1";
GWHAAEP00002461	PacBio	exon	959961	960110	.	-	.	gene_id "PBfusion.34"; transcript_id "PBfusion.34.1";
GWHAAEP00002461	PacBio	exon	960860	961339	.	-	.	gene_id "PBfusion.34"; transcript_id "PBfusion.34.1";
GWHAAEP00006596	PacBio	transcript	223108	231357	.	-	.	gene_id "PBfusion.34"; transcript_id "PBfusion.34.2";
GWHAAEP00006596	PacBio	exon	223108	223525	.	-	.	gene_id "PBfusion.34"; transcript_id "PBfusion.34.2";
GWHAAEP00006596	PacBio	exon	224878	225091	.	-	.	gene_id "PBfusion.34"; transcript_id "PBfusion.34.2";
GWHAAEP00006596	PacBio	exon	225193	225382	.	-	.	gene_id "PBfusion.34"; transcript_id "PBfusion.34.2";
GWHAAEP00006596	PacBio	exon	228015	228185	.	-	.	gene_id "PBfusion.34"; transcript_id "PBfusion.34.2";
GWHAAEP00006596	PacBio	exon	228327	228491	.	-	.	gene_id "PBfusion.34"; transcript_id "PBfusion.34.2";
GWHAAEP00006596	PacBio	exon	228691	229197	.	-	.	gene_id "PBfusion.34"; transcript_id "PBfusion.34.2";
GWHAAEP00006596	PacBio	exon	229550	229717	.	-	.	gene_id "PBfusion.34"; transcript_id "PBfusion.34.2";
GWHAAEP00006596	PacBio	exon	229979	230128	.	-	.	gene_id "PBfusion.34"; transcript_id "PBfusion.34.2";
GWHAAEP00006596	PacBio	exon	230878	231357	.	-	.	gene_id "PBfusion.34"; transcript_id "PBfusion.34.2";
GWHAAEP00000432	PacBio	transcript	414915	419534	.	-	.	gene_id "PBfusion.35"; transcript_id "PBfusion.35.1";
GWHAAEP00000432	PacBio	exon	414915	415914	.	-	.	gene_id "PBfusion.35"; transcript_id "PBfusion.35.1";
GWHAAEP00000432	PacBio	exon	419273	419534	.	-	.	gene_id "PBfusion.35"; transcript_id "PBfusion.35.1";
GWHAAEP00003221	PacBio	transcript	12068	13329	.	-	.	gene_id "PBfusion.35"; transcript_id "PBfusion.35.2";
GWHAAEP00003221	PacBio	exon	12068	13329	.	-	.	gene_id "PBfusion.35"; transcript_id "PBfusion.35.2";
GWHAAEP00000585	PacBio	transcript	4530	5789	.	+	.	gene_id "PBfusion.32"; transcript_id "PBfusion.32.1";
GWHAAEP00000585	PacBio	exon	4530	5789	.	+	.	gene_id "PBfusion.32"; transcript_id "PBfusion.32.1";
GWHAAEP00001279	PacBio	transcript	216865	218125	.	-	.	gene_id "PBfusion.32"; transcript_id "PBfusion.32.2";
GWHAAEP00001279	PacBio	exon	216865	218125	.	-	.	gene_id "PBfusion.32"; transcript_id "PBfusion.32.2";
GWHAAEP00004424	PacBio	transcript	2328	3482	.	-	.	gene_id "PBfusion.33"; transcript_id "PBfusion.33.1";
GWHAAEP00004424	PacBio	exon	2328	3482	.	-	.	gene_id "PBfusion.33"; transcript_id "PBfusion.33.1";
GWHAAEP00004838	PacBio	transcript	98770	99924	.	-	.	gene_id "PBfusion.33"; transcript_id "PBfusion.33.2";
GWHAAEP00004838	PacBio	exon	98770	99924	.	-	.	gene_id "PBfusion.33"; transcript_id "PBfusion.33.2";
GWHAAEP00003533	PacBio	transcript	282358	285683	.	-	.	gene_id "PBfusion.30"; transcript_id "PBfusion.30.1";
GWHAAEP00003533	PacBio	exon	282358	282634	.	-	.	gene_id "PBfusion.30"; transcript_id "PBfusion.30.1";
GWHAAEP00003533	PacBio	exon	283260	285683	.	-	.	gene_id "PBfusion.30"; transcript_id "PBfusion.30.1";
GWHAAEP00005958	PacBio	transcript	6819	10144	.	-	.	gene_id "PBfusion.30"; transcript_id "PBfusion.30.2";
GWHAAEP00005958	PacBio	exon	6819	7095	.	-	.	gene_id "PBfusion.30"; transcript_id "PBfusion.30.2";
GWHAAEP00005958	PacBio	exon	7721	10144	.	-	.	gene_id "PBfusion.30"; transcript_id "PBfusion.30.2";
GWHAAEP00000633	PacBio	transcript	7173	16996	.	-	.	gene_id "PBfusion.31"; transcript_id "PBfusion.31.1";
GWHAAEP00000633	PacBio	exon	7173	7985	.	-	.	gene_id "PBfusion.31"; transcript_id "PBfusion.31.1";
GWHAAEP00000633	PacBio	exon	8109	8194	.	-	.	gene_id "PBfusion.31"; transcript_id "PBfusion.31.1";
GWHAAEP00000633	PacBio	exon	8646	8759	.	-	.	gene_id "PBfusion.31"; transcript_id "PBfusion.31.1";
GWHAAEP00000633	PacBio	exon	10179	10548	.	-	.	gene_id "PBfusion.31"; transcript_id "PBfusion.31.1";
GWHAAEP00000633	PacBio	exon	11301	11455	.	-	.	gene_id "PBfusion.31"; transcript_id "PBfusion.31.1";
GWHAAEP00000633	PacBio	exon	12622	12730	.	-	.	gene_id "PBfusion.31"; transcript_id "PBfusion.31.1";
GWHAAEP00000633	PacBio	exon	13533	13654	.	-	.	gene_id "PBfusion.31"; transcript_id "PBfusion.31.1";
GWHAAEP00000633	PacBio	exon	14165	14271	.	-	.	gene_id "PBfusion.31"; transcript_id "PBfusion.31.1";
GWHAAEP00000633	PacBio	exon	14647	14751	.	-	.	gene_id "PBfusion.31"; transcript_id "PBfusion.31.1";
GWHAAEP00000633	PacBio	exon	14850	15008	.	-	.	gene_id "PBfusion.31"; transcript_id "PBfusion.31.1";
GWHAAEP00000633	PacBio	exon	15379	16053	.	-	.	gene_id "PBfusion.31"; transcript_id "PBfusion.31.1";
GWHAAEP00000633	PacBio	exon	16274	16996	.	-	.	gene_id "PBfusion.31"; transcript_id "PBfusion.31.1";
GWHAAEP00000862	PacBio	transcript	60579	70402	.	-	.	gene_id "PBfusion.31"; transcript_id "PBfusion.31.2";
GWHAAEP00000862	PacBio	exon	60579	61391	.	-	.	gene_id "PBfusion.31"; transcript_id "PBfusion.31.2";
GWHAAEP00000862	PacBio	exon	61515	61600	.	-	.	gene_id "PBfusion.31"; transcript_id "PBfusion.31.2";
GWHAAEP00000862	PacBio	exon	62052	62165	.	-	.	gene_id "PBfusion.31"; transcript_id "PBfusion.31.2";
GWHAAEP00000862	PacBio	exon	63585	63954	.	-	.	gene_id "PBfusion.31"; transcript_id "PBfusion.31.2";
GWHAAEP00000862	PacBio	exon	64707	64861	.	-	.	gene_id "PBfusion.31"; transcript_id "PBfusion.31.2";
GWHAAEP00000862	PacBio	exon	66028	66136	.	-	.	gene_id "PBfusion.31"; transcript_id "PBfusion.31.2";
GWHAAEP00000862	PacBio	exon	66939	67060	.	-	.	gene_id "PBfusion.31"; transcript_id "PBfusion.31.2";
GWHAAEP00000862	PacBio	exon	67571	67677	.	-	.	gene_id "PBfusion.31"; transcript_id "PBfusion.31.2";
GWHAAEP00000862	PacBio	exon	68053	68157	.	-	.	gene_id "PBfusion.31"; transcript_id "PBfusion.31.2";
GWHAAEP00000862	PacBio	exon	68256	68414	.	-	.	gene_id "PBfusion.31"; transcript_id "PBfusion.31.2";
GWHAAEP00000862	PacBio	exon	68785	69459	.	-	.	gene_id "PBfusion.31"; transcript_id "PBfusion.31.2";
GWHAAEP00000862	PacBio	exon	69680	70402	.	-	.	gene_id "PBfusion.31"; transcript_id "PBfusion.31.2";
GWHAAEP00001459	PacBio	transcript	8793	9530	.	-	.	gene_id "PBfusion.126"; transcript_id "PBfusion.126.1";
GWHAAEP00001459	PacBio	exon	8793	9530	.	-	.	gene_id "PBfusion.126"; transcript_id "PBfusion.126.1";
GWHAAEP00004300	PacBio	transcript	767821	768558	.	-	.	gene_id "PBfusion.126"; transcript_id "PBfusion.126.2";
GWHAAEP00004300	PacBio	exon	767821	768558	.	-	.	gene_id "PBfusion.126"; transcript_id "PBfusion.126.2";
GWHAAEP00005210	PacBio	transcript	294253	297448	.	-	.	gene_id "PBfusion.101"; transcript_id "PBfusion.101.1";
GWHAAEP00005210	PacBio	exon	294253	294785	.	-	.	gene_id "PBfusion.101"; transcript_id "PBfusion.101.1";
GWHAAEP00005210	PacBio	exon	294906	297448	.	-	.	gene_id "PBfusion.101"; transcript_id "PBfusion.101.1";
GWHAAEP00005347	PacBio	transcript	35659	38854	.	+	.	gene_id "PBfusion.101"; transcript_id "PBfusion.101.2";
GWHAAEP00005347	PacBio	exon	35659	38201	.	+	.	gene_id "PBfusion.101"; transcript_id "PBfusion.101.2";
GWHAAEP00005347	PacBio	exon	38322	38854	.	+	.	gene_id "PBfusion.101"; transcript_id "PBfusion.101.2";
GWHAAEP00001395	PacBio	transcript	100167	103197	.	-	.	gene_id "PBfusion.100"; transcript_id "PBfusion.100.1";
GWHAAEP00001395	PacBio	exon	100167	100533	.	-	.	gene_id "PBfusion.100"; transcript_id "PBfusion.100.1";
GWHAAEP00001395	PacBio	exon	101372	101449	.	-	.	gene_id "PBfusion.100"; transcript_id "PBfusion.100.1";
GWHAAEP00001395	PacBio	exon	101557	101625	.	-	.	gene_id "PBfusion.100"; transcript_id "PBfusion.100.1";
GWHAAEP00001395	PacBio	exon	101909	101974	.	-	.	gene_id "PBfusion.100"; transcript_id "PBfusion.100.1";
GWHAAEP00001395	PacBio	exon	102198	102401	.	-	.	gene_id "PBfusion.100"; transcript_id "PBfusion.100.1";
GWHAAEP00001395	PacBio	exon	102972	103197	.	-	.	gene_id "PBfusion.100"; transcript_id "PBfusion.100.1";
GWHAAEP00006073	PacBio	transcript	351	3581	.	-	.	gene_id "PBfusion.100"; transcript_id "PBfusion.100.2";
GWHAAEP00006073	PacBio	exon	351	717	.	-	.	gene_id "PBfusion.100"; transcript_id "PBfusion.100.2";
GWHAAEP00006073	PacBio	exon	1756	1833	.	-	.	gene_id "PBfusion.100"; transcript_id "PBfusion.100.2";
GWHAAEP00006073	PacBio	exon	1941	2009	.	-	.	gene_id "PBfusion.100"; transcript_id "PBfusion.100.2";
GWHAAEP00006073	PacBio	exon	2293	2358	.	-	.	gene_id "PBfusion.100"; transcript_id "PBfusion.100.2";
GWHAAEP00006073	PacBio	exon	2582	2785	.	-	.	gene_id "PBfusion.100"; transcript_id "PBfusion.100.2";
GWHAAEP00006073	PacBio	exon	3356	3581	.	-	.	gene_id "PBfusion.100"; transcript_id "PBfusion.100.2";
GWHAAEP00000633	PacBio	transcript	79583	85786	.	+	.	gene_id "PBfusion.103"; transcript_id "PBfusion.103.1";
GWHAAEP00000633	PacBio	exon	79583	79747	.	+	.	gene_id "PBfusion.103"; transcript_id "PBfusion.103.1";
GWHAAEP00000633	PacBio	exon	80279	80699	.	+	.	gene_id "PBfusion.103"; transcript_id "PBfusion.103.1";
GWHAAEP00000633	PacBio	exon	81022	81306	.	+	.	gene_id "PBfusion.103"; transcript_id "PBfusion.103.1";
GWHAAEP00000633	PacBio	exon	81408	81725	.	+	.	gene_id "PBfusion.103"; transcript_id "PBfusion.103.1";
GWHAAEP00000633	PacBio	exon	82244	82471	.	+	.	gene_id "PBfusion.103"; transcript_id "PBfusion.103.1";
GWHAAEP00000633	PacBio	exon	83576	83676	.	+	.	gene_id "PBfusion.103"; transcript_id "PBfusion.103.1";
GWHAAEP00000633	PacBio	exon	84321	84438	.	+	.	gene_id "PBfusion.103"; transcript_id "PBfusion.103.1";
GWHAAEP00000633	PacBio	exon	85121	85786	.	+	.	gene_id "PBfusion.103"; transcript_id "PBfusion.103.1";
GWHAAEP00000862	PacBio	transcript	132989	139192	.	+	.	gene_id "PBfusion.103"; transcript_id "PBfusion.103.2";
GWHAAEP00000862	PacBio	exon	132989	133153	.	+	.	gene_id "PBfusion.103"; transcript_id "PBfusion.103.2";
GWHAAEP00000862	PacBio	exon	133685	134105	.	+	.	gene_id "PBfusion.103"; transcript_id "PBfusion.103.2";
GWHAAEP00000862	PacBio	exon	134428	134712	.	+	.	gene_id "PBfusion.103"; transcript_id "PBfusion.103.2";
GWHAAEP00000862	PacBio	exon	134814	135131	.	+	.	gene_id "PBfusion.103"; transcript_id "PBfusion.103.2";
GWHAAEP00000862	PacBio	exon	135650	135877	.	+	.	gene_id "PBfusion.103"; transcript_id "PBfusion.103.2";
GWHAAEP00000862	PacBio	exon	136982	137082	.	+	.	gene_id "PBfusion.103"; transcript_id "PBfusion.103.2";
GWHAAEP00000862	PacBio	exon	137727	137844	.	+	.	gene_id "PBfusion.103"; transcript_id "PBfusion.103.2";
GWHAAEP00000862	PacBio	exon	138527	139192	.	+	.	gene_id "PBfusion.103"; transcript_id "PBfusion.103.2";
GWHAAEP00006498	PacBio	transcript	3255	8869	.	+	.	gene_id "PBfusion.102"; transcript_id "PBfusion.102.1";
GWHAAEP00006498	PacBio	exon	3255	3289	.	+	.	gene_id "PBfusion.102"; transcript_id "PBfusion.102.1";
GWHAAEP00006498	PacBio	exon	7266	7534	.	+	.	gene_id "PBfusion.102"; transcript_id "PBfusion.102.1";
GWHAAEP00006498	PacBio	exon	8539	8869	.	+	.	gene_id "PBfusion.102"; transcript_id "PBfusion.102.1";
GWHAAEP00009119	PacBio	transcript	369314	371627	.	-	.	gene_id "PBfusion.102"; transcript_id "PBfusion.102.2";
GWHAAEP00009119	PacBio	exon	369314	369644	.	-	.	gene_id "PBfusion.102"; transcript_id "PBfusion.102.2";
GWHAAEP00009119	PacBio	exon	370649	370917	.	-	.	gene_id "PBfusion.102"; transcript_id "PBfusion.102.2";
GWHAAEP00009119	PacBio	exon	371593	371627	.	-	.	gene_id "PBfusion.102"; transcript_id "PBfusion.102.2";
GWHAAEP00001320	PacBio	transcript	248	1127	.	-	.	gene_id "PBfusion.105"; transcript_id "PBfusion.105.1";
GWHAAEP00001320	PacBio	exon	248	1127	.	-	.	gene_id "PBfusion.105"; transcript_id "PBfusion.105.1";
GWHAAEP00001542	PacBio	transcript	480239	481118	.	-	.	gene_id "PBfusion.105"; transcript_id "PBfusion.105.2";
GWHAAEP00001542	PacBio	exon	480239	481118	.	-	.	gene_id "PBfusion.105"; transcript_id "PBfusion.105.2";
GWHAAEP00001476	PacBio	transcript	279679	280640	.	-	.	gene_id "PBfusion.104"; transcript_id "PBfusion.104.1";
GWHAAEP00001476	PacBio	exon	279679	280640	.	-	.	gene_id "PBfusion.104"; transcript_id "PBfusion.104.1";
GWHAAEP00017154	PacBio	transcript	234	1195	.	+	.	gene_id "PBfusion.104"; transcript_id "PBfusion.104.2";
GWHAAEP00017154	PacBio	exon	234	1195	.	+	.	gene_id "PBfusion.104"; transcript_id "PBfusion.104.2";
GWHAAEP00000633	PacBio	transcript	91124	101697	.	-	.	gene_id "PBfusion.107"; transcript_id "PBfusion.107.1";
GWHAAEP00000633	PacBio	exon	91124	91356	.	-	.	gene_id "PBfusion.107"; transcript_id "PBfusion.107.1";
GWHAAEP00000633	PacBio	exon	91815	91940	.	-	.	gene_id "PBfusion.107"; transcript_id "PBfusion.107.1";
GWHAAEP00000633	PacBio	exon	92102	92173	.	-	.	gene_id "PBfusion.107"; transcript_id "PBfusion.107.1";
GWHAAEP00000633	PacBio	exon	92587	92669	.	-	.	gene_id "PBfusion.107"; transcript_id "PBfusion.107.1";
GWHAAEP00000633	PacBio	exon	93041	93132	.	-	.	gene_id "PBfusion.107"; transcript_id "PBfusion.107.1";
GWHAAEP00000633	PacBio	exon	94456	94870	.	-	.	gene_id "PBfusion.107"; transcript_id "PBfusion.107.1";
GWHAAEP00000633	PacBio	exon	96013	96074	.	-	.	gene_id "PBfusion.107"; transcript_id "PBfusion.107.1";
GWHAAEP00000633	PacBio	exon	96408	96534	.	-	.	gene_id "PBfusion.107"; transcript_id "PBfusion.107.1";
GWHAAEP00000633	PacBio	exon	98005	98267	.	-	.	gene_id "PBfusion.107"; transcript_id "PBfusion.107.1";
GWHAAEP00000633	PacBio	exon	99226	99415	.	-	.	gene_id "PBfusion.107"; transcript_id "PBfusion.107.1";
GWHAAEP00000633	PacBio	exon	100179	100286	.	-	.	gene_id "PBfusion.107"; transcript_id "PBfusion.107.1";
GWHAAEP00000633	PacBio	exon	100479	100793	.	-	.	gene_id "PBfusion.107"; transcript_id "PBfusion.107.1";
GWHAAEP00000633	PacBio	exon	101281	101511	.	-	.	gene_id "PBfusion.107"; transcript_id "PBfusion.107.1";
GWHAAEP00000633	PacBio	exon	101600	101697	.	-	.	gene_id "PBfusion.107"; transcript_id "PBfusion.107.1";
GWHAAEP00000862	PacBio	transcript	144530	155103	.	-	.	gene_id "PBfusion.107"; transcript_id "PBfusion.107.2";
GWHAAEP00000862	PacBio	exon	144530	144762	.	-	.	gene_id "PBfusion.107"; transcript_id "PBfusion.107.2";
GWHAAEP00000862	PacBio	exon	145221	145346	.	-	.	gene_id "PBfusion.107"; transcript_id "PBfusion.107.2";
GWHAAEP00000862	PacBio	exon	145508	145579	.	-	.	gene_id "PBfusion.107"; transcript_id "PBfusion.107.2";
GWHAAEP00000862	PacBio	exon	145993	146075	.	-	.	gene_id "PBfusion.107"; transcript_id "PBfusion.107.2";
GWHAAEP00000862	PacBio	exon	146447	146538	.	-	.	gene_id "PBfusion.107"; transcript_id "PBfusion.107.2";
GWHAAEP00000862	PacBio	exon	147862	148276	.	-	.	gene_id "PBfusion.107"; transcript_id "PBfusion.107.2";
GWHAAEP00000862	PacBio	exon	149419	149480	.	-	.	gene_id "PBfusion.107"; transcript_id "PBfusion.107.2";
GWHAAEP00000862	PacBio	exon	149814	149940	.	-	.	gene_id "PBfusion.107"; transcript_id "PBfusion.107.2";
GWHAAEP00000862	PacBio	exon	151411	151673	.	-	.	gene_id "PBfusion.107"; transcript_id "PBfusion.107.2";
GWHAAEP00000862	PacBio	exon	152632	152821	.	-	.	gene_id "PBfusion.107"; transcript_id "PBfusion.107.2";
GWHAAEP00000862	PacBio	exon	153585	153692	.	-	.	gene_id "PBfusion.107"; transcript_id "PBfusion.107.2";
GWHAAEP00000862	PacBio	exon	153885	154199	.	-	.	gene_id "PBfusion.107"; transcript_id "PBfusion.107.2";
GWHAAEP00000862	PacBio	exon	154687	154917	.	-	.	gene_id "PBfusion.107"; transcript_id "PBfusion.107.2";
GWHAAEP00000862	PacBio	exon	155006	155103	.	-	.	gene_id "PBfusion.107"; transcript_id "PBfusion.107.2";
GWHAAEP00001464	PacBio	transcript	475071	479077	.	-	.	gene_id "PBfusion.106"; transcript_id "PBfusion.106.1";
GWHAAEP00001464	PacBio	exon	475071	475836	.	-	.	gene_id "PBfusion.106"; transcript_id "PBfusion.106.1";
GWHAAEP00001464	PacBio	exon	478055	478222	.	-	.	gene_id "PBfusion.106"; transcript_id "PBfusion.106.1";
GWHAAEP00001464	PacBio	exon	478913	479077	.	-	.	gene_id "PBfusion.106"; transcript_id "PBfusion.106.1";
GWHAAEP00009916	PacBio	transcript	5174	9180	.	-	.	gene_id "PBfusion.106"; transcript_id "PBfusion.106.2";
GWHAAEP00009916	PacBio	exon	5174	5939	.	-	.	gene_id "PBfusion.106"; transcript_id "PBfusion.106.2";
GWHAAEP00009916	PacBio	exon	8158	8325	.	-	.	gene_id "PBfusion.106"; transcript_id "PBfusion.106.2";
GWHAAEP00009916	PacBio	exon	9016	9180	.	-	.	gene_id "PBfusion.106"; transcript_id "PBfusion.106.2";
GWHAAEP00004235	PacBio	transcript	217549	218512	.	+	.	gene_id "PBfusion.109"; transcript_id "PBfusion.109.1";
GWHAAEP00004235	PacBio	exon	217549	218512	.	+	.	gene_id "PBfusion.109"; transcript_id "PBfusion.109.1";
GWHAAEP00009234	PacBio	transcript	260	1223	.	+	.	gene_id "PBfusion.109"; transcript_id "PBfusion.109.2";
GWHAAEP00009234	PacBio	exon	260	1223	.	+	.	gene_id "PBfusion.109"; transcript_id "PBfusion.109.2";
GWHAAEP00002881	PacBio	transcript	156771	160341	.	+	.	gene_id "PBfusion.108"; transcript_id "PBfusion.108.1";
GWHAAEP00002881	PacBio	exon	156771	156912	.	+	.	gene_id "PBfusion.108"; transcript_id "PBfusion.108.1";
GWHAAEP00002881	PacBio	exon	157095	160341	.	+	.	gene_id "PBfusion.108"; transcript_id "PBfusion.108.1";
GWHAAEP00003456	PacBio	transcript	2898	6468	.	-	.	gene_id "PBfusion.108"; transcript_id "PBfusion.108.2";
GWHAAEP00003456	PacBio	exon	2898	6144	.	-	.	gene_id "PBfusion.108"; transcript_id "PBfusion.108.2";
GWHAAEP00003456	PacBio	exon	6327	6468	.	-	.	gene_id "PBfusion.108"; transcript_id "PBfusion.108.2";
GWHAAEP00005210	PacBio	transcript	294180	297325	.	-	.	gene_id "PBfusion.82"; transcript_id "PBfusion.82.1";
GWHAAEP00005210	PacBio	exon	294180	297325	.	-	.	gene_id "PBfusion.82"; transcript_id "PBfusion.82.1";
GWHAAEP00005347	PacBio	transcript	35782	38927	.	+	.	gene_id "PBfusion.82"; transcript_id "PBfusion.82.2";
GWHAAEP00005347	PacBio	exon	35782	38927	.	+	.	gene_id "PBfusion.82"; transcript_id "PBfusion.82.2";
GWHAAEP00001464	PacBio	transcript	476544	479019	.	-	.	gene_id "PBfusion.127"; transcript_id "PBfusion.127.1";
GWHAAEP00001464	PacBio	exon	476544	479019	.	-	.	gene_id "PBfusion.127"; transcript_id "PBfusion.127.1";
GWHAAEP00009916	PacBio	transcript	6647	9122	.	-	.	gene_id "PBfusion.127"; transcript_id "PBfusion.127.2";
GWHAAEP00009916	PacBio	exon	6647	9122	.	-	.	gene_id "PBfusion.127"; transcript_id "PBfusion.127.2";
GWHAAEP00000633	PacBio	transcript	80013	85689	.	+	.	gene_id "PBfusion.49"; transcript_id "PBfusion.49.1";
GWHAAEP00000633	PacBio	exon	80013	80151	.	+	.	gene_id "PBfusion.49"; transcript_id "PBfusion.49.1";
GWHAAEP00000633	PacBio	exon	80279	80699	.	+	.	gene_id "PBfusion.49"; transcript_id "PBfusion.49.1";
GWHAAEP00000633	PacBio	exon	81022	81306	.	+	.	gene_id "PBfusion.49"; transcript_id "PBfusion.49.1";
GWHAAEP00000633	PacBio	exon	81408	81725	.	+	.	gene_id "PBfusion.49"; transcript_id "PBfusion.49.1";
GWHAAEP00000633	PacBio	exon	82244	82471	.	+	.	gene_id "PBfusion.49"; transcript_id "PBfusion.49.1";
GWHAAEP00000633	PacBio	exon	83576	83676	.	+	.	gene_id "PBfusion.49"; transcript_id "PBfusion.49.1";
GWHAAEP00000633	PacBio	exon	84321	84438	.	+	.	gene_id "PBfusion.49"; transcript_id "PBfusion.49.1";
GWHAAEP00000633	PacBio	exon	85121	85689	.	+	.	gene_id "PBfusion.49"; transcript_id "PBfusion.49.1";
GWHAAEP00000862	PacBio	transcript	133419	139095	.	+	.	gene_id "PBfusion.49"; transcript_id "PBfusion.49.2";
GWHAAEP00000862	PacBio	exon	133419	133557	.	+	.	gene_id "PBfusion.49"; transcript_id "PBfusion.49.2";
GWHAAEP00000862	PacBio	exon	133685	134105	.	+	.	gene_id "PBfusion.49"; transcript_id "PBfusion.49.2";
GWHAAEP00000862	PacBio	exon	134428	134712	.	+	.	gene_id "PBfusion.49"; transcript_id "PBfusion.49.2";
GWHAAEP00000862	PacBio	exon	134814	135131	.	+	.	gene_id "PBfusion.49"; transcript_id "PBfusion.49.2";
GWHAAEP00000862	PacBio	exon	135650	135877	.	+	.	gene_id "PBfusion.49"; transcript_id "PBfusion.49.2";
GWHAAEP00000862	PacBio	exon	136982	137082	.	+	.	gene_id "PBfusion.49"; transcript_id "PBfusion.49.2";
GWHAAEP00000862	PacBio	exon	137727	137844	.	+	.	gene_id "PBfusion.49"; transcript_id "PBfusion.49.2";
GWHAAEP00000862	PacBio	exon	138527	139095	.	+	.	gene_id "PBfusion.49"; transcript_id "PBfusion.49.2";
GWHAAEP00002461	PacBio	transcript	952933	961285	.	-	.	gene_id "PBfusion.48"; transcript_id "PBfusion.48.1";
GWHAAEP00002461	PacBio	exon	952933	953507	.	-	.	gene_id "PBfusion.48"; transcript_id "PBfusion.48.1";
GWHAAEP00002461	PacBio	exon	954860	955364	.	-	.	gene_id "PBfusion.48"; transcript_id "PBfusion.48.1";
GWHAAEP00002461	PacBio	exon	957997	958167	.	-	.	gene_id "PBfusion.48"; transcript_id "PBfusion.48.1";
GWHAAEP00002461	PacBio	exon	958309	958473	.	-	.	gene_id "PBfusion.48"; transcript_id "PBfusion.48.1";
GWHAAEP00002461	PacBio	exon	958673	959179	.	-	.	gene_id "PBfusion.48"; transcript_id "PBfusion.48.1";
GWHAAEP00002461	PacBio	exon	959532	959699	.	-	.	gene_id "PBfusion.48"; transcript_id "PBfusion.48.1";
GWHAAEP00002461	PacBio	exon	959961	960110	.	-	.	gene_id "PBfusion.48"; transcript_id "PBfusion.48.1";
GWHAAEP00002461	PacBio	exon	960860	961285	.	-	.	gene_id "PBfusion.48"; transcript_id "PBfusion.48.1";
GWHAAEP00006596	PacBio	transcript	222951	231303	.	-	.	gene_id "PBfusion.48"; transcript_id "PBfusion.48.2";
GWHAAEP00006596	PacBio	exon	222951	223525	.	-	.	gene_id "PBfusion.48"; transcript_id "PBfusion.48.2";
GWHAAEP00006596	PacBio	exon	224878	225382	.	-	.	gene_id "PBfusion.48"; transcript_id "PBfusion.48.2";
GWHAAEP00006596	PacBio	exon	228015	228185	.	-	.	gene_id "PBfusion.48"; transcript_id "PBfusion.48.2";
GWHAAEP00006596	PacBio	exon	228327	228491	.	-	.	gene_id "PBfusion.48"; transcript_id "PBfusion.48.2";
GWHAAEP00006596	PacBio	exon	228691	229197	.	-	.	gene_id "PBfusion.48"; transcript_id "PBfusion.48.2";
GWHAAEP00006596	PacBio	exon	229550	229717	.	-	.	gene_id "PBfusion.48"; transcript_id "PBfusion.48.2";
GWHAAEP00006596	PacBio	exon	229979	230128	.	-	.	gene_id "PBfusion.48"; transcript_id "PBfusion.48.2";
GWHAAEP00006596	PacBio	exon	230878	231303	.	-	.	gene_id "PBfusion.48"; transcript_id "PBfusion.48.2";
GWHAAEP00002537	PacBio	transcript	259164	260837	.	+	.	gene_id "PBfusion.43"; transcript_id "PBfusion.43.1";
GWHAAEP00002537	PacBio	exon	259164	259486	.	+	.	gene_id "PBfusion.43"; transcript_id "PBfusion.43.1";
GWHAAEP00002537	PacBio	exon	259618	259810	.	+	.	gene_id "PBfusion.43"; transcript_id "PBfusion.43.1";
GWHAAEP00002537	PacBio	exon	259881	260164	.	+	.	gene_id "PBfusion.43"; transcript_id "PBfusion.43.1";
GWHAAEP00002537	PacBio	exon	260281	260338	.	+	.	gene_id "PBfusion.43"; transcript_id "PBfusion.43.1";
GWHAAEP00002537	PacBio	exon	260478	260837	.	+	.	gene_id "PBfusion.43"; transcript_id "PBfusion.43.1";
GWHAAEP00010348	PacBio	transcript	2513	4186	.	-	.	gene_id "PBfusion.43"; transcript_id "PBfusion.43.2";
GWHAAEP00010348	PacBio	exon	2513	2872	.	-	.	gene_id "PBfusion.43"; transcript_id "PBfusion.43.2";
GWHAAEP00010348	PacBio	exon	3012	3069	.	-	.	gene_id "PBfusion.43"; transcript_id "PBfusion.43.2";
GWHAAEP00010348	PacBio	exon	3186	3469	.	-	.	gene_id "PBfusion.43"; transcript_id "PBfusion.43.2";
GWHAAEP00010348	PacBio	exon	3540	3732	.	-	.	gene_id "PBfusion.43"; transcript_id "PBfusion.43.2";
GWHAAEP00010348	PacBio	exon	3864	4186	.	-	.	gene_id "PBfusion.43"; transcript_id "PBfusion.43.2";
GWHAAEP00000633	PacBio	transcript	192495	195375	.	+	.	gene_id "PBfusion.42"; transcript_id "PBfusion.42.1";
GWHAAEP00000633	PacBio	exon	192495	192684	.	+	.	gene_id "PBfusion.42"; transcript_id "PBfusion.42.1";
GWHAAEP00000633	PacBio	exon	192798	193443	.	+	.	gene_id "PBfusion.42"; transcript_id "PBfusion.42.1";
GWHAAEP00000633	PacBio	exon	194094	194263	.	+	.	gene_id "PBfusion.42"; transcript_id "PBfusion.42.1";
GWHAAEP00000633	PacBio	exon	194359	195375	.	+	.	gene_id "PBfusion.42"; transcript_id "PBfusion.42.1";
GWHAAEP00000862	PacBio	transcript	245901	248781	.	+	.	gene_id "PBfusion.42"; transcript_id "PBfusion.42.2";
GWHAAEP00000862	PacBio	exon	245901	246090	.	+	.	gene_id "PBfusion.42"; transcript_id "PBfusion.42.2";
GWHAAEP00000862	PacBio	exon	246204	246849	.	+	.	gene_id "PBfusion.42"; transcript_id "PBfusion.42.2";
GWHAAEP00000862	PacBio	exon	247500	247669	.	+	.	gene_id "PBfusion.42"; transcript_id "PBfusion.42.2";
GWHAAEP00000862	PacBio	exon	247765	248781	.	+	.	gene_id "PBfusion.42"; transcript_id "PBfusion.42.2";
GWHAAEP00005363	PacBio	transcript	41026	44389	.	+	.	gene_id "PBfusion.41"; transcript_id "PBfusion.41.1";
GWHAAEP00005363	PacBio	exon	41026	41674	.	+	.	gene_id "PBfusion.41"; transcript_id "PBfusion.41.1";
GWHAAEP00005363	PacBio	exon	42277	42413	.	+	.	gene_id "PBfusion.41"; transcript_id "PBfusion.41.1";
GWHAAEP00005363	PacBio	exon	42543	43195	.	+	.	gene_id "PBfusion.41"; transcript_id "PBfusion.41.1";
GWHAAEP00005363	PacBio	exon	43956	44389	.	+	.	gene_id "PBfusion.41"; transcript_id "PBfusion.41.1";
GWHAAEP00013906	PacBio	transcript	14142	17505	.	-	.	gene_id "PBfusion.41"; transcript_id "PBfusion.41.2";
GWHAAEP00013906	PacBio	exon	14142	14575	.	-	.	gene_id "PBfusion.41"; transcript_id "PBfusion.41.2";
GWHAAEP00013906	PacBio	exon	15336	15988	.	-	.	gene_id "PBfusion.41"; transcript_id "PBfusion.41.2";
GWHAAEP00013906	PacBio	exon	16118	16254	.	-	.	gene_id "PBfusion.41"; transcript_id "PBfusion.41.2";
GWHAAEP00013906	PacBio	exon	16857	17505	.	-	.	gene_id "PBfusion.41"; transcript_id "PBfusion.41.2";
GWHAAEP00000590	PacBio	transcript	119579	123615	.	+	.	gene_id "PBfusion.40"; transcript_id "PBfusion.40.1";
GWHAAEP00000590	PacBio	exon	119579	120559	.	+	.	gene_id "PBfusion.40"; transcript_id "PBfusion.40.1";
GWHAAEP00000590	PacBio	exon	120773	120841	.	+	.	gene_id "PBfusion.40"; transcript_id "PBfusion.40.1";
GWHAAEP00000590	PacBio	exon	120972	121054	.	+	.	gene_id "PBfusion.40"; transcript_id "PBfusion.40.1";
GWHAAEP00000590	PacBio	exon	121726	121778	.	+	.	gene_id "PBfusion.40"; transcript_id "PBfusion.40.1";
GWHAAEP00000590	PacBio	exon	121888	122012	.	+	.	gene_id "PBfusion.40"; transcript_id "PBfusion.40.1";
GWHAAEP00000590	PacBio	exon	122119	122569	.	+	.	gene_id "PBfusion.40"; transcript_id "PBfusion.40.1";
GWHAAEP00000590	PacBio	exon	122654	122744	.	+	.	gene_id "PBfusion.40"; transcript_id "PBfusion.40.1";
GWHAAEP00000590	PacBio	exon	123009	123615	.	+	.	gene_id "PBfusion.40"; transcript_id "PBfusion.40.1";
GWHAAEP00002135	PacBio	transcript	31143	35179	.	-	.	gene_id "PBfusion.40"; transcript_id "PBfusion.40.2";
GWHAAEP00002135	PacBio	exon	31143	31749	.	-	.	gene_id "PBfusion.40"; transcript_id "PBfusion.40.2";
GWHAAEP00002135	PacBio	exon	32014	32104	.	-	.	gene_id "PBfusion.40"; transcript_id "PBfusion.40.2";
GWHAAEP00002135	PacBio	exon	32189	32639	.	-	.	gene_id "PBfusion.40"; transcript_id "PBfusion.40.2";
GWHAAEP00002135	PacBio	exon	32746	32870	.	-	.	gene_id "PBfusion.40"; transcript_id "PBfusion.40.2";
GWHAAEP00002135	PacBio	exon	32980	33032	.	-	.	gene_id "PBfusion.40"; transcript_id "PBfusion.40.2";
GWHAAEP00002135	PacBio	exon	33704	33786	.	-	.	gene_id "PBfusion.40"; transcript_id "PBfusion.40.2";
GWHAAEP00002135	PacBio	exon	33917	33985	.	-	.	gene_id "PBfusion.40"; transcript_id "PBfusion.40.2";
GWHAAEP00002135	PacBio	exon	34199	35179	.	-	.	gene_id "PBfusion.40"; transcript_id "PBfusion.40.2";
GWHAAEP00002113	PacBio	transcript	23045	24656	.	-	.	gene_id "PBfusion.47"; transcript_id "PBfusion.47.1";
GWHAAEP00002113	PacBio	exon	23045	24031	.	-	.	gene_id "PBfusion.47"; transcript_id "PBfusion.47.1";
GWHAAEP00002113	PacBio	exon	24310	24380	.	-	.	gene_id "PBfusion.47"; transcript_id "PBfusion.47.1";
GWHAAEP00002113	PacBio	exon	24524	24656	.	-	.	gene_id "PBfusion.47"; transcript_id "PBfusion.47.1";
GWHAAEP00007138	PacBio	transcript	369969	371580	.	-	.	gene_id "PBfusion.47"; transcript_id "PBfusion.47.2";
GWHAAEP00007138	PacBio	exon	369969	370955	.	-	.	gene_id "PBfusion.47"; transcript_id "PBfusion.47.2";
GWHAAEP00007138	PacBio	exon	371234	371304	.	-	.	gene_id "PBfusion.47"; transcript_id "PBfusion.47.2";
GWHAAEP00007138	PacBio	exon	371448	371580	.	-	.	gene_id "PBfusion.47"; transcript_id "PBfusion.47.2";
GWHAAEP00001410	PacBio	transcript	240263	241502	.	-	.	gene_id "PBfusion.46"; transcript_id "PBfusion.46.1";
GWHAAEP00001410	PacBio	exon	240263	241502	.	-	.	gene_id "PBfusion.46"; transcript_id "PBfusion.46.1";
GWHAAEP00010694	PacBio	transcript	1400	2639	.	+	.	gene_id "PBfusion.46"; transcript_id "PBfusion.46.2";
GWHAAEP00010694	PacBio	exon	1400	2639	.	+	.	gene_id "PBfusion.46"; transcript_id "PBfusion.46.2";
GWHAAEP00001429	PacBio	transcript	210801	216225	.	+	.	gene_id "PBfusion.45"; transcript_id "PBfusion.45.1";
GWHAAEP00001429	PacBio	exon	210801	211130	.	+	.	gene_id "PBfusion.45"; transcript_id "PBfusion.45.1";
GWHAAEP00001429	PacBio	exon	211419	214113	.	+	.	gene_id "PBfusion.45"; transcript_id "PBfusion.45.1";
GWHAAEP00001429	PacBio	exon	215016	215198	.	+	.	gene_id "PBfusion.45"; transcript_id "PBfusion.45.1";
GWHAAEP00001429	PacBio	exon	216057	216225	.	+	.	gene_id "PBfusion.45"; transcript_id "PBfusion.45.1";
GWHAAEP00010803	PacBio	transcript	2970	8394	.	+	.	gene_id "PBfusion.45"; transcript_id "PBfusion.45.2";
GWHAAEP00010803	PacBio	exon	2970	3299	.	+	.	gene_id "PBfusion.45"; transcript_id "PBfusion.45.2";
GWHAAEP00010803	PacBio	exon	3588	6282	.	+	.	gene_id "PBfusion.45"; transcript_id "PBfusion.45.2";
GWHAAEP00010803	PacBio	exon	7185	7367	.	+	.	gene_id "PBfusion.45"; transcript_id "PBfusion.45.2";
GWHAAEP00010803	PacBio	exon	8226	8394	.	+	.	gene_id "PBfusion.45"; transcript_id "PBfusion.45.2";
GWHAAEP00000633	PacBio	transcript	7234	16595	.	-	.	gene_id "PBfusion.44"; transcript_id "PBfusion.44.1";
GWHAAEP00000633	PacBio	exon	7234	7985	.	-	.	gene_id "PBfusion.44"; transcript_id "PBfusion.44.1";
GWHAAEP00000633	PacBio	exon	8109	8194	.	-	.	gene_id "PBfusion.44"; transcript_id "PBfusion.44.1";
GWHAAEP00000633	PacBio	exon	8646	8759	.	-	.	gene_id "PBfusion.44"; transcript_id "PBfusion.44.1";
GWHAAEP00000633	PacBio	exon	10179	10548	.	-	.	gene_id "PBfusion.44"; transcript_id "PBfusion.44.1";
GWHAAEP00000633	PacBio	exon	11322	11455	.	-	.	gene_id "PBfusion.44"; transcript_id "PBfusion.44.1";
GWHAAEP00000633	PacBio	exon	12622	12730	.	-	.	gene_id "PBfusion.44"; transcript_id "PBfusion.44.1";
GWHAAEP00000633	PacBio	exon	13533	13654	.	-	.	gene_id "PBfusion.44"; transcript_id "PBfusion.44.1";
GWHAAEP00000633	PacBio	exon	14165	14271	.	-	.	gene_id "PBfusion.44"; transcript_id "PBfusion.44.1";
GWHAAEP00000633	PacBio	exon	14647	14751	.	-	.	gene_id "PBfusion.44"; transcript_id "PBfusion.44.1";
GWHAAEP00000633	PacBio	exon	14850	15008	.	-	.	gene_id "PBfusion.44"; transcript_id "PBfusion.44.1";
GWHAAEP00000633	PacBio	exon	15404	15434	.	-	.	gene_id "PBfusion.44"; transcript_id "PBfusion.44.1";
GWHAAEP00000633	PacBio	exon	15804	16053	.	-	.	gene_id "PBfusion.44"; transcript_id "PBfusion.44.1";
GWHAAEP00000633	PacBio	exon	16191	16595	.	-	.	gene_id "PBfusion.44"; transcript_id "PBfusion.44.1";
GWHAAEP00000862	PacBio	transcript	60640	70001	.	-	.	gene_id "PBfusion.44"; transcript_id "PBfusion.44.2";
GWHAAEP00000862	PacBio	exon	60640	61391	.	-	.	gene_id "PBfusion.44"; transcript_id "PBfusion.44.2";
GWHAAEP00000862	PacBio	exon	61515	61600	.	-	.	gene_id "PBfusion.44"; transcript_id "PBfusion.44.2";
GWHAAEP00000862	PacBio	exon	62052	62165	.	-	.	gene_id "PBfusion.44"; transcript_id "PBfusion.44.2";
GWHAAEP00000862	PacBio	exon	63585	63954	.	-	.	gene_id "PBfusion.44"; transcript_id "PBfusion.44.2";
GWHAAEP00000862	PacBio	exon	64728	64861	.	-	.	gene_id "PBfusion.44"; transcript_id "PBfusion.44.2";
GWHAAEP00000862	PacBio	exon	66028	66136	.	-	.	gene_id "PBfusion.44"; transcript_id "PBfusion.44.2";
GWHAAEP00000862	PacBio	exon	66939	67060	.	-	.	gene_id "PBfusion.44"; transcript_id "PBfusion.44.2";
GWHAAEP00000862	PacBio	exon	67571	67677	.	-	.	gene_id "PBfusion.44"; transcript_id "PBfusion.44.2";
GWHAAEP00000862	PacBio	exon	68053	68157	.	-	.	gene_id "PBfusion.44"; transcript_id "PBfusion.44.2";
GWHAAEP00000862	PacBio	exon	68256	68414	.	-	.	gene_id "PBfusion.44"; transcript_id "PBfusion.44.2";
GWHAAEP00000862	PacBio	exon	68810	68840	.	-	.	gene_id "PBfusion.44"; transcript_id "PBfusion.44.2";
GWHAAEP00000862	PacBio	exon	69210	69459	.	-	.	gene_id "PBfusion.44"; transcript_id "PBfusion.44.2";
GWHAAEP00000862	PacBio	exon	69597	70001	.	-	.	gene_id "PBfusion.44"; transcript_id "PBfusion.44.2";
GWHAAEP00002461	PacBio	transcript	811522	830223	.	+	.	gene_id "PBfusion.174"; transcript_id "PBfusion.174.1";
GWHAAEP00002461	PacBio	exon	811522	811730	.	+	.	gene_id "PBfusion.174"; transcript_id "PBfusion.174.1";
GWHAAEP00002461	PacBio	exon	811818	811911	.	+	.	gene_id "PBfusion.174"; transcript_id "PBfusion.174.1";
GWHAAEP00002461	PacBio	exon	812210	812411	.	+	.	gene_id "PBfusion.174"; transcript_id "PBfusion.174.1";
GWHAAEP00002461	PacBio	exon	812666	812807	.	+	.	gene_id "PBfusion.174"; transcript_id "PBfusion.174.1";
GWHAAEP00002461	PacBio	exon	812933	813033	.	+	.	gene_id "PBfusion.174"; transcript_id "PBfusion.174.1";
GWHAAEP00002461	PacBio	exon	813488	813551	.	+	.	gene_id "PBfusion.174"; transcript_id "PBfusion.174.1";
GWHAAEP00002461	PacBio	exon	813774	813887	.	+	.	gene_id "PBfusion.174"; transcript_id "PBfusion.174.1";
GWHAAEP00002461	PacBio	exon	815423	815643	.	+	.	gene_id "PBfusion.174"; transcript_id "PBfusion.174.1";
GWHAAEP00002461	PacBio	exon	816528	816582	.	+	.	gene_id "PBfusion.174"; transcript_id "PBfusion.174.1";
GWHAAEP00002461	PacBio	exon	816683	816766	.	+	.	gene_id "PBfusion.174"; transcript_id "PBfusion.174.1";
GWHAAEP00002461	PacBio	exon	816901	817096	.	+	.	gene_id "PBfusion.174"; transcript_id "PBfusion.174.1";
GWHAAEP00002461	PacBio	exon	817211	817337	.	+	.	gene_id "PBfusion.174"; transcript_id "PBfusion.174.1";
GWHAAEP00002461	PacBio	exon	817449	817500	.	+	.	gene_id "PBfusion.174"; transcript_id "PBfusion.174.1";
GWHAAEP00002461	PacBio	exon	817589	817633	.	+	.	gene_id "PBfusion.174"; transcript_id "PBfusion.174.1";
GWHAAEP00002461	PacBio	exon	818413	818488	.	+	.	gene_id "PBfusion.174"; transcript_id "PBfusion.174.1";
GWHAAEP00002461	PacBio	exon	818628	818701	.	+	.	gene_id "PBfusion.174"; transcript_id "PBfusion.174.1";
GWHAAEP00002461	PacBio	exon	818782	818832	.	+	.	gene_id "PBfusion.174"; transcript_id "PBfusion.174.1";
GWHAAEP00002461	PacBio	exon	819122	819279	.	+	.	gene_id "PBfusion.174"; transcript_id "PBfusion.174.1";
GWHAAEP00002461	PacBio	exon	819556	819603	.	+	.	gene_id "PBfusion.174"; transcript_id "PBfusion.174.1";
GWHAAEP00002461	PacBio	exon	820135	820192	.	+	.	gene_id "PBfusion.174"; transcript_id "PBfusion.174.1";
GWHAAEP00002461	PacBio	exon	820285	820368	.	+	.	gene_id "PBfusion.174"; transcript_id "PBfusion.174.1";
GWHAAEP00002461	PacBio	exon	821874	822129	.	+	.	gene_id "PBfusion.174"; transcript_id "PBfusion.174.1";
GWHAAEP00002461	PacBio	exon	822238	822434	.	+	.	gene_id "PBfusion.174"; transcript_id "PBfusion.174.1";
GWHAAEP00002461	PacBio	exon	822794	822858	.	+	.	gene_id "PBfusion.174"; transcript_id "PBfusion.174.1";
GWHAAEP00002461	PacBio	exon	822965	823088	.	+	.	gene_id "PBfusion.174"; transcript_id "PBfusion.174.1";
GWHAAEP00002461	PacBio	exon	825570	825751	.	+	.	gene_id "PBfusion.174"; transcript_id "PBfusion.174.1";
GWHAAEP00002461	PacBio	exon	825852	825923	.	+	.	gene_id "PBfusion.174"; transcript_id "PBfusion.174.1";
GWHAAEP00002461	PacBio	exon	826009	826169	.	+	.	gene_id "PBfusion.174"; transcript_id "PBfusion.174.1";
GWHAAEP00002461	PacBio	exon	826365	826406	.	+	.	gene_id "PBfusion.174"; transcript_id "PBfusion.174.1";
GWHAAEP00002461	PacBio	exon	827379	827587	.	+	.	gene_id "PBfusion.174"; transcript_id "PBfusion.174.1";
GWHAAEP00002461	PacBio	exon	829763	830223	.	+	.	gene_id "PBfusion.174"; transcript_id "PBfusion.174.1";
GWHAAEP00006596	PacBio	transcript	81548	100249	.	+	.	gene_id "PBfusion.174"; transcript_id "PBfusion.174.2";
GWHAAEP00006596	PacBio	exon	81548	81756	.	+	.	gene_id "PBfusion.174"; transcript_id "PBfusion.174.2";
GWHAAEP00006596	PacBio	exon	81844	81937	.	+	.	gene_id "PBfusion.174"; transcript_id "PBfusion.174.2";
GWHAAEP00006596	PacBio	exon	82236	82437	.	+	.	gene_id "PBfusion.174"; transcript_id "PBfusion.174.2";
GWHAAEP00006596	PacBio	exon	82692	82833	.	+	.	gene_id "PBfusion.174"; transcript_id "PBfusion.174.2";
GWHAAEP00006596	PacBio	exon	82959	83059	.	+	.	gene_id "PBfusion.174"; transcript_id "PBfusion.174.2";
GWHAAEP00006596	PacBio	exon	83514	83577	.	+	.	gene_id "PBfusion.174"; transcript_id "PBfusion.174.2";
GWHAAEP00006596	PacBio	exon	83800	83913	.	+	.	gene_id "PBfusion.174"; transcript_id "PBfusion.174.2";
GWHAAEP00006596	PacBio	exon	85449	85669	.	+	.	gene_id "PBfusion.174"; transcript_id "PBfusion.174.2";
GWHAAEP00006596	PacBio	exon	86554	86608	.	+	.	gene_id "PBfusion.174"; transcript_id "PBfusion.174.2";
GWHAAEP00006596	PacBio	exon	86709	86792	.	+	.	gene_id "PBfusion.174"; transcript_id "PBfusion.174.2";
GWHAAEP00006596	PacBio	exon	86927	87122	.	+	.	gene_id "PBfusion.174"; transcript_id "PBfusion.174.2";
GWHAAEP00006596	PacBio	exon	87237	87363	.	+	.	gene_id "PBfusion.174"; transcript_id "PBfusion.174.2";
GWHAAEP00006596	PacBio	exon	87475	87526	.	+	.	gene_id "PBfusion.174"; transcript_id "PBfusion.174.2";
GWHAAEP00006596	PacBio	exon	87615	87659	.	+	.	gene_id "PBfusion.174"; transcript_id "PBfusion.174.2";
GWHAAEP00006596	PacBio	exon	88439	88514	.	+	.	gene_id "PBfusion.174"; transcript_id "PBfusion.174.2";
GWHAAEP00006596	PacBio	exon	88654	88727	.	+	.	gene_id "PBfusion.174"; transcript_id "PBfusion.174.2";
GWHAAEP00006596	PacBio	exon	88808	88858	.	+	.	gene_id "PBfusion.174"; transcript_id "PBfusion.174.2";
GWHAAEP00006596	PacBio	exon	89148	89305	.	+	.	gene_id "PBfusion.174"; transcript_id "PBfusion.174.2";
GWHAAEP00006596	PacBio	exon	89582	89629	.	+	.	gene_id "PBfusion.174"; transcript_id "PBfusion.174.2";
GWHAAEP00006596	PacBio	exon	90161	90218	.	+	.	gene_id "PBfusion.174"; transcript_id "PBfusion.174.2";
GWHAAEP00006596	PacBio	exon	90311	90394	.	+	.	gene_id "PBfusion.174"; transcript_id "PBfusion.174.2";
GWHAAEP00006596	PacBio	exon	91900	92155	.	+	.	gene_id "PBfusion.174"; transcript_id "PBfusion.174.2";
GWHAAEP00006596	PacBio	exon	92264	92460	.	+	.	gene_id "PBfusion.174"; transcript_id "PBfusion.174.2";
GWHAAEP00006596	PacBio	exon	92820	92884	.	+	.	gene_id "PBfusion.174"; transcript_id "PBfusion.174.2";
GWHAAEP00006596	PacBio	exon	92991	93114	.	+	.	gene_id "PBfusion.174"; transcript_id "PBfusion.174.2";
GWHAAEP00006596	PacBio	exon	95596	95777	.	+	.	gene_id "PBfusion.174"; transcript_id "PBfusion.174.2";
GWHAAEP00006596	PacBio	exon	95878	95949	.	+	.	gene_id "PBfusion.174"; transcript_id "PBfusion.174.2";
GWHAAEP00006596	PacBio	exon	96035	96195	.	+	.	gene_id "PBfusion.174"; transcript_id "PBfusion.174.2";
GWHAAEP00006596	PacBio	exon	96391	96432	.	+	.	gene_id "PBfusion.174"; transcript_id "PBfusion.174.2";
GWHAAEP00006596	PacBio	exon	97405	97613	.	+	.	gene_id "PBfusion.174"; transcript_id "PBfusion.174.2";
GWHAAEP00006596	PacBio	exon	99789	100249	.	+	.	gene_id "PBfusion.174"; transcript_id "PBfusion.174.2";
GWHAAEP00000633	PacBio	transcript	7688	17360	.	-	.	gene_id "PBfusion.170"; transcript_id "PBfusion.170.1";
GWHAAEP00000633	PacBio	exon	7688	7985	.	-	.	gene_id "PBfusion.170"; transcript_id "PBfusion.170.1";
GWHAAEP00000633	PacBio	exon	8109	8194	.	-	.	gene_id "PBfusion.170"; transcript_id "PBfusion.170.1";
GWHAAEP00000633	PacBio	exon	8646	8759	.	-	.	gene_id "PBfusion.170"; transcript_id "PBfusion.170.1";
GWHAAEP00000633	PacBio	exon	10179	10548	.	-	.	gene_id "PBfusion.170"; transcript_id "PBfusion.170.1";
GWHAAEP00000633	PacBio	exon	11322	11455	.	-	.	gene_id "PBfusion.170"; transcript_id "PBfusion.170.1";
GWHAAEP00000633	PacBio	exon	12622	12730	.	-	.	gene_id "PBfusion.170"; transcript_id "PBfusion.170.1";
GWHAAEP00000633	PacBio	exon	13533	14271	.	-	.	gene_id "PBfusion.170"; transcript_id "PBfusion.170.1";
GWHAAEP00000633	PacBio	exon	14647	14751	.	-	.	gene_id "PBfusion.170"; transcript_id "PBfusion.170.1";
GWHAAEP00000633	PacBio	exon	14850	15008	.	-	.	gene_id "PBfusion.170"; transcript_id "PBfusion.170.1";
GWHAAEP00000633	PacBio	exon	15379	16053	.	-	.	gene_id "PBfusion.170"; transcript_id "PBfusion.170.1";
GWHAAEP00000633	PacBio	exon	16274	17360	.	-	.	gene_id "PBfusion.170"; transcript_id "PBfusion.170.1";
GWHAAEP00000862	PacBio	transcript	61094	70766	.	-	.	gene_id "PBfusion.170"; transcript_id "PBfusion.170.2";
GWHAAEP00000862	PacBio	exon	61094	61391	.	-	.	gene_id "PBfusion.170"; transcript_id "PBfusion.170.2";
GWHAAEP00000862	PacBio	exon	61515	61600	.	-	.	gene_id "PBfusion.170"; transcript_id "PBfusion.170.2";
GWHAAEP00000862	PacBio	exon	62052	62165	.	-	.	gene_id "PBfusion.170"; transcript_id "PBfusion.170.2";
GWHAAEP00000862	PacBio	exon	63585	63954	.	-	.	gene_id "PBfusion.170"; transcript_id "PBfusion.170.2";
GWHAAEP00000862	PacBio	exon	64728	64861	.	-	.	gene_id "PBfusion.170"; transcript_id "PBfusion.170.2";
GWHAAEP00000862	PacBio	exon	66028	66136	.	-	.	gene_id "PBfusion.170"; transcript_id "PBfusion.170.2";
GWHAAEP00000862	PacBio	exon	66939	67677	.	-	.	gene_id "PBfusion.170"; transcript_id "PBfusion.170.2";
GWHAAEP00000862	PacBio	exon	68053	68157	.	-	.	gene_id "PBfusion.170"; transcript_id "PBfusion.170.2";
GWHAAEP00000862	PacBio	exon	68256	68414	.	-	.	gene_id "PBfusion.170"; transcript_id "PBfusion.170.2";
GWHAAEP00000862	PacBio	exon	68785	69459	.	-	.	gene_id "PBfusion.170"; transcript_id "PBfusion.170.2";
GWHAAEP00000862	PacBio	exon	69680	70766	.	-	.	gene_id "PBfusion.170"; transcript_id "PBfusion.170.2";
GWHAAEP00000206	PacBio	transcript	788240	790246	.	-	.	gene_id "PBfusion.171"; transcript_id "PBfusion.171.1";
GWHAAEP00000206	PacBio	exon	788240	788495	.	-	.	gene_id "PBfusion.171"; transcript_id "PBfusion.171.1";
GWHAAEP00000206	PacBio	exon	789507	790246	.	-	.	gene_id "PBfusion.171"; transcript_id "PBfusion.171.1";
GWHAAEP00013855	PacBio	transcript	118176	120182	.	-	.	gene_id "PBfusion.171"; transcript_id "PBfusion.171.2";
GWHAAEP00013855	PacBio	exon	118176	118431	.	-	.	gene_id "PBfusion.171"; transcript_id "PBfusion.171.2";
GWHAAEP00013855	PacBio	exon	119443	120182	.	-	.	gene_id "PBfusion.171"; transcript_id "PBfusion.171.2";
GWHAAEP00001879	PacBio	transcript	100359	102385	.	+	.	gene_id "PBfusion.172"; transcript_id "PBfusion.172.1";
GWHAAEP00001879	PacBio	exon	100359	100395	.	+	.	gene_id "PBfusion.172"; transcript_id "PBfusion.172.1";
GWHAAEP00001879	PacBio	exon	100503	101375	.	+	.	gene_id "PBfusion.172"; transcript_id "PBfusion.172.1";
GWHAAEP00001879	PacBio	exon	101469	101501	.	+	.	gene_id "PBfusion.172"; transcript_id "PBfusion.172.1";
GWHAAEP00001879	PacBio	exon	101583	101663	.	+	.	gene_id "PBfusion.172"; transcript_id "PBfusion.172.1";
GWHAAEP00001879	PacBio	exon	101943	102002	.	+	.	gene_id "PBfusion.172"; transcript_id "PBfusion.172.1";
GWHAAEP00001879	PacBio	exon	102078	102385	.	+	.	gene_id "PBfusion.172"; transcript_id "PBfusion.172.1";
GWHAAEP00015574	PacBio	transcript	623	2645	.	+	.	gene_id "PBfusion.172"; transcript_id "PBfusion.172.2";
GWHAAEP00015574	PacBio	exon	623	659	.	+	.	gene_id "PBfusion.172"; transcript_id "PBfusion.172.2";
GWHAAEP00015574	PacBio	exon	767	1639	.	+	.	gene_id "PBfusion.172"; transcript_id "PBfusion.172.2";
GWHAAEP00015574	PacBio	exon	1729	1761	.	+	.	gene_id "PBfusion.172"; transcript_id "PBfusion.172.2";
GWHAAEP00015574	PacBio	exon	1843	1923	.	+	.	gene_id "PBfusion.172"; transcript_id "PBfusion.172.2";
GWHAAEP00015574	PacBio	exon	2203	2262	.	+	.	gene_id "PBfusion.172"; transcript_id "PBfusion.172.2";
GWHAAEP00015574	PacBio	exon	2338	2645	.	+	.	gene_id "PBfusion.172"; transcript_id "PBfusion.172.2";
GWHAAEP00001464	PacBio	transcript	475135	476442	.	-	.	gene_id "PBfusion.173"; transcript_id "PBfusion.173.1";
GWHAAEP00001464	PacBio	exon	475135	475836	.	-	.	gene_id "PBfusion.173"; transcript_id "PBfusion.173.1";
GWHAAEP00001464	PacBio	exon	476103	476442	.	-	.	gene_id "PBfusion.173"; transcript_id "PBfusion.173.1";
GWHAAEP00009916	PacBio	transcript	5238	6545	.	-	.	gene_id "PBfusion.173"; transcript_id "PBfusion.173.2";
GWHAAEP00009916	PacBio	exon	5238	5939	.	-	.	gene_id "PBfusion.173"; transcript_id "PBfusion.173.2";
GWHAAEP00009916	PacBio	exon	6206	6545	.	-	.	gene_id "PBfusion.173"; transcript_id "PBfusion.173.2";
GWHAAEP00000633	PacBio	transcript	181607	185488	.	+	.	gene_id "PBfusion.58"; transcript_id "PBfusion.58.1";
GWHAAEP00000633	PacBio	exon	181607	183279	.	+	.	gene_id "PBfusion.58"; transcript_id "PBfusion.58.1";
GWHAAEP00000633	PacBio	exon	183921	184093	.	+	.	gene_id "PBfusion.58"; transcript_id "PBfusion.58.1";
GWHAAEP00000633	PacBio	exon	184189	185488	.	+	.	gene_id "PBfusion.58"; transcript_id "PBfusion.58.1";
GWHAAEP00000862	PacBio	transcript	235013	238894	.	+	.	gene_id "PBfusion.58"; transcript_id "PBfusion.58.2";
GWHAAEP00000862	PacBio	exon	235013	236685	.	+	.	gene_id "PBfusion.58"; transcript_id "PBfusion.58.2";
GWHAAEP00000862	PacBio	exon	237327	237499	.	+	.	gene_id "PBfusion.58"; transcript_id "PBfusion.58.2";
GWHAAEP00000862	PacBio	exon	237595	238894	.	+	.	gene_id "PBfusion.58"; transcript_id "PBfusion.58.2";
GWHAAEP00004356	PacBio	transcript	188531	190585	.	-	.	gene_id "PBfusion.59"; transcript_id "PBfusion.59.1";
GWHAAEP00004356	PacBio	exon	188531	188782	.	-	.	gene_id "PBfusion.59"; transcript_id "PBfusion.59.1";
GWHAAEP00004356	PacBio	exon	188861	189064	.	-	.	gene_id "PBfusion.59"; transcript_id "PBfusion.59.1";
GWHAAEP00004356	PacBio	exon	189217	189485	.	-	.	gene_id "PBfusion.59"; transcript_id "PBfusion.59.1";
GWHAAEP00004356	PacBio	exon	190309	190420	.	-	.	gene_id "PBfusion.59"; transcript_id "PBfusion.59.1";
GWHAAEP00004356	PacBio	exon	190517	190585	.	-	.	gene_id "PBfusion.59"; transcript_id "PBfusion.59.1";
GWHAAEP00007650	PacBio	transcript	905	2964	.	-	.	gene_id "PBfusion.59"; transcript_id "PBfusion.59.2";
GWHAAEP00007650	PacBio	exon	905	1156	.	-	.	gene_id "PBfusion.59"; transcript_id "PBfusion.59.2";
GWHAAEP00007650	PacBio	exon	1235	1438	.	-	.	gene_id "PBfusion.59"; transcript_id "PBfusion.59.2";
GWHAAEP00007650	PacBio	exon	1596	1864	.	-	.	gene_id "PBfusion.59"; transcript_id "PBfusion.59.2";
GWHAAEP00007650	PacBio	exon	2688	2799	.	-	.	gene_id "PBfusion.59"; transcript_id "PBfusion.59.2";
GWHAAEP00007650	PacBio	exon	2896	2964	.	-	.	gene_id "PBfusion.59"; transcript_id "PBfusion.59.2";
GWHAAEP00000633	PacBio	transcript	79588	84632	.	+	.	gene_id "PBfusion.50"; transcript_id "PBfusion.50.1";
GWHAAEP00000633	PacBio	exon	79588	79747	.	+	.	gene_id "PBfusion.50"; transcript_id "PBfusion.50.1";
GWHAAEP00000633	PacBio	exon	80279	80699	.	+	.	gene_id "PBfusion.50"; transcript_id "PBfusion.50.1";
GWHAAEP00000633	PacBio	exon	81022	81306	.	+	.	gene_id "PBfusion.50"; transcript_id "PBfusion.50.1";
GWHAAEP00000633	PacBio	exon	81408	81725	.	+	.	gene_id "PBfusion.50"; transcript_id "PBfusion.50.1";
GWHAAEP00000633	PacBio	exon	82244	84632	.	+	.	gene_id "PBfusion.50"; transcript_id "PBfusion.50.1";
GWHAAEP00000862	PacBio	transcript	132994	138038	.	+	.	gene_id "PBfusion.50"; transcript_id "PBfusion.50.2";
GWHAAEP00000862	PacBio	exon	132994	133153	.	+	.	gene_id "PBfusion.50"; transcript_id "PBfusion.50.2";
GWHAAEP00000862	PacBio	exon	133685	134105	.	+	.	gene_id "PBfusion.50"; transcript_id "PBfusion.50.2";
GWHAAEP00000862	PacBio	exon	134428	134712	.	+	.	gene_id "PBfusion.50"; transcript_id "PBfusion.50.2";
GWHAAEP00000862	PacBio	exon	134814	135131	.	+	.	gene_id "PBfusion.50"; transcript_id "PBfusion.50.2";
GWHAAEP00000862	PacBio	exon	135650	138038	.	+	.	gene_id "PBfusion.50"; transcript_id "PBfusion.50.2";
GWHAAEP00004424	PacBio	transcript	2303	3686	.	-	.	gene_id "PBfusion.51"; transcript_id "PBfusion.51.1";
GWHAAEP00004424	PacBio	exon	2303	3686	.	-	.	gene_id "PBfusion.51"; transcript_id "PBfusion.51.1";
GWHAAEP00004838	PacBio	transcript	98745	100128	.	-	.	gene_id "PBfusion.51"; transcript_id "PBfusion.51.2";
GWHAAEP00004838	PacBio	exon	98745	100128	.	-	.	gene_id "PBfusion.51"; transcript_id "PBfusion.51.2";
GWHAAEP00000590	PacBio	transcript	40704	43897	.	-	.	gene_id "PBfusion.52"; transcript_id "PBfusion.52.1";
GWHAAEP00000590	PacBio	exon	40704	41266	.	-	.	gene_id "PBfusion.52"; transcript_id "PBfusion.52.1";
GWHAAEP00000590	PacBio	exon	41536	41659	.	-	.	gene_id "PBfusion.52"; transcript_id "PBfusion.52.1";
GWHAAEP00000590	PacBio	exon	41809	41951	.	-	.	gene_id "PBfusion.52"; transcript_id "PBfusion.52.1";
GWHAAEP00000590	PacBio	exon	42083	42218	.	-	.	gene_id "PBfusion.52"; transcript_id "PBfusion.52.1";
GWHAAEP00000590	PacBio	exon	42550	43897	.	-	.	gene_id "PBfusion.52"; transcript_id "PBfusion.52.1";
GWHAAEP00002135	PacBio	transcript	110862	114055	.	+	.	gene_id "PBfusion.52"; transcript_id "PBfusion.52.2";
GWHAAEP00002135	PacBio	exon	110862	112209	.	+	.	gene_id "PBfusion.52"; transcript_id "PBfusion.52.2";
GWHAAEP00002135	PacBio	exon	112541	112676	.	+	.	gene_id "PBfusion.52"; transcript_id "PBfusion.52.2";
GWHAAEP00002135	PacBio	exon	112808	112950	.	+	.	gene_id "PBfusion.52"; transcript_id "PBfusion.52.2";
GWHAAEP00002135	PacBio	exon	113100	113223	.	+	.	gene_id "PBfusion.52"; transcript_id "PBfusion.52.2";
GWHAAEP00002135	PacBio	exon	113493	114055	.	+	.	gene_id "PBfusion.52"; transcript_id "PBfusion.52.2";
GWHAAEP00003098	PacBio	transcript	154199	155697	.	+	.	gene_id "PBfusion.53"; transcript_id "PBfusion.53.1";
GWHAAEP00003098	PacBio	exon	154199	154579	.	+	.	gene_id "PBfusion.53"; transcript_id "PBfusion.53.1";
GWHAAEP00003098	PacBio	exon	154707	154912	.	+	.	gene_id "PBfusion.53"; transcript_id "PBfusion.53.1";
GWHAAEP00003098	PacBio	exon	154994	155093	.	+	.	gene_id "PBfusion.53"; transcript_id "PBfusion.53.1";
GWHAAEP00003098	PacBio	exon	155189	155697	.	+	.	gene_id "PBfusion.53"; transcript_id "PBfusion.53.1";
GWHAAEP00003189	PacBio	transcript	4935	6435	.	-	.	gene_id "PBfusion.53"; transcript_id "PBfusion.53.2";
GWHAAEP00003189	PacBio	exon	4935	5443	.	-	.	gene_id "PBfusion.53"; transcript_id "PBfusion.53.2";
GWHAAEP00003189	PacBio	exon	5539	5638	.	-	.	gene_id "PBfusion.53"; transcript_id "PBfusion.53.2";
GWHAAEP00003189	PacBio	exon	5720	5925	.	-	.	gene_id "PBfusion.53"; transcript_id "PBfusion.53.2";
GWHAAEP00003189	PacBio	exon	6055	6435	.	-	.	gene_id "PBfusion.53"; transcript_id "PBfusion.53.2";
GWHAAEP00002172	PacBio	transcript	736437	737694	.	+	.	gene_id "PBfusion.54"; transcript_id "PBfusion.54.1";
GWHAAEP00002172	PacBio	exon	736437	737694	.	+	.	gene_id "PBfusion.54"; transcript_id "PBfusion.54.1";
GWHAAEP00014412	PacBio	transcript	2511	3768	.	+	.	gene_id "PBfusion.54"; transcript_id "PBfusion.54.2";
GWHAAEP00014412	PacBio	exon	2511	3768	.	+	.	gene_id "PBfusion.54"; transcript_id "PBfusion.54.2";
GWHAAEP00002461	PacBio	transcript	850575	859986	.	+	.	gene_id "PBfusion.55"; transcript_id "PBfusion.55.1";
GWHAAEP00002461	PacBio	exon	850575	850727	.	+	.	gene_id "PBfusion.55"; transcript_id "PBfusion.55.1";
GWHAAEP00002461	PacBio	exon	850959	851069	.	+	.	gene_id "PBfusion.55"; transcript_id "PBfusion.55.1";
GWHAAEP00002461	PacBio	exon	851153	851331	.	+	.	gene_id "PBfusion.55"; transcript_id "PBfusion.55.1";
GWHAAEP00002461	PacBio	exon	851813	851962	.	+	.	gene_id "PBfusion.55"; transcript_id "PBfusion.55.1";
GWHAAEP00002461	PacBio	exon	852832	852920	.	+	.	gene_id "PBfusion.55"; transcript_id "PBfusion.55.1";
GWHAAEP00002461	PacBio	exon	853075	853184	.	+	.	gene_id "PBfusion.55"; transcript_id "PBfusion.55.1";
GWHAAEP00002461	PacBio	exon	853336	853430	.	+	.	gene_id "PBfusion.55"; transcript_id "PBfusion.55.1";
GWHAAEP00002461	PacBio	exon	854314	854369	.	+	.	gene_id "PBfusion.55"; transcript_id "PBfusion.55.1";
GWHAAEP00002461	PacBio	exon	854581	854746	.	+	.	gene_id "PBfusion.55"; transcript_id "PBfusion.55.1";
GWHAAEP00002461	PacBio	exon	855877	855969	.	+	.	gene_id "PBfusion.55"; transcript_id "PBfusion.55.1";
GWHAAEP00002461	PacBio	exon	856352	856480	.	+	.	gene_id "PBfusion.55"; transcript_id "PBfusion.55.1";
GWHAAEP00002461	PacBio	exon	856756	856875	.	+	.	gene_id "PBfusion.55"; transcript_id "PBfusion.55.1";
GWHAAEP00002461	PacBio	exon	857225	857305	.	+	.	gene_id "PBfusion.55"; transcript_id "PBfusion.55.1";
GWHAAEP00002461	PacBio	exon	857884	858018	.	+	.	gene_id "PBfusion.55"; transcript_id "PBfusion.55.1";
GWHAAEP00002461	PacBio	exon	858132	858275	.	+	.	gene_id "PBfusion.55"; transcript_id "PBfusion.55.1";
GWHAAEP00002461	PacBio	exon	858363	858464	.	+	.	gene_id "PBfusion.55"; transcript_id "PBfusion.55.1";
GWHAAEP00002461	PacBio	exon	858883	858962	.	+	.	gene_id "PBfusion.55"; transcript_id "PBfusion.55.1";
GWHAAEP00002461	PacBio	exon	859624	859716	.	+	.	gene_id "PBfusion.55"; transcript_id "PBfusion.55.1";
GWHAAEP00002461	PacBio	exon	859800	859986	.	+	.	gene_id "PBfusion.55"; transcript_id "PBfusion.55.1";
GWHAAEP00006596	PacBio	transcript	120601	130012	.	+	.	gene_id "PBfusion.55"; transcript_id "PBfusion.55.2";
GWHAAEP00006596	PacBio	exon	120601	120753	.	+	.	gene_id "PBfusion.55"; transcript_id "PBfusion.55.2";
GWHAAEP00006596	PacBio	exon	120985	121095	.	+	.	gene_id "PBfusion.55"; transcript_id "PBfusion.55.2";
GWHAAEP00006596	PacBio	exon	121179	121357	.	+	.	gene_id "PBfusion.55"; transcript_id "PBfusion.55.2";
GWHAAEP00006596	PacBio	exon	121839	121988	.	+	.	gene_id "PBfusion.55"; transcript_id "PBfusion.55.2";
GWHAAEP00006596	PacBio	exon	122858	122946	.	+	.	gene_id "PBfusion.55"; transcript_id "PBfusion.55.2";
GWHAAEP00006596	PacBio	exon	123101	123210	.	+	.	gene_id "PBfusion.55"; transcript_id "PBfusion.55.2";
GWHAAEP00006596	PacBio	exon	123362	123456	.	+	.	gene_id "PBfusion.55"; transcript_id "PBfusion.55.2";
GWHAAEP00006596	PacBio	exon	124340	124395	.	+	.	gene_id "PBfusion.55"; transcript_id "PBfusion.55.2";
GWHAAEP00006596	PacBio	exon	124607	124772	.	+	.	gene_id "PBfusion.55"; transcript_id "PBfusion.55.2";
GWHAAEP00006596	PacBio	exon	125903	125995	.	+	.	gene_id "PBfusion.55"; transcript_id "PBfusion.55.2";
GWHAAEP00006596	PacBio	exon	126378	126506	.	+	.	gene_id "PBfusion.55"; transcript_id "PBfusion.55.2";
GWHAAEP00006596	PacBio	exon	126782	126901	.	+	.	gene_id "PBfusion.55"; transcript_id "PBfusion.55.2";
GWHAAEP00006596	PacBio	exon	127251	127331	.	+	.	gene_id "PBfusion.55"; transcript_id "PBfusion.55.2";
GWHAAEP00006596	PacBio	exon	127910	128044	.	+	.	gene_id "PBfusion.55"; transcript_id "PBfusion.55.2";
GWHAAEP00006596	PacBio	exon	128158	128301	.	+	.	gene_id "PBfusion.55"; transcript_id "PBfusion.55.2";
GWHAAEP00006596	PacBio	exon	128389	128490	.	+	.	gene_id "PBfusion.55"; transcript_id "PBfusion.55.2";
GWHAAEP00006596	PacBio	exon	128909	128988	.	+	.	gene_id "PBfusion.55"; transcript_id "PBfusion.55.2";
GWHAAEP00006596	PacBio	exon	129650	129742	.	+	.	gene_id "PBfusion.55"; transcript_id "PBfusion.55.2";
GWHAAEP00006596	PacBio	exon	129826	130012	.	+	.	gene_id "PBfusion.55"; transcript_id "PBfusion.55.2";
GWHAAEP00001800	PacBio	transcript	458004	462192	.	+	.	gene_id "PBfusion.56"; transcript_id "PBfusion.56.1";
GWHAAEP00001800	PacBio	exon	458004	458307	.	+	.	gene_id "PBfusion.56"; transcript_id "PBfusion.56.1";
GWHAAEP00001800	PacBio	exon	459042	462192	.	+	.	gene_id "PBfusion.56"; transcript_id "PBfusion.56.1";
GWHAAEP00007290	PacBio	transcript	221	4422	.	-	.	gene_id "PBfusion.56"; transcript_id "PBfusion.56.2";
GWHAAEP00007290	PacBio	exon	221	3371	.	-	.	gene_id "PBfusion.56"; transcript_id "PBfusion.56.2";
GWHAAEP00007290	PacBio	exon	4119	4422	.	-	.	gene_id "PBfusion.56"; transcript_id "PBfusion.56.2";
GWHAAEP00001429	PacBio	transcript	210870	215375	.	+	.	gene_id "PBfusion.57"; transcript_id "PBfusion.57.1";
GWHAAEP00001429	PacBio	exon	210870	211130	.	+	.	gene_id "PBfusion.57"; transcript_id "PBfusion.57.1";
GWHAAEP00001429	PacBio	exon	211419	214113	.	+	.	gene_id "PBfusion.57"; transcript_id "PBfusion.57.1";
GWHAAEP00001429	PacBio	exon	215016	215375	.	+	.	gene_id "PBfusion.57"; transcript_id "PBfusion.57.1";
GWHAAEP00010803	PacBio	transcript	3039	7544	.	+	.	gene_id "PBfusion.57"; transcript_id "PBfusion.57.2";
GWHAAEP00010803	PacBio	exon	3039	3299	.	+	.	gene_id "PBfusion.57"; transcript_id "PBfusion.57.2";
GWHAAEP00010803	PacBio	exon	3588	6282	.	+	.	gene_id "PBfusion.57"; transcript_id "PBfusion.57.2";
GWHAAEP00010803	PacBio	exon	7185	7544	.	+	.	gene_id "PBfusion.57"; transcript_id "PBfusion.57.2";
GWHAAEP00002461	PacBio	transcript	850534	859985	.	+	.	gene_id "PBfusion.167"; transcript_id "PBfusion.167.1";
GWHAAEP00002461	PacBio	exon	850534	850727	.	+	.	gene_id "PBfusion.167"; transcript_id "PBfusion.167.1";
GWHAAEP00002461	PacBio	exon	850959	851069	.	+	.	gene_id "PBfusion.167"; transcript_id "PBfusion.167.1";
GWHAAEP00002461	PacBio	exon	851153	851331	.	+	.	gene_id "PBfusion.167"; transcript_id "PBfusion.167.1";
GWHAAEP00002461	PacBio	exon	851813	851962	.	+	.	gene_id "PBfusion.167"; transcript_id "PBfusion.167.1";
GWHAAEP00002461	PacBio	exon	852832	852920	.	+	.	gene_id "PBfusion.167"; transcript_id "PBfusion.167.1";
GWHAAEP00002461	PacBio	exon	853075	853184	.	+	.	gene_id "PBfusion.167"; transcript_id "PBfusion.167.1";
GWHAAEP00002461	PacBio	exon	853336	853430	.	+	.	gene_id "PBfusion.167"; transcript_id "PBfusion.167.1";
GWHAAEP00002461	PacBio	exon	854314	854369	.	+	.	gene_id "PBfusion.167"; transcript_id "PBfusion.167.1";
GWHAAEP00002461	PacBio	exon	854581	854746	.	+	.	gene_id "PBfusion.167"; transcript_id "PBfusion.167.1";
GWHAAEP00002461	PacBio	exon	855877	855969	.	+	.	gene_id "PBfusion.167"; transcript_id "PBfusion.167.1";
GWHAAEP00002461	PacBio	exon	856352	856480	.	+	.	gene_id "PBfusion.167"; transcript_id "PBfusion.167.1";
GWHAAEP00002461	PacBio	exon	856756	856875	.	+	.	gene_id "PBfusion.167"; transcript_id "PBfusion.167.1";
GWHAAEP00002461	PacBio	exon	857225	857305	.	+	.	gene_id "PBfusion.167"; transcript_id "PBfusion.167.1";
GWHAAEP00002461	PacBio	exon	857884	857991	.	+	.	gene_id "PBfusion.167"; transcript_id "PBfusion.167.1";
GWHAAEP00002461	PacBio	exon	858132	858275	.	+	.	gene_id "PBfusion.167"; transcript_id "PBfusion.167.1";
GWHAAEP00002461	PacBio	exon	858363	858962	.	+	.	gene_id "PBfusion.167"; transcript_id "PBfusion.167.1";
GWHAAEP00002461	PacBio	exon	859624	859716	.	+	.	gene_id "PBfusion.167"; transcript_id "PBfusion.167.1";
GWHAAEP00002461	PacBio	exon	859800	859985	.	+	.	gene_id "PBfusion.167"; transcript_id "PBfusion.167.1";
GWHAAEP00006596	PacBio	transcript	120560	130011	.	+	.	gene_id "PBfusion.167"; transcript_id "PBfusion.167.2";
GWHAAEP00006596	PacBio	exon	120560	120753	.	+	.	gene_id "PBfusion.167"; transcript_id "PBfusion.167.2";
GWHAAEP00006596	PacBio	exon	120985	121095	.	+	.	gene_id "PBfusion.167"; transcript_id "PBfusion.167.2";
GWHAAEP00006596	PacBio	exon	121179	121357	.	+	.	gene_id "PBfusion.167"; transcript_id "PBfusion.167.2";
GWHAAEP00006596	PacBio	exon	121839	121988	.	+	.	gene_id "PBfusion.167"; transcript_id "PBfusion.167.2";
GWHAAEP00006596	PacBio	exon	122858	122946	.	+	.	gene_id "PBfusion.167"; transcript_id "PBfusion.167.2";
GWHAAEP00006596	PacBio	exon	123101	123210	.	+	.	gene_id "PBfusion.167"; transcript_id "PBfusion.167.2";
GWHAAEP00006596	PacBio	exon	123362	123456	.	+	.	gene_id "PBfusion.167"; transcript_id "PBfusion.167.2";
GWHAAEP00006596	PacBio	exon	124340	124395	.	+	.	gene_id "PBfusion.167"; transcript_id "PBfusion.167.2";
GWHAAEP00006596	PacBio	exon	124607	124772	.	+	.	gene_id "PBfusion.167"; transcript_id "PBfusion.167.2";
GWHAAEP00006596	PacBio	exon	125903	125995	.	+	.	gene_id "PBfusion.167"; transcript_id "PBfusion.167.2";
GWHAAEP00006596	PacBio	exon	126378	126506	.	+	.	gene_id "PBfusion.167"; transcript_id "PBfusion.167.2";
GWHAAEP00006596	PacBio	exon	126782	126901	.	+	.	gene_id "PBfusion.167"; transcript_id "PBfusion.167.2";
GWHAAEP00006596	PacBio	exon	127251	127331	.	+	.	gene_id "PBfusion.167"; transcript_id "PBfusion.167.2";
GWHAAEP00006596	PacBio	exon	127910	128017	.	+	.	gene_id "PBfusion.167"; transcript_id "PBfusion.167.2";
GWHAAEP00006596	PacBio	exon	128158	128301	.	+	.	gene_id "PBfusion.167"; transcript_id "PBfusion.167.2";
GWHAAEP00006596	PacBio	exon	128389	128988	.	+	.	gene_id "PBfusion.167"; transcript_id "PBfusion.167.2";
GWHAAEP00006596	PacBio	exon	129650	129742	.	+	.	gene_id "PBfusion.167"; transcript_id "PBfusion.167.2";
GWHAAEP00006596	PacBio	exon	129826	130011	.	+	.	gene_id "PBfusion.167"; transcript_id "PBfusion.167.2";
GWHAAEP00001291	PacBio	transcript	37490	42349	.	+	.	gene_id "PBfusion.166"; transcript_id "PBfusion.166.1";
GWHAAEP00001291	PacBio	exon	37490	37803	.	+	.	gene_id "PBfusion.166"; transcript_id "PBfusion.166.1";
GWHAAEP00001291	PacBio	exon	38207	38445	.	+	.	gene_id "PBfusion.166"; transcript_id "PBfusion.166.1";
GWHAAEP00001291	PacBio	exon	38666	38929	.	+	.	gene_id "PBfusion.166"; transcript_id "PBfusion.166.1";
GWHAAEP00001291	PacBio	exon	39016	39083	.	+	.	gene_id "PBfusion.166"; transcript_id "PBfusion.166.1";
GWHAAEP00001291	PacBio	exon	39171	39199	.	+	.	gene_id "PBfusion.166"; transcript_id "PBfusion.166.1";
GWHAAEP00001291	PacBio	exon	39302	39498	.	+	.	gene_id "PBfusion.166"; transcript_id "PBfusion.166.1";
GWHAAEP00001291	PacBio	exon	39588	39800	.	+	.	gene_id "PBfusion.166"; transcript_id "PBfusion.166.1";
GWHAAEP00001291	PacBio	exon	39891	40028	.	+	.	gene_id "PBfusion.166"; transcript_id "PBfusion.166.1";
GWHAAEP00001291	PacBio	exon	40298	40414	.	+	.	gene_id "PBfusion.166"; transcript_id "PBfusion.166.1";
GWHAAEP00001291	PacBio	exon	40492	40545	.	+	.	gene_id "PBfusion.166"; transcript_id "PBfusion.166.1";
GWHAAEP00001291	PacBio	exon	41478	41594	.	+	.	gene_id "PBfusion.166"; transcript_id "PBfusion.166.1";
GWHAAEP00001291	PacBio	exon	41816	41912	.	+	.	gene_id "PBfusion.166"; transcript_id "PBfusion.166.1";
GWHAAEP00001291	PacBio	exon	42059	42349	.	+	.	gene_id "PBfusion.166"; transcript_id "PBfusion.166.1";
GWHAAEP00007848	PacBio	transcript	144	5003	.	+	.	gene_id "PBfusion.166"; transcript_id "PBfusion.166.2";
GWHAAEP00007848	PacBio	exon	144	457	.	+	.	gene_id "PBfusion.166"; transcript_id "PBfusion.166.2";
GWHAAEP00007848	PacBio	exon	861	1099	.	+	.	gene_id "PBfusion.166"; transcript_id "PBfusion.166.2";
GWHAAEP00007848	PacBio	exon	1320	1583	.	+	.	gene_id "PBfusion.166"; transcript_id "PBfusion.166.2";
GWHAAEP00007848	PacBio	exon	1670	1737	.	+	.	gene_id "PBfusion.166"; transcript_id "PBfusion.166.2";
GWHAAEP00007848	PacBio	exon	1825	1853	.	+	.	gene_id "PBfusion.166"; transcript_id "PBfusion.166.2";
GWHAAEP00007848	PacBio	exon	1956	2152	.	+	.	gene_id "PBfusion.166"; transcript_id "PBfusion.166.2";
GWHAAEP00007848	PacBio	exon	2242	2454	.	+	.	gene_id "PBfusion.166"; transcript_id "PBfusion.166.2";
GWHAAEP00007848	PacBio	exon	2545	2682	.	+	.	gene_id "PBfusion.166"; transcript_id "PBfusion.166.2";
GWHAAEP00007848	PacBio	exon	2952	3068	.	+	.	gene_id "PBfusion.166"; transcript_id "PBfusion.166.2";
GWHAAEP00007848	PacBio	exon	3146	3199	.	+	.	gene_id "PBfusion.166"; transcript_id "PBfusion.166.2";
GWHAAEP00007848	PacBio	exon	4132	4248	.	+	.	gene_id "PBfusion.166"; transcript_id "PBfusion.166.2";
GWHAAEP00007848	PacBio	exon	4470	4566	.	+	.	gene_id "PBfusion.166"; transcript_id "PBfusion.166.2";
GWHAAEP00007848	PacBio	exon	4713	5003	.	+	.	gene_id "PBfusion.166"; transcript_id "PBfusion.166.2";
GWHAAEP00000633	PacBio	transcript	79604	85678	.	+	.	gene_id "PBfusion.165"; transcript_id "PBfusion.165.1";
GWHAAEP00000633	PacBio	exon	79604	79747	.	+	.	gene_id "PBfusion.165"; transcript_id "PBfusion.165.1";
GWHAAEP00000633	PacBio	exon	80279	80699	.	+	.	gene_id "PBfusion.165"; transcript_id "PBfusion.165.1";
GWHAAEP00000633	PacBio	exon	81022	81306	.	+	.	gene_id "PBfusion.165"; transcript_id "PBfusion.165.1";
GWHAAEP00000633	PacBio	exon	81408	81725	.	+	.	gene_id "PBfusion.165"; transcript_id "PBfusion.165.1";
GWHAAEP00000633	PacBio	exon	82244	82471	.	+	.	gene_id "PBfusion.165"; transcript_id "PBfusion.165.1";
GWHAAEP00000633	PacBio	exon	83576	85678	.	+	.	gene_id "PBfusion.165"; transcript_id "PBfusion.165.1";
GWHAAEP00000862	PacBio	transcript	133010	139084	.	+	.	gene_id "PBfusion.165"; transcript_id "PBfusion.165.2";
GWHAAEP00000862	PacBio	exon	133010	133153	.	+	.	gene_id "PBfusion.165"; transcript_id "PBfusion.165.2";
GWHAAEP00000862	PacBio	exon	133685	134105	.	+	.	gene_id "PBfusion.165"; transcript_id "PBfusion.165.2";
GWHAAEP00000862	PacBio	exon	134428	134712	.	+	.	gene_id "PBfusion.165"; transcript_id "PBfusion.165.2";
GWHAAEP00000862	PacBio	exon	134814	135131	.	+	.	gene_id "PBfusion.165"; transcript_id "PBfusion.165.2";
GWHAAEP00000862	PacBio	exon	135650	135877	.	+	.	gene_id "PBfusion.165"; transcript_id "PBfusion.165.2";
GWHAAEP00000862	PacBio	exon	136982	139084	.	+	.	gene_id "PBfusion.165"; transcript_id "PBfusion.165.2";
GWHAAEP00000633	PacBio	transcript	191139	195379	.	+	.	gene_id "PBfusion.164"; transcript_id "PBfusion.164.1";
GWHAAEP00000633	PacBio	exon	191139	191383	.	+	.	gene_id "PBfusion.164"; transcript_id "PBfusion.164.1";
GWHAAEP00000633	PacBio	exon	191450	193443	.	+	.	gene_id "PBfusion.164"; transcript_id "PBfusion.164.1";
GWHAAEP00000633	PacBio	exon	194094	194263	.	+	.	gene_id "PBfusion.164"; transcript_id "PBfusion.164.1";
GWHAAEP00000633	PacBio	exon	194359	195379	.	+	.	gene_id "PBfusion.164"; transcript_id "PBfusion.164.1";
GWHAAEP00000862	PacBio	transcript	244545	248785	.	+	.	gene_id "PBfusion.164"; transcript_id "PBfusion.164.2";
GWHAAEP00000862	PacBio	exon	244545	244789	.	+	.	gene_id "PBfusion.164"; transcript_id "PBfusion.164.2";
GWHAAEP00000862	PacBio	exon	244856	246849	.	+	.	gene_id "PBfusion.164"; transcript_id "PBfusion.164.2";
GWHAAEP00000862	PacBio	exon	247500	247669	.	+	.	gene_id "PBfusion.164"; transcript_id "PBfusion.164.2";
GWHAAEP00000862	PacBio	exon	247765	248785	.	+	.	gene_id "PBfusion.164"; transcript_id "PBfusion.164.2";
GWHAAEP00000484	PacBio	transcript	529880	531966	.	+	.	gene_id "PBfusion.163"; transcript_id "PBfusion.163.1";
GWHAAEP00000484	PacBio	exon	529880	531966	.	+	.	gene_id "PBfusion.163"; transcript_id "PBfusion.163.1";
GWHAAEP00001587	PacBio	transcript	2731	4817	.	+	.	gene_id "PBfusion.163"; transcript_id "PBfusion.163.2";
GWHAAEP00001587	PacBio	exon	2731	4817	.	+	.	gene_id "PBfusion.163"; transcript_id "PBfusion.163.2";
GWHAAEP00002461	PacBio	transcript	787385	792554	.	-	.	gene_id "PBfusion.162"; transcript_id "PBfusion.162.1";
GWHAAEP00002461	PacBio	exon	787385	788728	.	-	.	gene_id "PBfusion.162"; transcript_id "PBfusion.162.1";
GWHAAEP00002461	PacBio	exon	788915	788990	.	-	.	gene_id "PBfusion.162"; transcript_id "PBfusion.162.1";
GWHAAEP00002461	PacBio	exon	789079	789131	.	-	.	gene_id "PBfusion.162"; transcript_id "PBfusion.162.1";
GWHAAEP00002461	PacBio	exon	790489	790545	.	-	.	gene_id "PBfusion.162"; transcript_id "PBfusion.162.1";
GWHAAEP00002461	PacBio	exon	790627	790695	.	-	.	gene_id "PBfusion.162"; transcript_id "PBfusion.162.1";
GWHAAEP00002461	PacBio	exon	790787	791009	.	-	.	gene_id "PBfusion.162"; transcript_id "PBfusion.162.1";
GWHAAEP00002461	PacBio	exon	791180	791573	.	-	.	gene_id "PBfusion.162"; transcript_id "PBfusion.162.1";
GWHAAEP00002461	PacBio	exon	791941	792114	.	-	.	gene_id "PBfusion.162"; transcript_id "PBfusion.162.1";
GWHAAEP00002461	PacBio	exon	792306	792554	.	-	.	gene_id "PBfusion.162"; transcript_id "PBfusion.162.1";
GWHAAEP00006596	PacBio	transcript	57411	62580	.	-	.	gene_id "PBfusion.162"; transcript_id "PBfusion.162.2";
GWHAAEP00006596	PacBio	exon	57411	58754	.	-	.	gene_id "PBfusion.162"; transcript_id "PBfusion.162.2";
GWHAAEP00006596	PacBio	exon	58941	59016	.	-	.	gene_id "PBfusion.162"; transcript_id "PBfusion.162.2";
GWHAAEP00006596	PacBio	exon	59105	59157	.	-	.	gene_id "PBfusion.162"; transcript_id "PBfusion.162.2";
GWHAAEP00006596	PacBio	exon	60515	60571	.	-	.	gene_id "PBfusion.162"; transcript_id "PBfusion.162.2";
GWHAAEP00006596	PacBio	exon	60653	60721	.	-	.	gene_id "PBfusion.162"; transcript_id "PBfusion.162.2";
GWHAAEP00006596	PacBio	exon	60813	61035	.	-	.	gene_id "PBfusion.162"; transcript_id "PBfusion.162.2";
GWHAAEP00006596	PacBio	exon	61206	61599	.	-	.	gene_id "PBfusion.162"; transcript_id "PBfusion.162.2";
GWHAAEP00006596	PacBio	exon	61967	62140	.	-	.	gene_id "PBfusion.162"; transcript_id "PBfusion.162.2";
GWHAAEP00006596	PacBio	exon	62332	62580	.	-	.	gene_id "PBfusion.162"; transcript_id "PBfusion.162.2";
GWHAAEP00001936	PacBio	transcript	974651	987955	.	+	.	gene_id "PBfusion.161"; transcript_id "PBfusion.161.1";
GWHAAEP00001936	PacBio	exon	974651	975000	.	+	.	gene_id "PBfusion.161"; transcript_id "PBfusion.161.1";
GWHAAEP00001936	PacBio	exon	977721	977874	.	+	.	gene_id "PBfusion.161"; transcript_id "PBfusion.161.1";
GWHAAEP00001936	PacBio	exon	978021	978120	.	+	.	gene_id "PBfusion.161"; transcript_id "PBfusion.161.1";
GWHAAEP00001936	PacBio	exon	978586	978654	.	+	.	gene_id "PBfusion.161"; transcript_id "PBfusion.161.1";
GWHAAEP00001936	PacBio	exon	978770	979006	.	+	.	gene_id "PBfusion.161"; transcript_id "PBfusion.161.1";
GWHAAEP00001936	PacBio	exon	979118	979295	.	+	.	gene_id "PBfusion.161"; transcript_id "PBfusion.161.1";
GWHAAEP00001936	PacBio	exon	979460	979592	.	+	.	gene_id "PBfusion.161"; transcript_id "PBfusion.161.1";
GWHAAEP00001936	PacBio	exon	980455	980614	.	+	.	gene_id "PBfusion.161"; transcript_id "PBfusion.161.1";
GWHAAEP00001936	PacBio	exon	980734	980884	.	+	.	gene_id "PBfusion.161"; transcript_id "PBfusion.161.1";
GWHAAEP00001936	PacBio	exon	980967	981067	.	+	.	gene_id "PBfusion.161"; transcript_id "PBfusion.161.1";
GWHAAEP00001936	PacBio	exon	981167	981325	.	+	.	gene_id "PBfusion.161"; transcript_id "PBfusion.161.1";
GWHAAEP00001936	PacBio	exon	982224	982292	.	+	.	gene_id "PBfusion.161"; transcript_id "PBfusion.161.1";
GWHAAEP00001936	PacBio	exon	982364	982432	.	+	.	gene_id "PBfusion.161"; transcript_id "PBfusion.161.1";
GWHAAEP00001936	PacBio	exon	982546	982683	.	+	.	gene_id "PBfusion.161"; transcript_id "PBfusion.161.1";
GWHAAEP00001936	PacBio	exon	983233	983361	.	+	.	gene_id "PBfusion.161"; transcript_id "PBfusion.161.1";
GWHAAEP00001936	PacBio	exon	983561	983680	.	+	.	gene_id "PBfusion.161"; transcript_id "PBfusion.161.1";
GWHAAEP00001936	PacBio	exon	983844	984073	.	+	.	gene_id "PBfusion.161"; transcript_id "PBfusion.161.1";
GWHAAEP00001936	PacBio	exon	984146	984271	.	+	.	gene_id "PBfusion.161"; transcript_id "PBfusion.161.1";
GWHAAEP00001936	PacBio	exon	985224	985289	.	+	.	gene_id "PBfusion.161"; transcript_id "PBfusion.161.1";
GWHAAEP00001936	PacBio	exon	985823	985924	.	+	.	gene_id "PBfusion.161"; transcript_id "PBfusion.161.1";
GWHAAEP00001936	PacBio	exon	986636	986879	.	+	.	gene_id "PBfusion.161"; transcript_id "PBfusion.161.1";
GWHAAEP00001936	PacBio	exon	987074	987312	.	+	.	gene_id "PBfusion.161"; transcript_id "PBfusion.161.1";
GWHAAEP00001936	PacBio	exon	987394	987955	.	+	.	gene_id "PBfusion.161"; transcript_id "PBfusion.161.1";
GWHAAEP00007924	PacBio	transcript	6900	20204	.	+	.	gene_id "PBfusion.161"; transcript_id "PBfusion.161.2";
GWHAAEP00007924	PacBio	exon	6900	7249	.	+	.	gene_id "PBfusion.161"; transcript_id "PBfusion.161.2";
GWHAAEP00007924	PacBio	exon	9970	10123	.	+	.	gene_id "PBfusion.161"; transcript_id "PBfusion.161.2";
GWHAAEP00007924	PacBio	exon	10270	10369	.	+	.	gene_id "PBfusion.161"; transcript_id "PBfusion.161.2";
GWHAAEP00007924	PacBio	exon	10835	10903	.	+	.	gene_id "PBfusion.161"; transcript_id "PBfusion.161.2";
GWHAAEP00007924	PacBio	exon	11019	11255	.	+	.	gene_id "PBfusion.161"; transcript_id "PBfusion.161.2";
GWHAAEP00007924	PacBio	exon	11367	11544	.	+	.	gene_id "PBfusion.161"; transcript_id "PBfusion.161.2";
GWHAAEP00007924	PacBio	exon	11709	11841	.	+	.	gene_id "PBfusion.161"; transcript_id "PBfusion.161.2";
GWHAAEP00007924	PacBio	exon	12704	12863	.	+	.	gene_id "PBfusion.161"; transcript_id "PBfusion.161.2";
GWHAAEP00007924	PacBio	exon	12983	13133	.	+	.	gene_id "PBfusion.161"; transcript_id "PBfusion.161.2";
GWHAAEP00007924	PacBio	exon	13216	13316	.	+	.	gene_id "PBfusion.161"; transcript_id "PBfusion.161.2";
GWHAAEP00007924	PacBio	exon	13416	13574	.	+	.	gene_id "PBfusion.161"; transcript_id "PBfusion.161.2";
GWHAAEP00007924	PacBio	exon	14473	14541	.	+	.	gene_id "PBfusion.161"; transcript_id "PBfusion.161.2";
GWHAAEP00007924	PacBio	exon	14613	14681	.	+	.	gene_id "PBfusion.161"; transcript_id "PBfusion.161.2";
GWHAAEP00007924	PacBio	exon	14795	14932	.	+	.	gene_id "PBfusion.161"; transcript_id "PBfusion.161.2";
GWHAAEP00007924	PacBio	exon	15482	15610	.	+	.	gene_id "PBfusion.161"; transcript_id "PBfusion.161.2";
GWHAAEP00007924	PacBio	exon	15810	15929	.	+	.	gene_id "PBfusion.161"; transcript_id "PBfusion.161.2";
GWHAAEP00007924	PacBio	exon	16093	16322	.	+	.	gene_id "PBfusion.161"; transcript_id "PBfusion.161.2";
GWHAAEP00007924	PacBio	exon	16395	16520	.	+	.	gene_id "PBfusion.161"; transcript_id "PBfusion.161.2";
GWHAAEP00007924	PacBio	exon	17473	17538	.	+	.	gene_id "PBfusion.161"; transcript_id "PBfusion.161.2";
GWHAAEP00007924	PacBio	exon	18072	18173	.	+	.	gene_id "PBfusion.161"; transcript_id "PBfusion.161.2";
GWHAAEP00007924	PacBio	exon	18885	19128	.	+	.	gene_id "PBfusion.161"; transcript_id "PBfusion.161.2";
GWHAAEP00007924	PacBio	exon	19323	19561	.	+	.	gene_id "PBfusion.161"; transcript_id "PBfusion.161.2";
GWHAAEP00007924	PacBio	exon	19643	20204	.	+	.	gene_id "PBfusion.161"; transcript_id "PBfusion.161.2";
GWHAAEP00000633	PacBio	transcript	14070	17360	.	-	.	gene_id "PBfusion.160"; transcript_id "PBfusion.160.1";
GWHAAEP00000633	PacBio	exon	14070	14271	.	-	.	gene_id "PBfusion.160"; transcript_id "PBfusion.160.1";
GWHAAEP00000633	PacBio	exon	14647	14751	.	-	.	gene_id "PBfusion.160"; transcript_id "PBfusion.160.1";
GWHAAEP00000633	PacBio	exon	14850	16053	.	-	.	gene_id "PBfusion.160"; transcript_id "PBfusion.160.1";
GWHAAEP00000633	PacBio	exon	16274	17360	.	-	.	gene_id "PBfusion.160"; transcript_id "PBfusion.160.1";
GWHAAEP00000862	PacBio	transcript	67476	70766	.	-	.	gene_id "PBfusion.160"; transcript_id "PBfusion.160.2";
GWHAAEP00000862	PacBio	exon	67476	67677	.	-	.	gene_id "PBfusion.160"; transcript_id "PBfusion.160.2";
GWHAAEP00000862	PacBio	exon	68053	68157	.	-	.	gene_id "PBfusion.160"; transcript_id "PBfusion.160.2";
GWHAAEP00000862	PacBio	exon	68256	69459	.	-	.	gene_id "PBfusion.160"; transcript_id "PBfusion.160.2";
GWHAAEP00000862	PacBio	exon	69680	70766	.	-	.	gene_id "PBfusion.160"; transcript_id "PBfusion.160.2";
GWHAAEP00002327	PacBio	transcript	333658	336907	.	-	.	gene_id "PBfusion.169"; transcript_id "PBfusion.169.1";
GWHAAEP00002327	PacBio	exon	333658	334203	.	-	.	gene_id "PBfusion.169"; transcript_id "PBfusion.169.1";
GWHAAEP00002327	PacBio	exon	334306	334417	.	-	.	gene_id "PBfusion.169"; transcript_id "PBfusion.169.1";
GWHAAEP00002327	PacBio	exon	334523	334611	.	-	.	gene_id "PBfusion.169"; transcript_id "PBfusion.169.1";
GWHAAEP00002327	PacBio	exon	334722	334857	.	-	.	gene_id "PBfusion.169"; transcript_id "PBfusion.169.1";
GWHAAEP00002327	PacBio	exon	334966	336370	.	-	.	gene_id "PBfusion.169"; transcript_id "PBfusion.169.1";
GWHAAEP00002327	PacBio	exon	336429	336907	.	-	.	gene_id "PBfusion.169"; transcript_id "PBfusion.169.1";
GWHAAEP00009643	PacBio	transcript	2776	6025	.	-	.	gene_id "PBfusion.169"; transcript_id "PBfusion.169.2";
GWHAAEP00009643	PacBio	exon	2776	3321	.	-	.	gene_id "PBfusion.169"; transcript_id "PBfusion.169.2";
GWHAAEP00009643	PacBio	exon	3424	3535	.	-	.	gene_id "PBfusion.169"; transcript_id "PBfusion.169.2";
GWHAAEP00009643	PacBio	exon	3641	3729	.	-	.	gene_id "PBfusion.169"; transcript_id "PBfusion.169.2";
GWHAAEP00009643	PacBio	exon	3840	3975	.	-	.	gene_id "PBfusion.169"; transcript_id "PBfusion.169.2";
GWHAAEP00009643	PacBio	exon	4084	5488	.	-	.	gene_id "PBfusion.169"; transcript_id "PBfusion.169.2";
GWHAAEP00009643	PacBio	exon	5547	6025	.	-	.	gene_id "PBfusion.169"; transcript_id "PBfusion.169.2";
GWHAAEP00001042	PacBio	transcript	772703	773772	.	+	.	gene_id "PBfusion.168"; transcript_id "PBfusion.168.1";
GWHAAEP00001042	PacBio	exon	772703	773772	.	+	.	gene_id "PBfusion.168"; transcript_id "PBfusion.168.1";
GWHAAEP00011198	PacBio	transcript	178	1247	.	+	.	gene_id "PBfusion.168"; transcript_id "PBfusion.168.2";
GWHAAEP00011198	PacBio	exon	178	1247	.	+	.	gene_id "PBfusion.168"; transcript_id "PBfusion.168.2";
GWHAAEP00002383	PacBio	transcript	536819	538608	.	+	.	gene_id "PBfusion.69"; transcript_id "PBfusion.69.1";
GWHAAEP00002383	PacBio	exon	536819	536999	.	+	.	gene_id "PBfusion.69"; transcript_id "PBfusion.69.1";
GWHAAEP00002383	PacBio	exon	537540	537667	.	+	.	gene_id "PBfusion.69"; transcript_id "PBfusion.69.1";
GWHAAEP00002383	PacBio	exon	537795	538039	.	+	.	gene_id "PBfusion.69"; transcript_id "PBfusion.69.1";
GWHAAEP00002383	PacBio	exon	538214	538608	.	+	.	gene_id "PBfusion.69"; transcript_id "PBfusion.69.1";
GWHAAEP00008852	PacBio	transcript	480	2271	.	-	.	gene_id "PBfusion.69"; transcript_id "PBfusion.69.2";
GWHAAEP00008852	PacBio	exon	480	875	.	-	.	gene_id "PBfusion.69"; transcript_id "PBfusion.69.2";
GWHAAEP00008852	PacBio	exon	1050	1294	.	-	.	gene_id "PBfusion.69"; transcript_id "PBfusion.69.2";
GWHAAEP00008852	PacBio	exon	1422	1549	.	-	.	gene_id "PBfusion.69"; transcript_id "PBfusion.69.2";
GWHAAEP00008852	PacBio	exon	2091	2271	.	-	.	gene_id "PBfusion.69"; transcript_id "PBfusion.69.2";
GWHAAEP00000633	PacBio	transcript	114885	115828	.	+	.	gene_id "PBfusion.68"; transcript_id "PBfusion.68.1";
GWHAAEP00000633	PacBio	exon	114885	115828	.	+	.	gene_id "PBfusion.68"; transcript_id "PBfusion.68.1";
GWHAAEP00000862	PacBio	transcript	168291	169234	.	+	.	gene_id "PBfusion.68"; transcript_id "PBfusion.68.2";
GWHAAEP00000862	PacBio	exon	168291	169234	.	+	.	gene_id "PBfusion.68"; transcript_id "PBfusion.68.2";
GWHAAEP00002227	PacBio	transcript	766712	767644	.	-	.	gene_id "PBfusion.65"; transcript_id "PBfusion.65.1";
GWHAAEP00002227	PacBio	exon	766712	767644	.	-	.	gene_id "PBfusion.65"; transcript_id "PBfusion.65.1";
GWHAAEP00005035	PacBio	transcript	3747	4679	.	-	.	gene_id "PBfusion.65"; transcript_id "PBfusion.65.2";
GWHAAEP00005035	PacBio	exon	3747	4679	.	-	.	gene_id "PBfusion.65"; transcript_id "PBfusion.65.2";
GWHAAEP00002116	PacBio	transcript	1291196	1292418	.	-	.	gene_id "PBfusion.64"; transcript_id "PBfusion.64.1";
GWHAAEP00002116	PacBio	exon	1291196	1292418	.	-	.	gene_id "PBfusion.64"; transcript_id "PBfusion.64.1";
GWHAAEP00002379	PacBio	transcript	6685	7906	.	+	.	gene_id "PBfusion.64"; transcript_id "PBfusion.64.2";
GWHAAEP00002379	PacBio	exon	6685	7906	.	+	.	gene_id "PBfusion.64"; transcript_id "PBfusion.64.2";
GWHAAEP00001291	PacBio	transcript	37476	42349	.	+	.	gene_id "PBfusion.67"; transcript_id "PBfusion.67.1";
GWHAAEP00001291	PacBio	exon	37476	37889	.	+	.	gene_id "PBfusion.67"; transcript_id "PBfusion.67.1";
GWHAAEP00001291	PacBio	exon	38207	38243	.	+	.	gene_id "PBfusion.67"; transcript_id "PBfusion.67.1";
GWHAAEP00001291	PacBio	exon	38329	38445	.	+	.	gene_id "PBfusion.67"; transcript_id "PBfusion.67.1";
GWHAAEP00001291	PacBio	exon	38666	38929	.	+	.	gene_id "PBfusion.67"; transcript_id "PBfusion.67.1";
GWHAAEP00001291	PacBio	exon	39016	39083	.	+	.	gene_id "PBfusion.67"; transcript_id "PBfusion.67.1";
GWHAAEP00001291	PacBio	exon	39171	39199	.	+	.	gene_id "PBfusion.67"; transcript_id "PBfusion.67.1";
GWHAAEP00001291	PacBio	exon	39302	39498	.	+	.	gene_id "PBfusion.67"; transcript_id "PBfusion.67.1";
GWHAAEP00001291	PacBio	exon	39588	39800	.	+	.	gene_id "PBfusion.67"; transcript_id "PBfusion.67.1";
GWHAAEP00001291	PacBio	exon	39891	40028	.	+	.	gene_id "PBfusion.67"; transcript_id "PBfusion.67.1";
GWHAAEP00001291	PacBio	exon	40298	40414	.	+	.	gene_id "PBfusion.67"; transcript_id "PBfusion.67.1";
GWHAAEP00001291	PacBio	exon	40492	40545	.	+	.	gene_id "PBfusion.67"; transcript_id "PBfusion.67.1";
GWHAAEP00001291	PacBio	exon	41478	41594	.	+	.	gene_id "PBfusion.67"; transcript_id "PBfusion.67.1";
GWHAAEP00001291	PacBio	exon	41816	41912	.	+	.	gene_id "PBfusion.67"; transcript_id "PBfusion.67.1";
GWHAAEP00001291	PacBio	exon	42059	42349	.	+	.	gene_id "PBfusion.67"; transcript_id "PBfusion.67.1";
GWHAAEP00007848	PacBio	transcript	130	5003	.	+	.	gene_id "PBfusion.67"; transcript_id "PBfusion.67.2";
GWHAAEP00007848	PacBio	exon	130	543	.	+	.	gene_id "PBfusion.67"; transcript_id "PBfusion.67.2";
GWHAAEP00007848	PacBio	exon	861	897	.	+	.	gene_id "PBfusion.67"; transcript_id "PBfusion.67.2";
GWHAAEP00007848	PacBio	exon	983	1099	.	+	.	gene_id "PBfusion.67"; transcript_id "PBfusion.67.2";
GWHAAEP00007848	PacBio	exon	1320	1583	.	+	.	gene_id "PBfusion.67"; transcript_id "PBfusion.67.2";
GWHAAEP00007848	PacBio	exon	1670	1737	.	+	.	gene_id "PBfusion.67"; transcript_id "PBfusion.67.2";
GWHAAEP00007848	PacBio	exon	1825	1853	.	+	.	gene_id "PBfusion.67"; transcript_id "PBfusion.67.2";
GWHAAEP00007848	PacBio	exon	1956	2152	.	+	.	gene_id "PBfusion.67"; transcript_id "PBfusion.67.2";
GWHAAEP00007848	PacBio	exon	2242	2454	.	+	.	gene_id "PBfusion.67"; transcript_id "PBfusion.67.2";
GWHAAEP00007848	PacBio	exon	2545	2682	.	+	.	gene_id "PBfusion.67"; transcript_id "PBfusion.67.2";
GWHAAEP00007848	PacBio	exon	2952	3068	.	+	.	gene_id "PBfusion.67"; transcript_id "PBfusion.67.2";
GWHAAEP00007848	PacBio	exon	3146	3199	.	+	.	gene_id "PBfusion.67"; transcript_id "PBfusion.67.2";
GWHAAEP00007848	PacBio	exon	4132	4248	.	+	.	gene_id "PBfusion.67"; transcript_id "PBfusion.67.2";
GWHAAEP00007848	PacBio	exon	4470	4566	.	+	.	gene_id "PBfusion.67"; transcript_id "PBfusion.67.2";
GWHAAEP00007848	PacBio	exon	4713	5003	.	+	.	gene_id "PBfusion.67"; transcript_id "PBfusion.67.2";
GWHAAEP00000633	PacBio	transcript	7171	17510	.	-	.	gene_id "PBfusion.66"; transcript_id "PBfusion.66.1";
GWHAAEP00000633	PacBio	exon	7171	7985	.	-	.	gene_id "PBfusion.66"; transcript_id "PBfusion.66.1";
GWHAAEP00000633	PacBio	exon	8109	8194	.	-	.	gene_id "PBfusion.66"; transcript_id "PBfusion.66.1";
GWHAAEP00000633	PacBio	exon	8646	8759	.	-	.	gene_id "PBfusion.66"; transcript_id "PBfusion.66.1";
GWHAAEP00000633	PacBio	exon	10179	10548	.	-	.	gene_id "PBfusion.66"; transcript_id "PBfusion.66.1";
GWHAAEP00000633	PacBio	exon	11322	11455	.	-	.	gene_id "PBfusion.66"; transcript_id "PBfusion.66.1";
GWHAAEP00000633	PacBio	exon	12622	12730	.	-	.	gene_id "PBfusion.66"; transcript_id "PBfusion.66.1";
GWHAAEP00000633	PacBio	exon	13533	13654	.	-	.	gene_id "PBfusion.66"; transcript_id "PBfusion.66.1";
GWHAAEP00000633	PacBio	exon	14165	14271	.	-	.	gene_id "PBfusion.66"; transcript_id "PBfusion.66.1";
GWHAAEP00000633	PacBio	exon	14647	14751	.	-	.	gene_id "PBfusion.66"; transcript_id "PBfusion.66.1";
GWHAAEP00000633	PacBio	exon	14850	15088	.	-	.	gene_id "PBfusion.66"; transcript_id "PBfusion.66.1";
GWHAAEP00000633	PacBio	exon	15379	15434	.	-	.	gene_id "PBfusion.66"; transcript_id "PBfusion.66.1";
GWHAAEP00000633	PacBio	exon	15804	16053	.	-	.	gene_id "PBfusion.66"; transcript_id "PBfusion.66.1";
GWHAAEP00000633	PacBio	exon	16274	17510	.	-	.	gene_id "PBfusion.66"; transcript_id "PBfusion.66.1";
GWHAAEP00000862	PacBio	transcript	60577	70916	.	-	.	gene_id "PBfusion.66"; transcript_id "PBfusion.66.2";
GWHAAEP00000862	PacBio	exon	60577	61391	.	-	.	gene_id "PBfusion.66"; transcript_id "PBfusion.66.2";
GWHAAEP00000862	PacBio	exon	61515	61600	.	-	.	gene_id "PBfusion.66"; transcript_id "PBfusion.66.2";
GWHAAEP00000862	PacBio	exon	62052	62165	.	-	.	gene_id "PBfusion.66"; transcript_id "PBfusion.66.2";
GWHAAEP00000862	PacBio	exon	63585	63954	.	-	.	gene_id "PBfusion.66"; transcript_id "PBfusion.66.2";
GWHAAEP00000862	PacBio	exon	64728	64861	.	-	.	gene_id "PBfusion.66"; transcript_id "PBfusion.66.2";
GWHAAEP00000862	PacBio	exon	66028	66136	.	-	.	gene_id "PBfusion.66"; transcript_id "PBfusion.66.2";
GWHAAEP00000862	PacBio	exon	66939	67060	.	-	.	gene_id "PBfusion.66"; transcript_id "PBfusion.66.2";
GWHAAEP00000862	PacBio	exon	67571	67677	.	-	.	gene_id "PBfusion.66"; transcript_id "PBfusion.66.2";
GWHAAEP00000862	PacBio	exon	68053	68157	.	-	.	gene_id "PBfusion.66"; transcript_id "PBfusion.66.2";
GWHAAEP00000862	PacBio	exon	68256	68494	.	-	.	gene_id "PBfusion.66"; transcript_id "PBfusion.66.2";
GWHAAEP00000862	PacBio	exon	68785	68840	.	-	.	gene_id "PBfusion.66"; transcript_id "PBfusion.66.2";
GWHAAEP00000862	PacBio	exon	69210	69459	.	-	.	gene_id "PBfusion.66"; transcript_id "PBfusion.66.2";
GWHAAEP00000862	PacBio	exon	69680	70916	.	-	.	gene_id "PBfusion.66"; transcript_id "PBfusion.66.2";
GWHAAEP00001906	PacBio	transcript	13979	16357	.	-	.	gene_id "PBfusion.61"; transcript_id "PBfusion.61.1";
GWHAAEP00001906	PacBio	exon	13979	15606	.	-	.	gene_id "PBfusion.61"; transcript_id "PBfusion.61.1";
GWHAAEP00001906	PacBio	exon	15642	16357	.	-	.	gene_id "PBfusion.61"; transcript_id "PBfusion.61.1";
GWHAAEP00003011	PacBio	transcript	50721	53099	.	+	.	gene_id "PBfusion.61"; transcript_id "PBfusion.61.2";
GWHAAEP00003011	PacBio	exon	50721	51436	.	+	.	gene_id "PBfusion.61"; transcript_id "PBfusion.61.2";
GWHAAEP00003011	PacBio	exon	51472	53099	.	+	.	gene_id "PBfusion.61"; transcript_id "PBfusion.61.2";
GWHAAEP00000633	PacBio	transcript	81674	85622	.	+	.	gene_id "PBfusion.60"; transcript_id "PBfusion.60.1";
GWHAAEP00000633	PacBio	exon	81674	81725	.	+	.	gene_id "PBfusion.60"; transcript_id "PBfusion.60.1";
GWHAAEP00000633	PacBio	exon	82244	82471	.	+	.	gene_id "PBfusion.60"; transcript_id "PBfusion.60.1";
GWHAAEP00000633	PacBio	exon	84321	84438	.	+	.	gene_id "PBfusion.60"; transcript_id "PBfusion.60.1";
GWHAAEP00000633	PacBio	exon	85121	85622	.	+	.	gene_id "PBfusion.60"; transcript_id "PBfusion.60.1";
GWHAAEP00000862	PacBio	transcript	135080	139028	.	+	.	gene_id "PBfusion.60"; transcript_id "PBfusion.60.2";
GWHAAEP00000862	PacBio	exon	135080	135131	.	+	.	gene_id "PBfusion.60"; transcript_id "PBfusion.60.2";
GWHAAEP00000862	PacBio	exon	135650	135877	.	+	.	gene_id "PBfusion.60"; transcript_id "PBfusion.60.2";
GWHAAEP00000862	PacBio	exon	137727	137844	.	+	.	gene_id "PBfusion.60"; transcript_id "PBfusion.60.2";
GWHAAEP00000862	PacBio	exon	138527	139028	.	+	.	gene_id "PBfusion.60"; transcript_id "PBfusion.60.2";
GWHAAEP00001928	PacBio	transcript	316	5381	.	+	.	gene_id "PBfusion.63"; transcript_id "PBfusion.63.1";
GWHAAEP00001928	PacBio	exon	316	2562	.	+	.	gene_id "PBfusion.63"; transcript_id "PBfusion.63.1";
GWHAAEP00001928	PacBio	exon	2662	3106	.	+	.	gene_id "PBfusion.63"; transcript_id "PBfusion.63.1";
[truncated: 355 more rows]
